# Supplementary material for: Choosing a model to predict hospital admission: an observational study of new variants of predictive models for case finding
Source: PubMed Central journal article supplement — BMJ Open. 2013 Aug 23;3(8):e003352. doi: 10.1136/bmjopen-2013-003352 (PMC3753475; doi:10.1136/bmjopen-2013-003352), 2013-08-23
Supplement: bmjopen-2013-003352.draft_revisions.pdf [file bmjopen-2013-003352.draft_revisions.pdf]

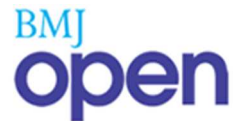

**Choosing a model to predict hospital admission. An observational study of new variants of predictive models for case finding.**

|                                 |                                                                                                                                                                                                                     |
|---------------------------------|---------------------------------------------------------------------------------------------------------------------------------------------------------------------------------------------------------------------|
| Journal:                        | <i>BMJ Open</i>                                                                                                                                                                                                     |
| Manuscript ID:                  | bmjopen-2013-003352                                                                                                                                                                                                 |
| Article Type:                   | Research                                                                                                                                                                                                            |
| Date Submitted by the Author:   | 05-Jun-2013                                                                                                                                                                                                         |
| Complete List of Authors:       | Billings, John; New York University, Georghiou, Theo; Nuffield Trust, Research Bardsley, Martin; Nuffield Trust, Research Blunt, Ian; Nuffield Trust, Research                                                      |
| <b>Primary Subject Heading</b>: | Health services research                                                                                                                                                                                            |
| Secondary Subject Heading:      | Health informatics, Health policy                                                                                                                                                                                   |
| Keywords:                       | Quality in health care < HEALTH SERVICES ADMINISTRATION & MANAGEMENT, Health economics < HEALTH SERVICES ADMINISTRATION & MANAGEMENT, Organisation of health services < HEALTH SERVICES ADMINISTRATION & MANAGEMENT |
|                                 |                                                                                                                                                                                                                     |

SCHOLARONE™  
Manuscripts

1  
2  
3 **Choosing a model to predict hospital admission. An observational study of new variants of predictive**  
4 **models for case finding.**  
5  
6  
7  
8  
9  
10  
11  
12

13 John Billings, Associate Professor (1)  
14 Theo Georghiou, Senior Research Analyst (2)  
15 Martin Bardsley, Director of Research (2)  
16 Ian Blunt, Senior Research Analyst (2)  
17  
18  
19  
20

21 <sup>1</sup> Robert F. Wagner Graduate School of Public Service, New York University, 295 Lafayette Street, Room  
22 3010, New York, NY 10012-9604, USA  
23

24 <sup>2</sup> Nuffield Trust, 59 New Cavendish Street, London W1G 7LP, UK  
25  
26

27 **Corresponding Author** [theo.georghiou@nuffieldtrust.org.uk](mailto:theo.georghiou@nuffieldtrust.org.uk)  
28  
29  
30  
31  
32  
33  
34

35 **Key words:**  
36

37 Predictive Risk, Urgent care, Hospital admission  
38  
39  
40  
41  
42

43 Word count: 3,911  
44  
45  
46  
47  
48  
49  
50  
51  
52  
53  
54  
55  
56  
57  
58  
59  
60

**ABSTRACT**

**Objectives:** To test the performance of new variants of models to identify people at risk of an emergency hospital admission. We compared (1) the impact of using alternative data sources (hospital inpatient, A&E, outpatient, and GP electronic medical records) (2) the effects of local calibration on the performance of the models and (3) the choice of population denominators.

**Design:** Multivariate logistic regressions using person level data adding each data set sequentially to test value of additional variables and denominators.

**Setting:** Five Primary Care Trusts within England.

**Participants:** 1,836,099 people aged 18-95 registered with GPs on 31 July 2009.

**Main outcome measures:** Models to predict hospital admission and readmission were compared in terms of positive predictive value and sensitivity for various risk strata and with receiver operating curve C statistic.

**Results:** The addition of each data set showed moderate improvement in number of patients identified with little or no loss of positive predictive value. However, even with inclusion of GP electronic medical record information, the algorithms identified only a small number of patients with no emergency hospital admissions in the prior two years. The model pooled across all sites performed almost as well as models calibrated to local data from just one site. Using population denominators from GP registers led to better case finding.

**Conclusions:** These models provide a basis for wider application in the NHS. Each of the models examined produce reasonably robust performance and offers some predictive value. The addition of more complex data add some value, but we were unable to conclude that pooled models performed less well than those in individual sites. Choices about model should be linked to the intervention design. Characteristics of patients identified by the algorithms provide useful information in the design/costing of intervention strategies to improve care coordination/outcomes for these patients.

**Article focus**

- The use of statistical models to predict risk of hospital admissions are increasingly used to prioritise patients for preventive care. Models exist in several different forms and use a variety of input data sets.
- This paper compared the performance of a variety of models built using different datasets.

**Key messages**

- The addition of more detailed data sets led to moderate improvement in number of patients identified with little or no loss of positive predictive value.
- The use of GP registry data for the denominator proved to be of significant importance. By including all patients in an area, not just those with prior hospital use, improved rates of case finding were observed.
- Models calibrated to local data sets did not show a consistent improvement over models built on pooled data.

**Strengths and limitations of this study**

- The analysis is based on populations from only five areas in England, however this is the largest UK population (1.8M people) used in the development of a publicly available risk tool.
- The success of a predictive model depends on many factors beyond the statistical performance of the model.

## INTRODUCTION

There remains continuing interest in identifying patients at risk of future hospital admissions. Policies providing penalties[1] or non-payment[2] for hospital readmissions that put providers at risk for a share of total health expenditures have been developed for in the U.S. and in England. These create even stronger incentives to identify high risk patients to target care coordination and management strategies that may potentially reduce future inpatient expenditures.

Most predictive modelling approaches have used administrative data from claims in the U.S. or hospital data from Hospital Episode Statistics (HES) or Secondary Uses Services (SUS) in England. These data provide the information on prior utilisation and diagnostic history to develop predictive models for patients at risk of future hospitalization.[3] Payor claims data in the U.S. provide rich information on care provided in hospitals, home care services and nursing home use, as well as detailed pharmacy prescription history.[4] In England, the most commonly used models (such as in the now outdated Patient at Risk of Readmission PARR algorithm)[5,6] are based on hospital admissions data (including day case use, and regular attendances) with some use of accident and emergency (A&E) and outpatient attendance data as well.[7]

While some predictive modeling efforts in the U.K. have included information from GP electronic medical records (EMRs),[8,9] using such data presents a number of challenges. These include obtaining permissions for access to EMRs for large populations, linking the records to hospital data, and use of Read codes[10] to develop GP variables. Data from EMRs include additional elements not available in the hospital data sets such as test results (e.g. blood pressure, HbA1c levels), diagnostic history for patients without recent inpatient admissions, prescription history, GP contact patterns (GP visits and telephone contacts), and other personal health markers (e.g. body mass index, smoking status). These additional data elements have the potential to add power to predictive modeling efforts, especially for patients with no or lower levels of recent inpatient use.

Despite the challenges, a number of initiatives around the UK are demonstrating population wide access to EMR data. A common application is in the use of models that assist local clinical commissioning groups (CCGs) in identifying high risk patients.

1  
2  
3  
4  
5  
6  
7  
8  
9  
10  
11  
12  
13  
14  
15  
16  
17  
18  
19  
20  
21  
22  
23  
24  
25  
26  
27  
28  
29  
30  
31  
32  
33  
34  
35  
36  
37  
38  
39  
40  
41  
42  
43  
44  
45  
46  
47  
48  
49  
50  
51  
52  
53  
54  
55  
56  
57  
58  
59  
60

Though the choice of data sets for a predictive model makes a big difference to the investment required to run these models – at least initially – no studies have looked at the marginal value of different data sets. In this analysis we examine the added value of including data on A&E and outpatient visits (which are readily available) to predictive modeling efforts using hospital inpatient data alone. We also assess the marginal effect of adding GP EMR information to help identify patients at risk of future hospital admissions.

In addition to the depth of data used there is also a question about how generalisable models are across different sites. In many settings models are recalibrated on local data sets. Yet there is little systematic analysis of the value that this step adds and whether models built on data from one site outperform those built on a larger sample of pooled data. We therefore explore whether there is a need for development of individual site predictive models, or whether models developed from multiple sites can be applied effectively at a new individual site.

## METHODS

We conducted analyses separately for five Primary Care Trust areas in England (Newham, Cornwall, Kent, Croydon, Redbridge; total adult population ranging from 209,661 to 693,089). Results are reported for the individual sites and as combined/pooled results (total population 1,836,099). Hospital data was extracted from the Secondary Users Services (SUS)[11] system which contained records of all hospital events (inpatient admissions, outpatient appointments and A&E visits) for the PCTs' registered populations between 1 August 2007 and 30 September 2010. The PCTs also extracted data from GP systems in two forms. Firstly as a register of the local adult population from 1 August 2007 and 31 July 2009, and secondly in the form of datasets recording details of GP consultations over the same time period.

Personally identifiable information was stripped out before any data were passed to the research team. Individuals' NHS numbers (the personal identifiers) were pseudonymised to allow for linkage between the hospital and the general practice data.

A series of variables were created from each data set that were believed to be potentially predictive of an unplanned (emergency) hospital admission in the last 12 months of the study period. These variables captured resource use, utilization patterns, diagnostic history, test results, and prescription history in the two years prior to the predictive period. They were created for all individuals aged 18+ registered with a GP in one of the five areas on 31 July 2009. To account for expected time required to obtain and process the hospital and GP EMR data, we included a two-month lag in our analyses, with data from 1 August 2007 to 31 July 2009 used to predict emergency admissions during the period 1 October 2009 to 30 September 2010.

Patient age and gender were obtained from the GP register. Patient area of residence was not available, and so GP practice attributed index of multiple deprivation (2007) was used as an area deprivation measure. The number of months the patient was registered with the PCT in the pre-period was calculated and included in the regression. Hospital inpatient data were used to capture utilization in the 0-90, 91-181, 180-365, and 366-730 days prior to the lag period. The number of emergency and elective admissions for these periods were included and dichotomous variables for any day case or regular attendance use were created.

1  
2  
3 A broad range of diagnostic variables were developed using primary and secondary diagnosis fields and  
4 a Charlson Comorbidity Index[12] was calculated for each patient and included in the model.  
5  
6

7  
8 A&E data were used to determine A&E visit rates for various intervals in the pre-period, both total visits  
9 and unplanned follow-up visits. A&E diagnostic information was not reliably reported across the five  
10 sites and was not included, although X-ray use was included. Outpatient data provided variables on  
11 outpatient visit rates for various intervals, as well as missed appointment rates and the number of  
12 different specialty types consulted. Diagnostic information in outpatient data was missing in more than  
13 95% of cases and was not included.  
14  
15  
16  
17

18  
19 GP EMR data were used to create proxy visit rates (these may include both actual GP visits, in addition  
20 to other events documented in a person's records) for various intervals and to capture any increase in  
21 visit rates at the end of the pre-period that may reflect increased morbidity in a patient. EMR Read  
22 codes (CTV3 version) were used to obtain test results (blood pressure, blood serum levels, HbA1c levels,  
23 etc.), body mass index, smoking history, prescription history (number and type), and a range of  
24 diagnostic variables during the pre-period.  
25  
26  
27  
28

29  
30 Variables from each data set (inpatient (including day case and regular attenders), A&E, outpatient, and  
31 GP EMRs) were added and modeled sequentially using standard logistic regression in SPSS v20.  
32

33  
34 Emergency admission in the next 12 months was used as the dependent variable, producing a risk score  
35 ranging from 0-100. Separate models were developed for each PCT area, and analysis was limited to  
36 patients aged 18-95 who were on the GP register in the area. Over-fitting was tested using a split  
37 sample approach, with only minor differences observed in positive predictive values (PPV), sensitivity,  
38 and specificity.  
39  
40  
41  
42

43  
44 Findings provided here include both individual site results and results combined across the five sites.

45 We also created five additional predictive models (referred to below as the 'four-site regression  
46 models'), each one combining data from four sites and applying coefficients to the fifth remaining site.  
47 With this we could compare results with individual site predictive models to help assess the value of  
48 local model development.  
49  
50  
51  
52

53  
54 The full list of more than 300 potential variables was ultimately reduced to 88 by exclusion of variables  
55 with low volumes and low significance levels across the sites. The 88 variables ultimately included in the  
56 model (and regression coefficients), may be found in Appendix B, and a full listing of the variables  
57  
58  
59  
60



1  
2  
3 considered for inclusion and detailed specification of each variable are available at  
4 <http://www.nuffieldtrust.org.uk/>.  
5  
6

7  
8 Cost variables were examined, with secondary care activity costed according to the method used in  
9 development of the person based formula for allocating commissioning funds to general practices in  
10 England.[13] Ultimately, these were not included in the predictive models because of concerns about  
11 difficulties in constructing these variables by possible future users, however costs are included in  
12 descriptive findings to help in design of intervention strategies.  
13  
14  
15

16  
17 Predictive modeling performance is typically documented reporting PPV and sensitivity at the risk score  
18 threshold of 50. However, because interventions may be targeted at patients with higher or lower risk  
19 scores and interventions strategies may be calibrated differently depending on risk level and  
20 characteristics of patients at various risk score levels, we report PPV sensitivity at 20 risk score cutoff  
21 points (vigintiles) and provide detailed patient characteristics at risk score thresholds of 50 and 30 to  
22 facilitate intervention design.  
23  
24  
25  
26  
27

## 28 29 **RESULTS**

### 30 31 **Pooled Individual Site Results**

32  
33 There were 1,836,099 people aged 18 and over who were registered with a GP practice on 31 July 2009.  
34 Table 1 shows the combined results of individual site regressions including the number of patients  
35 correctly identified, PPV, and sensitivity for four models:  
36  
37

- 38 (i) IP based on hospital inpatient data only (including day cases and regular attendances)
- 39 (ii) IPAE using inpatient and A&E data
- 40 (iii) IPAEOP using inpatient A&E and outpatient data
- 41 (iv) IPAEOPGP using inpatient, A&E, outpatient data and GP EMR.  
42  
43  
44

45 At the traditional risk score threshold level of 50 all four models perform respectably in terms of PPV  
46 (ranging from .523 to .538), but sensitivity remains quite low across all models (.049 to .060). Lowering  
47 the threshold to 30 increases sensitivity somewhat with a concomitant reduction in PPV (ranging from  
48 .417 to .422). The ROC area under the curve (C statistic) improved with the addition of each data set,  
49 increasing from .731 with the inpatient-only model to .780 with the full model.  
50  
51  
52  
53  
54  
55  
56  
57  
58  
59  
60

1  
2  
3  
4  
5  
6  
7  
8  
9  
10  
11  
12  
13  
14  
15  
16  
17  
18  
19  
20  
21  
22  
23  
24  
25  
26  
27  
28  
29  
30  
31  
32  
33  
34  
35  
36  
37  
38  
39  
40  
41  
42  
43  
44  
45  
46  
47  
48  
49

**Table 1** Model performance, four models: IP, IPAE, IPAEOP, IPAEOPGP. Five site individual runs combined.

| Risk Score Threshold   | IP Data       |       |             | IP+AE Data    |       |             | IP+AE+OP Data |       |             | IP+AE+OP+GP Data |       |             |
|------------------------|---------------|-------|-------------|---------------|-------|-------------|---------------|-------|-------------|------------------|-------|-------------|
|                        | True Positive | PPV   | Sensitivity | True Positive | PPV   | Sensitivity | True Positive | PPV   | Sensitivity | True Positive    | PPV   | Sensitivity |
| 1                      | 94,692        | 0.052 | 1.000       | 94,692        | 0.052 | 1.000       | 94,692        | 0.052 | 1.000       | 94,692           | 0.052 | 1.000       |
| 5                      | 54,450        | 0.126 | 0.575       | 56,117        | 0.128 | 0.593       | 56,438        | 0.131 | 0.596       | 61,498           | 0.133 | 0.649       |
| 10                     | 33,053        | 0.219 | 0.349       | 34,102        | 0.221 | 0.360       | 35,033        | 0.223 | 0.370       | 39,986           | 0.220 | 0.422       |
| 15                     | 22,898        | 0.285 | 0.242       | 23,166        | 0.293 | 0.245       | 24,261        | 0.290 | 0.256       | 28,697           | 0.283 | 0.303       |
| 20                     | 16,181        | 0.346 | 0.171       | 16,915        | 0.347 | 0.179       | 17,719        | 0.344 | 0.187       | 21,601           | 0.333 | 0.228       |
| 25                     | 12,670        | 0.385 | 0.134       | 13,182        | 0.386 | 0.139       | 13,754        | 0.383 | 0.145       | 16,672           | 0.378 | 0.176       |
| 30                     | 10,061        | 0.421 | 0.106       | 10,555        | 0.422 | 0.111       | 11,010        | 0.419 | 0.116       | 13,196           | 0.417 | 0.139       |
| 35                     | 8,130         | 0.449 | 0.086       | 8,600         | 0.450 | 0.091       | 8,986         | 0.448 | 0.095       | 10,516           | 0.450 | 0.111       |
| 40                     | 6,700         | 0.477 | 0.071       | 7,139         | 0.478 | 0.075       | 7,421         | 0.476 | 0.078       | 8,494            | 0.479 | 0.090       |
| 45                     | 5,535         | 0.501 | 0.058       | 5,976         | 0.504 | 0.063       | 6,167         | 0.499 | 0.065       | 6,921            | 0.510 | 0.073       |
| 50                     | 4,627         | 0.529 | 0.049       | 5,027         | 0.531 | 0.053       | 5,172         | 0.523 | 0.055       | 5,669            | 0.538 | 0.060       |
| 55                     | 3,862         | 0.551 | 0.041       | 4,222         | 0.551 | 0.045       | 4,359         | 0.543 | 0.046       | 4,581            | 0.562 | 0.048       |
| 60                     | 3,239         | 0.574 | 0.034       | 3,555         | 0.569 | 0.038       | 3,658         | 0.567 | 0.039       | 3,735            | 0.587 | 0.039       |
| 65                     | 2,711         | 0.593 | 0.029       | 3,012         | 0.590 | 0.032       | 3,041         | 0.587 | 0.032       | 3,034            | 0.618 | 0.032       |
| 70                     | 2,245         | 0.617 | 0.024       | 2,481         | 0.612 | 0.026       | 2,519         | 0.610 | 0.027       | 2,453            | 0.645 | 0.026       |
| 75                     | 1,816         | 0.634 | 0.019       | 2,049         | 0.639 | 0.022       | 2,064         | 0.631 | 0.022       | 1,921            | 0.666 | 0.020       |
| 80                     | 1,418         | 0.666 | 0.015       | 1,662         | 0.656 | 0.018       | 1,646         | 0.654 | 0.017       | 1,478            | 0.696 | 0.016       |
| 85                     | 1,064         | 0.679 | 0.011       | 1,293         | 0.674 | 0.014       | 1,276         | 0.679 | 0.013       | 1,114            | 0.711 | 0.012       |
| 90                     | 769           | 0.710 | 0.008       | 932           | 0.688 | 0.010       | 935           | 0.702 | 0.010       | 754              | 0.738 | 0.008       |
| 95                     | 478           | 0.748 | 0.005       | 592           | 0.725 | 0.006       | 586           | 0.728 | 0.006       | 437              | 0.771 | 0.005       |
| Top 1%                 | 8,214         | 0.447 | 0.087       | 8,353         | 0.455 | 0.088       | 8,410         | 0.458 | 0.089       | 8,722            | 0.475 | 0.092       |
| Top 5%                 | 24,873        | 0.271 | 0.263       | 25,355        | 0.276 | 0.268       | 25,712        | 0.280 | 0.272       | 26,991           | 0.294 | 0.285       |
| <b>ROC C Statistic</b> |               | 0.731 |             | 0.745         |       | 0.752       |               | 0.780 |             |                  |       |             |

1  
2  
3 Of particular note is the finding that the addition of each data set added power, that is, correctly  
4 identified more patients with an admission in the next 12 months, with only a minor reduction in PPV.  
5 At a risk threshold of 50, the addition of A&E data resulted in increase of 400 (8.6%) correctly flagged  
6 patients, with no loss in PPV. The inclusion of outpatient data added a more modest 2.9%, but with a  
7 slight loss in PPV (.531 to .523). The addition of GP EMR data added an additional 9.6% of patients,  
8 while actually increasing the accuracy of the model (PPV increasing from .523 to .538). The added  
9 power of the A&E data set is less substantial at a risk score threshold of 30 (4.9%), but outpatient and  
10 GP EMR data sets had larger increases in correctly identified patients (4.3% and 19.9%).  
11  
12  
13  
14  
15  
16  
17

18 There were also important differences between the models in terms of the characteristics of patients  
19 identified as high risk. For example, at a risk score cutoff of 50, patients identified using inpatient data  
20 alone had high prior emergency inpatient utilization rates with 2.62 admissions in the prior year  
21 compared to 2.43 when A&E data was added; 2.34 with addition of outpatient, and 2.20 with the  
22 addition of GP EMR data - see Table 2.  
23  
24  
25  
26  
27

28 The inclusion of the additional data sets also led to a reduction in observed morbidity level of patients at  
29 the 50 threshold, with lower numbers of long term conditions, fewer patients with multiple long term  
30 conditions, lower Charlson Comorbidity Index scores, less history of alcohol abuse and mental illness,  
31 and lower emergency inpatient costs in the years prior to the predictive period. Similar, but less  
32 substantial differences were observed at the risk score threshold of 30. The addition of the A&E data set  
33 resulted in higher rates of A&E visits in the pre-period among patients identified at both risk score cutoff  
34 levels, and the addition of outpatient data resulted in higher outpatient visit and missed visit rates  
35 among identified patients  
36  
37  
38  
39  
40  
41  
42

43 These findings suggest inclusion of the additional data sets added some predictive power and generally  
44 tended to find patients who were less severely ill. Thus they potentially offer an opportunity for  
45 intervention at earlier stages in the progression of a patient's condition. However, the number of  
46 patients identified with no prior emergency inpatient utilization in the prior two years was relatively  
47 small across all models. At a risk score threshold of 50, only 0.3% of patients correctly identified by the  
48 inpatient-only model had no prior emergency admissions in the previous two years, and increasing only  
49 modestly 3.2% in the full model (Table 3). At a risk threshold of 30, the rates were higher, but only  
50 reaching 12.4% for the full model.  
51  
52  
53  
54  
55  
56  
57  
58  
59  
60

**Table 2** Patient characteristics by risk score threshold four models: IP, IPAE, IPAEOP, IPAEOPGP. Five site individual runs combined.

|                               | Risk Score 50+ |              |                |                  | Risk Score 30+ |              |                |                  |
|-------------------------------|----------------|--------------|----------------|------------------|----------------|--------------|----------------|------------------|
|                               | IP<br>Data     | IPAE<br>Data | IPAEOP<br>Data | IPAEOPGP<br>Data | IP<br>Data     | IPAE<br>Data | IPAEOP<br>Data | IPAEOPGP<br>Data |
| Number of patients            | 8,743          | 9,473        | 9,892          | 10,545           | 23,912         | 25,021       | 26,304         | 31,653           |
| Patients with adm next 12 mos | 4,627          | 5,027        | 5,172          | 5,669            | 10,062         | 10,554       | 11,011         | 13,196           |
| Mean Age                      | 73.9           | 72.3         | 71.2           | 72.2             | 75.3           | 74.0         | 73.4           | 73.9             |
| Age 18-39                     | 6.2%           | 8.4%         | 8.7%           | 7.8%             | 5.1%           | 6.8%         | 7.0%           | 6.4%             |
| Age 40-54                     | 8.7%           | 9.6%         | 10.9%          | 10.6%            | 7.0%           | 7.8%         | 8.6%           | 8.5%             |
| Age 55-64                     | 6.9%           | 7.4%         | 7.8%           | 8.1%             | 6.4%           | 6.4%         | 7.0%           | 7.3%             |
| Age 65-74                     | 14.4%          | 13.9%        | 15.0%          | 13.5%            | 13.9%          | 13.8%        | 14.4%          | 13.7%            |
| Age 75-84                     | 30.5%          | 28.9%        | 28.2%          | 27.4%            | 32.1%          | 31.1%        | 30.3%          | 29.6%            |
| Age 85+                       | 33.3%          | 31.8%        | 29.3%          | 32.6%            | 35.5%          | 34.1%        | 32.7%          | 34.4%            |
| Female                        | 55.2%          | 55.2%        | 54.9%          | 54.7%            | 56.9%          | 57.1%        | 56.6%          | 56.5%            |
| Practice IMD                  | 24.6           | 24.9         | 24.8           | 24.3             | 24.2           | 24.3         | 24.3           | 23.8             |
| Ischaemic Heart Disease       | 36.2%          | 34.2%        | 33.2%          | 32.1%            | 29.8%          | 28.4%        | 27.8%          | 25.2%            |
| Angina                        | 21.7%          | 20.5%        | 19.5%          | 19.3%            | 17.3%          | 16.4%        | 15.7%          | 14.5%            |
| Hypertension                  | 64.5%          | 61.2%        | 59.9%          | 59.0%            | 59.4%          | 56.7%        | 55.1%          | 50.9%            |
| CHF                           | 19.2%          | 17.8%        | 16.9%          | 15.9%            | 14.0%          | 13.2%        | 12.5%          | 10.7%            |
| CVD                           | 21.7%          | 20.1%        | 19.3%          | 18.1%            | 16.9%          | 15.8%        | 15.2%          | 13.3%            |
| COPD                          | 23.4%          | 21.4%        | 20.6%          | 19.1%            | 17.2%          | 16.3%        | 15.7%          | 13.4%            |
| Asthma                        | 21.3%          | 20.9%        | 20.1%          | 18.1%            | 17.4%          | 16.6%        | 16.1%          | 13.8%            |
| Diabetes                      | 34.1%          | 32.4%        | 31.6%          | 28.8%            | 30.1%          | 28.8%        | 27.6%          | 23.6%            |
| Renal Failure                 | 16.5%          | 14.6%        | 14.2%          | 13.3%            | 11.2%          | 10.4%        | 10.0%          | 8.5%             |
| Any long term conditions      | 89.8%          | 87.0%        | 85.8%          | 85.0%            | 86.6%          | 83.6%        | 81.4%          | 75.2%            |
| Any cancer                    | 15.4%          | 13.8%        | 13.4%          | 12.4%            | 13.3%          | 12.7%        | 12.2%          | 10.5%            |
| Alcohol misuse                | 10.0%          | 10.0%        | 9.6%           | 9.1%             | 7.0%           | 6.7%         | 6.4%           | 5.8%             |
| Mental illness                | 32.0%          | 30.6%        | 28.9%          | 27.2%            | 23.5%          | 22.3%        | 21.3%          | 18.6%            |
| Number long term conditions   | 2.67           | 2.51         | 2.43           | 2.31             | 2.20           | 2.10         | 2.02           | 1.79             |
| Charlson Index                | 3.96           | 3.69         | 3.55           | 3.28             | 3.09           | 2.95         | 2.82           | 2.43             |
| Emerg adms 1yr prior          | 2.62           | 2.43         | 2.34           | 2.20             | 1.64           | 1.57         | 1.50           | 1.29             |
| Emerg adms 2 yr prior         | 1.78           | 1.67         | 1.61           | 1.50             | 1.15           | 1.10         | 1.05           | 0.91             |
| No emerg adm prior 2 yrs      | 0.6%           | 1.9%         | 3.3%           | 4.3%             | 4.2%           | 6.5%         | 9.2%           | 16.2%            |
| Elect adms 1yr prior          | 0.32           | 0.29         | 0.31           | 0.28             | 0.27           | 0.26         | 0.27           | 0.24             |
| Elect adms 2 yr prior         | 0.24           | 0.23         | 0.26           | 0.24             | 0.20           | 0.20         | 0.22           | 0.19             |
| Any day case 1yr prior        | 31.9%          | 30.8%        | 31.6%          | 28.7%            | 31.5%          | 30.7%        | 30.4%          | 26.9%            |
| Any day case 2yr prior        | 28.9%          | 27.6%        | 28.0%          | 25.7%            | 27.8%          | 26.9%        | 26.7%          | 23.7%            |
| Emerg adm cost 1yr prior      | £4,500         | £4,073       | £3,920         | £3,688           | £2,893         | £2,709       | £2,604         | £2,231           |
| Emerg adm cost 2yr prior      | £2,932         | £2,675       | £2,583         | £2,422           | £1,962         | £1,822       | £1,757         | £1,521           |
| AE visits 1yr prior           | 2.90           | 3.59         | 3.45           | 3.17             | 1.83           | 2.26         | 2.17           | 1.86             |
| AE visits 2yr prior           | 1.90           | 2.40         | 2.31           | 2.10             | 1.23           | 1.52         | 1.46           | 1.25             |
| OP visits 1yr prior           | 7.27           | 6.94         | 9.65           | 8.23             | 5.65           | 5.63         | 7.39           | 6.16             |
| OP visits 2yr prior           | 4.30           | 4.10         | 5.92           | 5.08             | 3.39           | 3.38         | 4.54           | 3.81             |
| OP visits missed 1yr prior    | 0.47           | 0.48         | 0.74           | 0.65             | 0.35           | 0.36         | 0.53           | 0.44             |
| OP visits missed 2yr prior    | 0.49           | 0.48         | 0.71           | 0.61             | 0.33           | 0.34         | 0.48           | 0.40             |
| GP visits 1yr prior           | 42.9           | 42.7         | 43.3           | 52.5             | 38.5           | 38.4         | 38.8           | 45.4             |
| GP visits 2yr prior           | 35.5           | 35.2         | 35.7           | 42.5             | 32.4           | 32.1         | 32.5           | 37.7             |
| Any high risk BNFs            | 73.9%          | 71.6%        | 72.2%          | 84.0%            | 69.3%          | 67.5%        | 68.1%          | 79.8%            |
| Num high risk BNFs            | 1.94           | 1.85         | 1.88           | 2.20             | 1.64           | 1.59         | 1.61           | 1.84             |
| High blood pressure           | 9.0%           | 9.0%         | 9.0%           | 9.0%             | 10.0%          | 10.0%        | 10.0%          | 9.0%             |
| Smoker                        | 18.0%          | 19.0%        | 19.0%          | 23.0%            | 16.0%          | 16.0%        | 16.0%          | 20.0%            |
| BMI 30+                       | 16.0%          | 17.0%        | 17.0%          | 17.0%            | 15.0%          | 16.0%        | 16.0%          | 18.0%            |
| HbA1c > 10                    | 5.0%           | 5.0%         | 5.0%           | 7.0%             | 5.0%           | 5.0%         | 4.0%           | 6.0%             |
| Any Em adm next 12 mos        | 52.9%          | 53.1%        | 52.3%          | 53.8%            | 42.1%          | 42.2%        | 41.9%          | 41.7%            |
| Num Em adm next 12 mos        | 1.34           | 1.33         | 1.29           | 1.31             | 0.89           | 0.89         | 0.87           | 0.84             |
| 0 Em adm next 12 mos          | 47.1%          | 46.9%        | 47.7%          | 46.2%            | 57.9%          | 57.8%        | 58.1%          | 58.3%            |
| 1 Em adm next 12 mos          | 23.0%          | 23.0%        | 23.2%          | 23.9%            | 21.7%          | 21.9%        | 21.7%          | 22.3%            |
| 2 Em adm next 12 mos          | 12.5%          | 12.5%        | 12.3%          | 13.2%            | 10.0%          | 10.0%        | 10.0%          | 9.9%             |
| 3 Em adm next 12 mos          | 7.3%           | 7.3%         | 7.0%           | 7.1%             | 4.8%           | 4.9%         | 4.8%           | 4.6%             |
| 4+ Em adm next 12 mos         | 10.2%          | 10.2%        | 9.8%           | 9.7%             | 5.5%           | 5.5%         | 5.3%           | 4.9%             |
| Emerg adm cost next 12 mos    | £2,358         | £2,266       | £2,199         | £2,270           | £1,608         | £1,575       | £1,546         | £1,507           |

|                       |      |      |      |      |      |      |      |      |
|-----------------------|------|------|------|------|------|------|------|------|
| AE visits next 12 mos | 1.88 | 2.11 | 2.04 | 2.04 | 1.24 | 1.37 | 1.36 | 1.29 |
|-----------------------|------|------|------|------|------|------|------|------|

**Table 3** Proportion of patients correctly identified, who had no emergency admissions in the prior two years. Four models: IP, IPAE, IPAEOP, IPAEOPGP. Five site individual runs combined.

| Prediction threshold | IP Data | IPAE Data | IPAEOP Data | IPAEOPGP Data |
|----------------------|---------|-----------|-------------|---------------|
| Risk Score 50+       | 0.3%    | 1.2%      | 2.3%        | 3.2%          |
| Risk Score 30+       | 2.7%    | 4.4%      | 6.3%        | 12.4%         |
| Top 1%               | 1.5%    | 2.9%      | 4.2%        | 6.5%          |
| Top 5%               | 25.9%   | 26.4%     | 26.7%       | 30.8%         |

### Individual Site and 'Four-Site Regression' Model Results

Overall the performance of the models was similar at the individual site level. Only modest differences were found in PPV levels and sensitivity across the sites. For runs using non-GP data only (IPAEOP), at the risk score threshold of 50, PPVs ranged from .512 to .552 and sensitivity ranged from .047 to .071. For the model including GP EMRs, PPVs ranged from .521 to .566 and sensitivity from .053 to .073. See Appendix A. There was some variation in the magnitude of regression coefficients between sites, but in general the coefficients were comparable for models based on the non-GP data model (IPAEOP). See Appendix B. For the model including variables from GP EMRs (IPAEOPGP), the level of variation in regression coefficients (size and direction) was somewhat greater for those variables derived from GP data. We observed substantial differences in frequency of reporting of Read codes across sites which no doubt contributed to this variation. The level of significance of individual variables also varied across sites (Appendix C), but most variables were consistently strongly significant across all sites, especially variables involving prior emergency inpatient admissions. Again, higher levels of variation in levels of significance were observed for the GP variables derived from Read codes.

We compared the results for these individual site models to a pooled model combining data from four of the sites and applied coefficients to the remaining individual site. We found generally only small differences in predictive accuracy (PPV) between these two approaches (Table 4), however the individual site models identified a greater number of true positives. For example, in Cornwall at a risk

score cutoff of 50, the individual site model using hospital data identified correctly 1,041 patients while the pooled model identified only 754. In Newham however, the four-site model was more powerful, correctly identifying 858 patients compared to 734 for the individual site approach. In both cases (and in general across all sites), the model identifying larger numbers of true positives had a somewhat lower PPV, suggesting improved case finding volume came at the expense of predictive accuracy.

**Table 4** Individual site and four-site regression models. Case finding and predictive accuracy.

|                  | IPOP AE                    |       |                      |       | IPOP AEGP                  |       |                      |       |
|------------------|----------------------------|-------|----------------------|-------|----------------------------|-------|----------------------|-------|
|                  | Individual Site Regression |       | Four Site Regression |       | Individual Site Regression |       | Four Site Regression |       |
|                  | True Positives             | PPV   | True Positives       | PPV   | True Positives             | PPV   | True Positives       | PPV   |
| <b>Newham</b>    |                            |       |                      |       |                            |       |                      |       |
| Risk Score 50+   | 734                        | 0.552 | 858                  | 0.517 | 768                        | 0.566 | 835                  | 0.523 |
| Risk Score 30+   | 1,409                      | 0.450 | 1,564                | 0.414 | 1,570                      | 0.439 | 1,798                | 0.409 |
| <b>Cornwall</b>  |                            |       |                      |       |                            |       |                      |       |
| Risk Score 50+   | 1,041                      | 0.520 | 754                  | 0.548 | 1,176                      | 0.545 | 952                  | 0.556 |
| Risk Score 30+   | 2,439                      | 0.406 | 1,970                | 0.426 | 3,032                      | 0.410 | 2,746                | 0.411 |
| <b>Kent</b>      |                            |       |                      |       |                            |       |                      |       |
| Risk Score 50+   | 1,565                      | 0.513 | 1,387                | 0.519 | 1,736                      | 0.521 | 1,873                | 0.493 |
| Risk Score 30+   | 3,372                      | 0.401 | 3,067                | 0.403 | 4,079                      | 0.397 | 4,432                | 0.369 |
| <b>Croydon</b>   |                            |       |                      |       |                            |       |                      |       |
| Risk Score 50+   | 1,089                      | 0.528 | 1,192                | 0.523 | 1,182                      | 0.550 | 1,230                | 0.537 |
| Risk Score 30+   | 2,134                      | 0.444 | 2,258                | 0.424 | 2,610                      | 0.442 | 2,502                | 0.437 |
| <b>Redbridge</b> |                            |       |                      |       |                            |       |                      |       |
| Risk Score 50+   | 743                        | 0.512 | 863                  | 0.495 | 807                        | 0.522 | 607                  | 0.519 |
| Risk Score 30+   | 1,656                      | 0.420 | 1,693                | 0.415 | 1,905                      | 0.423 | 1,390                | 0.436 |

### Testing alternative population denominators

Models built using inpatient data only (IP) were also built for just the subset of patients who had some inpatient care in the prior two years (to reflect typical predictive modeling efforts that may have been conducted without access to GP registry information), as well as for the group who had had an emergency admission in the prior year (to replicate analyses conducted by PARR users).

1  
2  
3  
4  
5  
6  
7  
8  
9  
10  
11  
12  
13  
14  
15  
16  
17  
18  
19  
20  
21  
22  
23  
24  
25  
26  
27  
28  
29  
30  
31  
32  
33  
34  
35  
36  
37  
38  
39  
40  
41  
42  
43  
44  
45  
46  
47  
48  
49  
50  
51  
52  
53  
54  
55  
56  
57  
58  
59  
60

Combining the results from the five sites at a risk score threshold of 50, models using GP list denominator correctly identified 4,627 patients compared with 3,572 patients in runs restricted to patients with prior inpatient care and 3,060 to runs limited to patients with an emergency admission in the prior year. This substantial increase in case finding was obtained with only moderate loss in PPV (.529 GP list, .559 prior inpatient and .589 emergency admissions in last year). Similar results were also found for all hospital data models (IPOP AE, though with any hospital use in prior two years, rather than just any inpatient use).

Using the full GP registry population did not result in finding substantial numbers of patients with no emergency admissions in the prior two years, but the increased numbers of patients identified included more patients with less prior use and lower levels of morbidity. For a profile of patients identified using these alternative denominators see <http://www.nuffieldtrust.org.uk/>.

## DISCUSSION

This analysis has looked at the performance of new variants of predictive models for case finding. These models are intended to update and improve upon the established combined predictive model-like [14] and PARR models [5] widely used in the NHS.

Each of the models examined produced reasonably robust performance. At a risk threshold of 50, patients identified by the models had PPVs ranging from .523 to .538. While the percent of all patients with future admissions identified was relatively low (sensitivity .049 to .060), lowering the risk threshold allows the identification of more patients with relatively small loss in PPV (e.g. at a risk threshold of 30, the full model identified 14% of future admissions with a PPV of .417). Users of predictive modeling algorithms have obvious trade-offs between maximizing the number of patients identified and predictive accuracy. Lower risk score thresholds will find more patients, but these patients are increasingly less likely to have future admissions.

The implications for intervention design are important. Patients at lower risk thresholds have less prior inpatient use and lower morbidity, so an intervention here might be calibrated to be less intensive. But because the models are less accurate at lower risk scores, the amount that can be spent on an intervention is also reduced if you wish to achieve financial break-even (ie where the cost of intervention is off-set by cost savings from reduction in future admissions). As documented in Table 2, at a risk score threshold of 50, the rate of future admission for patients identified by the full model

1  
2  
3 (IPAEOPGP data) was 1.31 admissions per year with an associated cost of £2,270. If there were a 10%  
4 reduction in future admissions, £227 could be spent on an intervention to improve care coordination  
5 and still achieve break-even. However, at a lower risk threshold of 30, the lower rates of future  
6 admissions and costs means that lower intervention expenditures are required to achieve break-even  
7 (£151 with a 10% reduction in future admissions). A detailed business case analysis with mean  
8 emergency inpatient costs in the next 12 months within each risk vigintile level is available via  
9 <http://www.nuffieldtrust.org.uk/>.

10  
11  
12  
13  
14  
15  
16  
17 These data also provide other information that may be useful in the development of intervention  
18 strategies. As shown in Table 2, patients identified by the models have extremely high rates of chronic  
19 disease (85-90% with long term conditions at risk threshold of 50), often with multiple long term  
20 conditions and high Charlson Comorbidity Index levels, indicating serious medical needs. However,  
21 these patients already have high use of outpatient care and very high GP visit rates. This suggests simple  
22 access to ambulatory care is not the issue, but prevention needs to look at care coordination and  
23 management of complex problems and at the ability of patients and their families to manage chronic  
24 illness. High risk patients identified by the models also have relatively high rates of mental illness (27-  
25 32% at risk threshold of 50) and moderate levels of alcohol abuse, factors that are likely to complicate  
26 any intervention strategy.

27  
28  
29  
30  
31  
32  
33  
34  
35 It is also important to note the limitations of these data in helping frame the design of any intervention  
36 strategy. Other studies have documented that high risk patients often have important characteristics  
37 related to care needs and patient capacity not captured by administrative data and EMRs. For example,  
38 interviews with high risk patients and their families have documented high levels of social isolation for  
39 many, as well as precarious housing status.[15] These non-medical factors are likely to have significant  
40 impact on health status and utilization patterns. Moreover, not much is known about how/whether  
41 care coordination and management has actually failed for these patients. Are these high risk patients  
42 just very sick patients whose hospitalizations are largely not preventable/avoidable, or has the care  
43 delivery system failed in some important dimensions that can be corrected with improved care  
44 coordination and management? These data cannot answer this very critical question, and it is clear that  
45 the field would benefit from further study that examined the circumstances of patients identified as  
46 high risk by predictive modeling algorithms to sort out more clearly the factors contributing to high rates  
47 of emergency admission.



1  
2  
3 This study does document the value of incorporating data sets beyond inpatient records. The addition  
4 of A&E and outpatient records resulted in identification of more high risk patients with little or no loss of  
5 predictive accuracy. These data sets are readily available and have standardized reporting formats that  
6 facilitate analysis. While the absence of useful diagnostic information in these data sets is a limiting  
7 factor, the improvement in case finding and usefulness in descriptive profiling of high risk patients to  
8 help in intervention design (e.g. high rates of A&E use rates, high rates of missed outpatient  
9 appointments) suggests their inclusion is clearly merited.

10  
11 Use of GP EMRs presents significant challenges. While the lack of access to these data is unlikely to  
12 remain a problem, the variation in completeness and quality of data is problematic. The use of the  
13 unwieldy Read codes system makes analysis difficult, and we observed significant differences across  
14 sites in reporting patterns. However, the potential improvement in case finding, especially among  
15 patients with lower rates of utilization in the pre-period, suggests these barriers are worth confronting.  
16 Our development of new variables beyond those included in prior predictive modeling efforts [8]  
17 contributed substantially to enhanced case finding, and further work on variable development is likely to  
18 lead to further improvements. Again, these data are also useful in providing descriptive information on  
19 high risk patients to help in intervention design (e.g. documenting potential targets of opportunity such  
20 as uncontrolled hypertension or diabetes).

21  
22 This study does not provide definitive findings on the value of developing individual site models  
23 compared to simply applying coefficients from multi-site or national model coefficients to local data.  
24 Our four-site regression models generally had comparable PPVs to individual site models, but for the  
25 majority of sites (but not all) the four-site regression approach correctly identified somewhat fewer  
26 number patients with future admissions. Our analysis is somewhat limited by the small number of sites  
27 involved which might cause somewhat greater variability in regression coefficients (regression  
28 coefficients for each of the five four-site models are available at <http://www.nuffieldtrust.org.uk/> ).  
29 Development of a national model using SUS data only is planned to further assess the need/value of  
30 locally developed models.

31  
32 Finally, it is worthy of note that use of the GP registry data for the denominator also proved to be of  
33 significant importance. Many prior predictive modeling efforts have been limited to patients with  
34 utilization history in whatever data sets were included. By including all patients in an area, not just  
35 those with prior use, the impact on predictive modeling of prior use was apparently enhanced. As a  
36  
37  
38  
39  
40  
41  
42  
43  
44  
45  
46  
47  
48  
49  
50  
51  
52  
53  
54  
55  
56  
57  
58  
59  
60

1  
2  
3 result, patients with more moderate levels of prior use and morbidity were found to be of higher risk  
4 than patients with no prior use at all, and were often assigned higher risk scores than when the analysis  
5 included just patients who had prior use. Accordingly, the use of the GP registry as the denominator can  
6 improve rates of case finding and may permit identification of patients at earlier stages.  
7  
8  
9  
10  
11  
12  
13  
14  
15  
16  
17  
18  
19  
20  
21  
22  
23  
24  
25  
26  
27  
28  
29  
30  
31  
32  
33  
34  
35  
36  
37  
38  
39  
40  
41  
42  
43  
44  
45  
46  
47  
48  
49  
50  
51  
52  
53  
54  
55  
56  
57  
58  
59  
60

For peer review only

## Acknowledgments

The authors wish to thank all individuals in the PCTs who contributed data used for this study during the Whole Systems Demonstrator, Virtual Wards and Social care end of life studies.

## Contributors

The preparation of data sets and input variables and costs were undertaken by TG and by IB; JB did the central modelling. MB advised on the analysis and results and managed the work of the research team at the Nuffield Trust. All authors contributed to the writing of the paper. JB is the guarantor.

## Funding and disclaimer

The research received no specific grant but was funded by the Nuffield Trust. The resulting models will be used as part of the WSD trial funded by the Department of Health.

## Competing interests

All authors have completed the Unified Competing Interest form at [www.icmje.org/coi\\_disclosure.pdf](http://www.icmje.org/coi_disclosure.pdf) and declare that no authors have any relationships with any companies that might have an interest in the submitted work in the previous 3 years; none of their spouses, partners or children have any financial relationships that may be relevant to the submitted work; and no authors have any non-financial interests that may be relevant to the submitted work.

## Ethical approval

This study only involved the analysis of pseudonymous secondary data. Since there were no identifiable human subjects, ethics approval was not required for this research and informed consent was not sought.

## Provenance and peer review

Not commissioned; externally peer reviewed.

## Data sharing statement

Details of the derived models variables and definitions are available from the authors at the Nuffield trust at [research@nuffieldtrust.org.uk](mailto:research@nuffieldtrust.org.uk).

## References

- 1 Section 3025 of the Affordable Care Act added section 1886(q) to the Social Security Act establishing the Hospital Readmissions Reduction Program, which requires the Center for Medicare and Medicaid Services to reduce Medicare payments to hospitals with excess rates of readmissions for selected conditions within 30 days of discharge.
- 2 Department of Health. Payment by Results Guidance for 2012-13. 2012. Gateway reference 17250 London: Department of Health
- 3 Kansagara D, Englander H, Salanitro A, Kagen D, Theobald C, Freeman M, Kripalani S Risk prediction models for hospital readmission: A systematic review. *JAMA* 2011;306(15):1688-1698
- 4 Billings J, Mijanovich T. Improving the Management of Care for High Cost Medicaid Patients. *Health Affairs*. 2007;26(6):1643-1655.
- 5 Billings J, Dixon J, Wennberg D, et al. Case Finding for Patients at Risk of Re-Hospitalisation: Development of an Algorithm to Identify High Risk Patients. *BMJ* 2006;333(7563):327-32,
- 6 Case Finding Algorithms for Patients at Risk of Re-hospitalisation: PARR1 and PARR 2. Kings Fund, February, 2006 ([http://www.kingsfund.org.uk/sites/files/kf/field/field\\_document/PARR-case-finding-algorithms-feb06.pdf](http://www.kingsfund.org.uk/sites/files/kf/field/field_document/PARR-case-finding-algorithms-feb06.pdf) - last accessed 04/06/2013).
- 7 Lewis G, Curry N and Bardsley M Choosing a predictive risk model: a guide for commissioners in England
- 8 Combined Predictive Model: Final Report. Kings Fund, Dec 2006. ([http://www.kingsfund.org.uk/sites/files/kf/field/field\\_document/PARR-combined-predictive-model-final-report-dec06.pdf](http://www.kingsfund.org.uk/sites/files/kf/field/field_document/PARR-combined-predictive-model-final-report-dec06.pdf) last accessed 04/06/2013),
- 9 Wales Predictive Model: Final Report and Technical Documentation, 2008 (<http://www.nliah.com/portal/microsites/Uploads/Resources/k5cma8PPy.pdf> last accessed 04/06/2013).
- 10 <http://systems.hscic.gov.uk/data/uktc/readcodes> - last accessed 14/05/2013
- 11 <http://www.connectingforhealth.nhs.uk/systemsandservices/sus> - last accessed 14/1/2013.
- 12 Charlson ME, Popei P, Ales KL, et al. A new method of classifying prognostic comorbidity in longitudinal studies: development and validation. *Journal of Chronic Disease*. 1987;40:373-383.
- 13 Dixon J, Smith P, Gravelle H, Martin S, Bardsley M, Rice H, Georghiou T, Dusheiko M, Billings J, De Lorenzo M. I. A person based formula for allocating commissioning funds to general practices in England: development of a statistical model *BMJ* 2011;343:d6608 doi: 10.1136/bmj.d6608 Published 22 November 2011.
- 14 Chenore T, Pereira Gray DJ, Forrer J, Wright C., Evans PH, Emergency hospital admissions for the elderly: insights from the Devon Predictive Model *J Public Health* (2013)
- 15 Raven M, Billings J, Goldfrank L, Manheimer E, Gourevitch M. Medicaid Patients at High Risk for Frequent Hospital Admission: Real-time Identification and Remedial Risks. *Journal of Urban Health*. 2009;86(2):230-241.

## Appendix A. PPV and sensitivity IPAEOP and IPAEOPGP models. Individual site runs.

| Risk Score<br>Threshold | IP+AE+OP Data |             |          |             |       |             |         |             |           |             |
|-------------------------|---------------|-------------|----------|-------------|-------|-------------|---------|-------------|-----------|-------------|
|                         | Newham        |             | Cornwall |             | Kent  |             | Croydon |             | Redbridge |             |
|                         | PPV           | Sensitivity | PPV      | Sensitivity | PPV   | Sensitivity | PPV     | Sensitivity | PPV       | Sensitivity |
| 1                       | 0.049         | 1.000       | 0.061    | 1.000       | 0.052 | 1.000       | 0.046   | 1.000       | 0.047     | 1.000       |
| 10                      | 0.236         | 0.361       | 0.216    | 0.391       | 0.213 | 0.339       | 0.241   | 0.378       | 0.238     | 0.425       |
| 20                      | 0.368         | 0.201       | 0.328    | 0.188       | 0.326 | 0.158       | 0.377   | 0.210       | 0.357     | 0.236       |
| 30                      | 0.450         | 0.136       | 0.406    | 0.109       | 0.401 | 0.094       | 0.444   | 0.142       | 0.420     | 0.149       |
| 40                      | 0.506         | 0.098       | 0.477    | 0.072       | 0.457 | 0.062       | 0.486   | 0.100       | 0.475     | 0.098       |
| 50                      | 0.552         | 0.071       | 0.520    | 0.047       | 0.513 | 0.043       | 0.528   | 0.073       | 0.512     | 0.067       |
| 60                      | 0.585         | 0.052       | 0.560    | 0.030       | 0.569 | 0.031       | 0.580   | 0.055       | 0.532     | 0.044       |
| 70                      | 0.632         | 0.037       | 0.622    | 0.021       | 0.618 | 0.022       | 0.610   | 0.040       | 0.555     | 0.028       |
| 80                      | 0.678         | 0.024       | 0.655    | 0.013       | 0.673 | 0.014       | 0.659   | 0.028       | 0.571     | 0.016       |
| 90                      | 0.717         | 0.013       | 0.692    | 0.007       | 0.724 | 0.008       | 0.710   | 0.016       | 0.617     | 0.008       |
| Top 1%                  | 0.501         | 0.102       | 0.470    | 0.077       | 0.417 | 0.080       | 0.482   | 0.106       | 0.474     | 0.101       |
| Top 5%                  | 0.287         | 0.291       | 0.292    | 0.240       | 0.259 | 0.249       | 0.290   | 0.318       | 0.296     | 0.316       |

  

| Risk Score<br>Threshold | IP+AE+OP+GP Data |             |          |             |       |             |         |             |           |             |
|-------------------------|------------------|-------------|----------|-------------|-------|-------------|---------|-------------|-----------|-------------|
|                         | Newham           |             | Cornwall |             | Kent  |             | Croydon |             | Redbridge |             |
|                         | PPV              | Sensitivity | PPV      | Sensitivity | PPV   | Sensitivity | PPV     | Sensitivity | PPV       | Sensitivity |
| 1                       | 0.049            | 1.000       | 0.061    | 1.000       | 0.052 | 1.000       | 0.046   | 1.000       | 0.047     | 1.000       |
| 10                      | 0.228            | 0.410       | 0.213    | 0.439       | 0.210 | 0.392       | 0.237   | 0.452       | 0.237     | 0.457       |
| 20                      | 0.360            | 0.235       | 0.323    | 0.232       | 0.314 | 0.194       | 0.358   | 0.267       | 0.348     | 0.272       |
| 30                      | 0.439            | 0.152       | 0.410    | 0.136       | 0.397 | 0.113       | 0.442   | 0.174       | 0.423     | 0.172       |
| 40                      | 0.499            | 0.103       | 0.481    | 0.084       | 0.459 | 0.072       | 0.494   | 0.114       | 0.482     | 0.113       |
| 50                      | 0.566            | 0.074       | 0.545    | 0.053       | 0.521 | 0.048       | 0.550   | 0.079       | 0.522     | 0.073       |
| 60                      | 0.606            | 0.052       | 0.602    | 0.033       | 0.580 | 0.032       | 0.589   | 0.052       | 0.563     | 0.047       |
| 70                      | 0.657            | 0.036       | 0.659    | 0.021       | 0.644 | 0.021       | 0.643   | 0.035       | 0.616     | 0.030       |
| 80                      | 0.723            | 0.021       | 0.714    | 0.013       | 0.694 | 0.013       | 0.694   | 0.021       | 0.651     | 0.018       |
| 90                      | 0.766            | 0.012       | 0.745    | 0.006       | 0.752 | 0.007       | 0.735   | 0.011       | 0.655     | 0.007       |
| Top 1%                  | 0.504            | 0.102       | 0.490    | 0.081       | 0.438 | 0.084       | 0.502   | 0.110       | 0.487     | 0.104       |
| Top 5%                  | 0.296            | 0.300       | 0.309    | 0.254       | 0.272 | 0.262       | 0.307   | 0.337       | 0.312     | 0.333       |

## Appendix B Regression coefficients. IPAEOP and IPAEOPGP models. Individual site runs.

|                                                    | IP+AE+OP Data |        |        |        |        | IP+AE+OP+GP Data |        |        |        |        |
|----------------------------------------------------|---------------|--------|--------|--------|--------|------------------|--------|--------|--------|--------|
|                                                    | NH            | CW     | KT     | CR     | RB     | NH               | CW     | KT     | CR     | RB     |
| Age                                                | 0.015         | 0.003  | 0.009  | 0.010  | 0.019  | 0.001            | -0.004 | 0.002  | 0.001  | 0.009  |
| Age 65-74                                          | 0.280         | 0.409  | 0.295  | 0.380  | 0.261  | 0.236            | 0.276  | 0.203  | 0.244  | 0.245  |
| Age 75-84                                          | 0.738         | 0.905  | 0.731  | 0.847  | 0.734  | 0.721            | 0.672  | 0.605  | 0.708  | 0.749  |
| Age 85+                                            | 1.076         | 1.483  | 1.226  | 1.178  | 1.109  | 1.150            | 1.206  | 1.086  | 1.187  | 1.213  |
| Female                                             | 0.239         | 0.002  | 0.044  | 0.178  | 0.058  | 0.114            | -0.095 | -0.075 | -0.014 | -0.030 |
| Practice IMD                                       | 0.013         | 0.003  | 0.016  | 0.018  | 0.012  | 0.008            | 0.004  | 0.017  | 0.010  | 0.015  |
| Months registered 1 yr prior                       | 0.014         | -0.011 | -0.005 | -0.018 | -0.013 | 0.011            | -0.011 | -0.003 | -0.010 | -0.006 |
| Months registered 2 yrs prior                      | 0.022         | -0.019 | -0.016 | -0.007 | -0.023 | -0.021           | -0.024 | -0.019 | -0.011 | -0.021 |
| EM Adms prior 0-90 days                            | 0.382         | 0.471  | 0.321  | 0.310  | 0.282  | 0.367            | 0.420  | 0.283  | 0.269  | 0.259  |
| EL Adms prior 0-90 days                            | 0.045         | 0.216  | 0.155  | 0.153  | 0.148  | 0.033            | 0.159  | 0.074  | 0.097  | 0.069  |
| Any attender prior 0-90 days                       | 0.115         | 0.027  | 0.001  | 0.041  | 0.073  | 0.135            | 0.026  | 0.010  | 0.042  | 0.064  |
| Any day case prior 0-90 days                       | 0.094         | 0.234  | 0.110  | 0.111  | 0.251  | 0.037            | 0.173  | 0.039  | -0.019 | 0.130  |
| EM Adms prior 91-180 days                          | 0.215         | 0.310  | 0.351  | 0.282  | 0.185  | 0.217            | 0.262  | 0.297  | 0.243  | 0.160  |
| EL Adms prior 91-180 days                          | 0.321         | 0.150  | 0.062  | 0.204  | 0.081  | 0.283            | 0.128  | 0.027  | 0.118  | 0.024  |
| EM Adms prior 181-365 days                         | 0.113         | 0.345  | 0.350  | 0.248  | 0.146  | 0.124            | 0.289  | 0.292  | 0.227  | 0.129  |
| EL Adms prior 181-365 days                         | 0.097         | 0.120  | 0.104  | 0.118  | 0.170  | 0.072            | 0.079  | 0.060  | 0.035  | 0.108  |
| Em Adms 2 yrs prior                                | 0.102         | 0.269  | 0.307  | 0.181  | 0.143  | 0.116            | 0.216  | 0.250  | 0.178  | 0.149  |
| Any day case 2 yrs prior                           | 0.096         | 0.157  | 0.186  | 0.151  | 0.179  | 0.058            | 0.092  | 0.112  | 0.005  | 0.103  |
| DX MI                                              | 0.108         | 0.097  | -0.105 | -0.004 | 0.376  | -0.197           | -0.003 | -0.163 | -0.111 | 0.228  |
| DX CHF                                             | 0.348         | -0.070 | -0.246 | -0.069 | -0.337 | -0.370           | -0.178 | -0.269 | -0.110 | -0.216 |
| DX CVD                                             | 0.296         | 0.227  | 0.033  | 0.037  | -0.040 | 0.269            | 0.166  | -0.001 | -0.099 | -0.061 |
| CD CTD                                             | 0.030         | -0.024 | 0.101  | -0.380 | -0.029 | 0.071            | -0.192 | -0.010 | -0.427 | -0.039 |
| DX PVD                                             | 0.245         | 0.124  | 0.099  | -0.100 | 0.021  | -0.253           | 0.048  | 0.026  | -0.096 | 0.003  |
| DX Asthma                                          | 0.082         | 0.143  | 0.184  | 0.099  | 0.192  | -0.114           | -0.107 | -0.023 | -0.081 | 0.028  |
| DX COPD                                            | 0.204         | 0.251  | 0.277  | 0.193  | 0.123  | -0.169           | -0.139 | -0.036 | -0.330 | -0.269 |
| DX Diabetes                                        | 0.240         | 0.303  | 0.285  | 0.253  | 0.276  | -0.046           | -0.052 | -0.016 | -0.124 | 0.011  |
| DX Diabetes with complications                     | 0.059         | -0.221 | 0.062  | -0.014 | 0.334  | 0.062            | -0.176 | 0.095  | 0.004  | 0.262  |
| DX Renal Disease                                   | 0.408         | 0.022  | 0.085  | 0.128  | 0.199  | 0.356            | 0.005  | 0.073  | 0.063  | 0.120  |
| DX Cancer                                          | 0.165         | -0.019 | -0.062 | -0.308 | 0.041  | 0.041            | 0.098  | -0.010 | -0.207 | 0.034  |
| DX Mental                                          | 0.498         | 0.316  | 0.363  | 0.484  | 0.077  | 0.340            | 0.131  | 0.111  | 0.266  | -0.061 |
| DX Alcohol                                         | 0.569         | 0.684  | 0.578  | 0.673  | 0.974  | 0.281            | 0.530  | 0.357  | 0.409  | 0.754  |
| DX Dementia                                        | 0.548         | -0.589 | -0.551 | -0.402 | -0.596 | -0.530           | -0.486 | -0.440 | -0.669 | -0.641 |
| DX Cognitive Impairment                            | 0.117         | 0.016  | 0.025  | 0.110  | 0.187  | -0.075           | 0.046  | 0.031  | 0.088  | 0.152  |
| DX ACS Condition                                   | 0.364         | 0.270  | 0.239  | 0.267  | 0.306  | 0.269            | 0.161  | 0.134  | 0.114  | 0.224  |
| Charlson Index                                     | 0.055         | 0.063  | 0.060  | 0.101  | 0.025  | 0.048            | 0.062  | 0.037  | 0.086  | 0.029  |
| AE visits prior 0-90 days                          | 0.236         | 0.267  | 0.355  | 0.309  | 0.359  | 0.179            | 0.230  | 0.265  | 0.199  | 0.260  |
| AE unplanned follow-up visits prior 0-90 days      | 0.094         | -0.583 | -0.533 | -0.874 | -0.383 | -0.107           | -0.566 | -0.452 | -0.703 | -0.315 |
| AE X-ray prior 0-90 days                           | 0.348         | 0.437  | 0.058  | 0.104  | 0.367  | 0.303            | 0.382  | 0.027  | 0.040  | 0.317  |
| AE visits prior 91-180 days                        | 0.265         | 0.262  | 0.220  | 0.225  | 0.277  | 0.197            | 0.225  | 0.165  | 0.142  | 0.210  |
| AE unplanned follow-up visits prior 91-180 days    | 0.023         | -0.560 | -0.229 | -0.296 | -0.298 | -0.026           | -0.543 | -0.177 | -0.225 | -0.286 |
| AE X-ray prior 91-180 days                         | 0.227         | 0.117  | 0.120  | 0.346  | -0.064 | 0.210            | 0.015  | 0.101  | 0.237  | 0.010  |
| AE visits prior 181-365 days                       | 0.264         | 0.205  | 0.135  | 0.171  | 0.181  | 0.216            | 0.174  | 0.090  | 0.115  | 0.138  |
| AE unplanned follow-up visits prior 181-365 days   | 0.251         | -0.490 | -0.184 | -0.261 | -0.203 | -0.214           | -0.449 | -0.131 | -0.175 | -0.221 |
| AE X-ray prior 181-365 days                        | 0.262         | -0.040 | 0.281  | 0.324  | 0.110  | 0.225            | 0.085  | 0.251  | 0.244  | 0.072  |
| AE visits 2 yrs prior                              | 0.211         | 0.159  | 0.154  | 0.140  | 0.160  | 0.170            | 0.138  | 0.114  | 0.077  | 0.121  |
| AE unplanned follow-up visits 2 yrs prior          | 0.307         | -0.352 | -0.239 | -0.433 | -0.339 | -0.228           | -0.317 | -0.178 | -0.262 | -0.288 |
| AE X-ray 2yrs prior                                | 0.083         | 0.231  | 0.100  | 0.128  | 0.179  | 0.063            | 0.390  | 0.082  | 0.069  | 0.152  |
| Outpatient specialty visits prior 0-90 days        | 0.046         | 0.055  | 0.091  | 0.061  | 0.059  | 0.025            | 0.033  | 0.047  | 0.030  | 0.027  |
| Outpatient specialty visits missed prior 0-90 days | 0.155         | 0.182  | 0.250  |        | 0.146  | 0.108            | 0.118  | 0.171  |        | 0.097  |
| Outpatient specialty visits prior 91-180 days      | 0.030         | 0.013  | 0.023  | 0.034  | 0.029  | 0.007            | 0.003  | -0.004 | 0.015  | 0.011  |
| Outpatient specialty visits missed                 | 0.113         | 0.239  | 0.168  |        | 0.193  | 0.087            | 0.184  | 0.113  |        | 0.159  |

|    |                                       |       |        |        |        |        |        |        |        |        |        |
|----|---------------------------------------|-------|--------|--------|--------|--------|--------|--------|--------|--------|--------|
| 1  | prior 91-180 days                     |       |        |        |        |        |        |        |        |        |        |
| 2  | Outpatient specialty visits prior     | 0.016 | 0.010  | -0.005 | 0.019  | 0.031  | -0.003 | 0.001  | -0.024 | 0.003  | 0.018  |
| 3  | 181-365 days                          |       |        |        |        |        |        |        |        |        |        |
| 4  | Outpatient specialty visits missed    | 0.128 | 0.164  | 0.075  |        | 0.140  | 0.086  | 0.095  | 0.036  |        | 0.122  |
| 5  | prior 181-365 days                    |       |        |        |        |        |        |        |        |        |        |
| 6  | Outpatient specialty visits 2 yrs     | 0.019 | 0.030  | 0.014  | 0.028  | 0.019  | 0.008  | 0.014  | -0.009 | 0.011  | 0.021  |
| 7  | prior                                 |       |        |        |        |        |        |        |        |        |        |
| 8  | Outpatient specialty visits missed 2  | 0.142 | 0.162  | 0.140  | 0.190  | 0.082  | 0.097  | 0.090  | 0.085  | 0.129  | 0.057  |
| 9  | yrs prior                             |       |        |        |        |        |        |        |        |        |        |
| 10 | GP DX COPD                            |       |        |        |        |        | 0.218  | 0.174  | 0.112  | 0.287  | 0.295  |
| 11 | GP - 1 long term condition            |       |        |        |        |        | 0.131  | 0.025  | 0.017  | 0.106  | 0.192  |
| 12 | GP - 2 or more long term              |       |        |        |        |        | 0.166  | 0.109  | 0.038  | 0.070  | 0.182  |
| 13 | conditions                            |       |        |        |        |        |        |        |        |        |        |
| 14 | GP - Glomerular filtration rate       |       |        |        |        |        | -0.075 | 0.092  | -0.017 |        | 0.050  |
| 15 | group 3 last 0-365 days               |       |        |        |        |        |        |        |        |        |        |
| 16 | GP - 10+ unique drugs prescribed      |       |        |        |        |        | 0.342  | 0.570  | 0.166  | 2.741  | 1.949  |
| 17 | GP - 5-9 unique drugs prescribed      |       |        |        |        |        | 0.424  | 0.444  | 0.164  | 2.804  | 1.953  |
| 18 | GP - 0-4 unique drugs prescribed      |       |        |        |        |        | 0.328  | 0.254  | 0.114  | 2.559  | 1.809  |
| 19 | GP - Psychoactive substance           |       |        |        |        |        | 0.388  | 0.323  | 0.583  | 0.431  | 0.810  |
| 20 | misuse disorder                       |       |        |        |        |        |        |        |        |        |        |
| 21 | GP - 7+ distinct disorders            |       |        |        |        |        | -0.049 | 0.057  | 0.017  | -0.163 | -0.062 |
| 22 | GP - GP visits prior 0-3 months       |       |        |        |        |        | -0.001 | 0.008  | 0.022  | 0.021  | 0.042  |
| 23 | GP - GP visits prior 4-6 months       |       |        |        |        |        | 0.015  | 0.004  | 0.012  | 0.009  | 0.019  |
| 24 | GP - GP visits prior 7-12 months      |       |        |        |        |        | 0.005  | 0.003  | 0.007  | 0.000  | 0.008  |
| 25 | GP - GP visits 2yrs prior             |       |        |        |        |        | 0.000  | 0.002  | 0.004  | 0.006  | 0.002  |
| 26 | GP - Increasing rate of GP visits     |       |        |        |        |        | 0.184  | 0.087  | 0.126  | 0.207  | 0.094  |
| 27 | during last 12 months                 |       |        |        |        |        |        |        |        |        |        |
| 28 | GP - Number of high risk BNFs         |       |        |        |        |        | 0.063  | 0.006  | -0.036 | -0.026 | -0.075 |
| 29 | GP - Any high risk                    |       |        |        |        |        | 0.219  | 0.202  | 0.241  | 0.324  | 0.249  |
| 30 | GP - Count of BNF chapters            |       |        |        |        |        | 0.066  | 0.053  | 0.059  | 0.066  | -0.024 |
| 31 | GP - DX Dementia                      |       |        |        |        |        | 0.421  | 0.266  | 0.296  | 0.471  | 0.437  |
| 32 | GP - Exception reported from          |       |        |        |        |        | 0.157  | 0.108  | 0.111  | 0.118  | 0.132  |
| 33 | quality indicators                    |       |        |        |        |        |        |        |        |        |        |
| 34 | GP - Health visitor or district nurse |       |        |        |        |        | 0.278  | 0.244  | 0.199  | 0.168  | 0.184  |
| 35 | visit                                 |       |        |        |        |        |        |        |        |        |        |
| 36 | GP - Record of IHD/angina             |       |        |        |        |        | 0.069  | -0.048 | 0.110  | -0.062 | 0.081  |
| 37 | GP - Nebuliser used                   |       |        |        |        |        | 0.113  | 0.315  | 0.207  | 0.191  | 0.448  |
| 38 | GP - Salbutamol prescribed            |       |        |        |        |        | 0.021  | 0.017  | 0.074  | 0.000  | -0.011 |
| 39 | GP - Warfarin prescribed              |       |        |        |        |        | -0.041 | 0.031  | -0.026 | -0.100 | -0.244 |
| 40 | GP - High blood pressure              |       |        |        |        |        | -0.040 | -0.001 | -0.013 | -0.048 | -0.087 |
| 41 | GP - Smoker                           |       |        |        |        |        | 0.298  | 0.231  | 0.248  | 0.240  | 0.220  |
| 42 | GP - BMI 30+                          |       |        |        |        |        | 0.050  | 0.002  | 0.085  | 0.046  | 0.199  |
| 43 | GP - HbA1c > 10                       |       |        |        |        |        | 0.236  | 0.270  | 0.210  | 0.362  | 0.354  |
| 44 | GD - QOF ARTF                         |       |        |        |        |        | 0.176  | 0.064  | 0.095  | -0.047 | 0.143  |
| 45 | GP - QOF CKD                          |       |        |        |        |        | 0.206  | -0.003 | -0.037 | 0.091  | 0.210  |
| 46 | GP - QOF Depression                   |       |        |        |        |        | 0.069  | 0.248  | 0.183  | 0.133  | 0.186  |
| 47 | GP - Number of QOF DX categories      |       |        |        |        |        | 0.003  | -0.023 | -0.072 | -0.135 | -0.009 |
| 48 | 3+                                    |       |        |        |        |        |        |        |        |        |        |
| 49 | GP - Number of phone contacts last    |       |        |        |        |        | -0.004 | 0.046  | 0.004  | -0.005 | -0.004 |
| 50 | 0-3 months                            |       |        |        |        |        |        |        |        |        |        |
| 51 | Constant                              | 4.665 | -3.262 | -3.987 | -4.363 | -4.368 | -4.381 | -3.275 | -4.069 | -6.497 | -5.939 |

## Appendix C Regression significance levels. IPAEOP and IPAEOPGP models. Individual site runs.

|                                                       | IP+AE+OP Data |       |       |       |       | IP+AE+OP+GP Data |       |       |       |       |
|-------------------------------------------------------|---------------|-------|-------|-------|-------|------------------|-------|-------|-------|-------|
|                                                       | NH            | CW    | KT    | CR    | RB    | NH               | CW    | KT    | CR    | RB    |
| Age                                                   | 0.000         | 0.000 | 0.000 | 0.000 | 0.000 | 0.344            | 0.000 | 0.001 | 0.158 | 0.000 |
| Age 65-74                                             | 0.000         | 0.000 | 0.000 | 0.000 | 0.000 | 0.000            | 0.000 | 0.000 | 0.000 | 0.000 |
| Age 75-84                                             | 0.000         | 0.000 | 0.000 | 0.000 | 0.000 | 0.000            | 0.000 | 0.000 | 0.000 | 0.000 |
| Age 85+                                               | 0.000         | 0.000 | 0.000 | 0.000 | 0.000 | 0.000            | 0.000 | 0.000 | 0.000 | 0.000 |
| Female                                                | 0.007         | 0.897 | 0.000 | 0.001 | 0.125 | 0.000            | 0.000 | 0.000 | 0.466 | 0.165 |
| Practice IMD                                          | 0.008         | 0.036 | 0.000 | 0.000 | 0.000 | 0.015            | 0.010 | 0.000 | 0.000 | 0.000 |
| Months registered 1 yr prior                          | 0.002         | 0.006 | 0.085 | 0.247 | 0.047 | 0.009            | 0.011 | 0.387 | 0.026 | 0.255 |
| Months registered 2 yrs prior                         | 0.001         | 0.014 | 0.006 | 0.232 | 0.276 | 0.009            | 0.003 | 0.001 | 0.211 | 0.025 |
| EM Adms prior 0-90 days                               | 0.000         | 0.000 | 0.000 | 0.000 | 0.000 | 0.000            | 0.000 | 0.000 | 0.000 | 0.000 |
| EL Adms prior 0-90 days                               | 0.664         | 0.000 | 0.000 | 0.029 | 0.081 | 0.714            | 0.000 | 0.070 | 0.102 | 0.373 |
| Any attender prior 0-90 days                          | 0.002         | 0.000 | 0.955 | 0.006 | 0.004 | 0.001            | 0.000 | 0.489 | 0.005 | 0.008 |
| Any day case prior 0-90 days                          | 0.769         | 0.000 | 0.001 | 0.682 | 0.001 | 0.561            | 0.000 | 0.233 | 0.699 | 0.015 |
| EM Adms prior 91-180 days                             | 0.000         | 0.000 | 0.000 | 0.000 | 0.000 | 0.000            | 0.000 | 0.000 | 0.000 | 0.002 |
| EL Adms prior 91-180 days                             | 0.000         | 0.000 | 0.068 | 0.022 | 0.528 | 0.000            | 0.001 | 0.437 | 0.016 | 0.680 |
| EM Adms prior 181-365 days                            | 0.000         | 0.000 | 0.000 | 0.000 | 0.000 | 0.001            | 0.000 | 0.000 | 0.000 | 0.000 |
| EL Adms prior 181-365 days                            | 0.548         | 0.000 | 0.000 | 0.757 | 0.019 | 0.167            | 0.009 | 0.030 | 0.372 | 0.014 |
| Em Adms 2 yrs prior                                   | 0.000         | 0.000 | 0.000 | 0.000 | 0.000 | 0.000            | 0.000 | 0.000 | 0.000 | 0.000 |
| Any day case 2 yrs prior                              | 0.877         | 0.000 | 0.000 | 0.536 | 0.035 | 0.177            | 0.000 | 0.000 | 0.864 | 0.005 |
| DX MI                                                 | 0.366         | 0.134 | 0.049 | 0.611 | 0.000 | 0.076            | 0.966 | 0.002 | 0.216 | 0.017 |
| DX CHF                                                | 0.024         | 0.253 | 0.000 | 0.448 | 0.008 | 0.001            | 0.005 | 0.000 | 0.194 | 0.026 |
| DX CVD                                                | 0.015         | 0.000 | 0.446 | 0.610 | 0.571 | 0.013            | 0.002 | 0.977 | 0.179 | 0.504 |
| CD CTD                                                | 0.263         | 0.756 | 0.150 | 0.010 | 0.759 | 0.645            | 0.013 | 0.891 | 0.000 | 0.766 |
| DX PVD                                                | 0.230         | 0.061 | 0.097 | 0.567 | 0.665 | 0.079            | 0.462 | 0.661 | 0.270 | 0.982 |
| DX Asthma                                             | 0.351         | 0.002 | 0.000 | 0.241 | 0.015 | 0.135            | 0.024 | 0.580 | 0.184 | 0.698 |
| DX COPD                                               | 0.005         | 0.000 | 0.000 | 0.009 | 0.098 | 0.098            | 0.021 | 0.483 | 0.002 | 0.041 |
| DX Diabetes                                           | 0.000         | 0.000 | 0.000 | 0.000 | 0.000 | 0.444            | 0.227 | 0.649 | 0.016 | 0.845 |
| DX Diabetes with complications                        | 0.478         | 0.025 | 0.540 | 0.363 | 0.013 | 0.674            | 0.073 | 0.347 | 0.973 | 0.083 |
| DX Renal Disease                                      | 0.000         | 0.731 | 0.142 | 0.068 | 0.025 | 0.001            | 0.942 | 0.208 | 0.405 | 0.210 |
| DX Cancer                                             | 0.753         | 0.751 | 0.271 | 0.001 | 0.421 | 0.727            | 0.104 | 0.862 | 0.009 | 0.721 |
| DX Mental                                             | 0.000         | 0.000 | 0.000 | 0.000 | 0.370 | 0.000            | 0.005 | 0.008 | 0.000 | 0.447 |
| DX Alcohol                                            | 0.000         | 0.000 | 0.000 | 0.000 | 0.000 | 0.029            | 0.000 | 0.000 | 0.000 | 0.000 |
| DX Dementia                                           | 0.005         | 0.000 | 0.000 | 0.000 | 0.000 | 0.004            | 0.000 | 0.000 | 0.000 | 0.000 |
| DX Cognitive Impairment                               | 0.430         | 0.804 | 0.620 | 0.191 | 0.026 | 0.456            | 0.474 | 0.534 | 0.199 | 0.080 |
| DX ACS Condition                                      | 0.000         | 0.000 | 0.000 | 0.000 | 0.000 | 0.000            | 0.000 | 0.000 | 0.001 | 0.000 |
| Charlson Index                                        | 0.012         | 0.000 | 0.000 | 0.000 | 0.212 | 0.042            | 0.000 | 0.006 | 0.000 | 0.160 |
| AE visits prior 0-90 days                             | 0.000         | 0.000 | 0.000 | 0.000 | 0.000 | 0.000            | 0.000 | 0.000 | 0.000 | 0.000 |
| AE unplanned follow-up visits prior 0-90 days         | 0.895         | 0.001 | 0.000 | 0.000 | 0.133 | 0.654            | 0.001 | 0.000 | 0.000 | 0.121 |
| AE X-ray prior 0-90 days                              | 0.002         | 0.000 | 0.301 | 0.374 | 0.052 | 0.004            | 0.002 | 0.636 | 0.662 | 0.035 |
| AE visits prior 91-180 days                           | 0.000         | 0.000 | 0.000 | 0.000 | 0.000 | 0.000            | 0.000 | 0.000 | 0.000 | 0.000 |
| AE unplanned follow-up visits prior 91-180 days       | 0.836         | 0.000 | 0.000 | 0.149 | 0.130 | 0.899            | 0.000 | 0.005 | 0.214 | 0.055 |
| AE X-ray prior 91-180 days                            | 0.070         | 0.582 | 0.045 | 0.002 | 0.672 | 0.062            | 0.946 | 0.090 | 0.009 | 0.985 |
| AE visits prior 181-365 days                          | 0.000         | 0.000 | 0.000 | 0.000 | 0.000 | 0.000            | 0.000 | 0.000 | 0.000 | 0.000 |
| AE unplanned follow-up visits prior 181-365 days      | 0.182         | 0.000 | 0.001 | 0.122 | 0.124 | 0.098            | 0.001 | 0.013 | 0.127 | 0.041 |
| AE X-ray prior 181-365 days                           | 0.000         | 0.936 | 0.000 | 0.000 | 0.461 | 0.001            | 0.866 | 0.000 | 0.000 | 0.485 |
| AE visits 2 yrs prior                                 | 0.000         | 0.000 | 0.000 | 0.000 | 0.000 | 0.000            | 0.000 | 0.000 | 0.000 | 0.000 |
| AE unplanned follow-up visits 2 yrs prior             | 0.021         | 0.008 | 0.000 | 0.003 | 0.009 | 0.020            | 0.016 | 0.000 | 0.008 | 0.005 |
| AE X-ray 2yrs prior                                   | 0.183         | 0.555 | 0.019 | 0.022 | 0.005 | 0.210            | 0.320 | 0.048 | 0.161 | 0.006 |
| Outpatient specialty visits prior 0-90 days           | 0.000         | 0.000 | 0.000 | 0.000 | 0.000 | 0.000            | 0.000 | 0.000 | 0.000 | 0.000 |
| Outpatient specialty visits missed prior 0-90 days    | 0.000         | 0.000 | 0.000 | 0.000 | 0.002 | 0.000            | 0.000 | 0.000 | 0.000 | 0.008 |
| Outpatient specialty visits prior 91-180 days         | 0.196         | 0.043 | 0.003 | 0.002 | 0.016 | 0.516            | 0.630 | 0.648 | 0.054 | 0.184 |
| Outpatient specialty visits missed prior 91-180 days  | 0.027         | 0.000 | 0.000 | 0.000 | 0.000 | 0.039            | 0.000 | 0.002 | 0.000 | 0.000 |
| Outpatient specialty visits prior 181-365 days        | 0.763         | 0.009 | 0.400 | 0.094 | 0.000 | 0.595            | 0.844 | 0.000 | 0.491 | 0.002 |
| Outpatient specialty visits missed prior 181-365 days | 0.000         | 0.000 | 0.009 | 0.000 | 0.000 | 0.001            | 0.002 | 0.206 | 0.000 | 0.000 |
| Outpatient specialty visits 2 yrs prior               | 0.000         | 0.000 | 0.000 | 0.000 | 0.000 | 0.068            | 0.000 | 0.046 | 0.001 | 0.000 |
| Outpatient specialty visits missed 2 yrs prior        | 0.000         | 0.000 | 0.000 | 0.000 | 0.001 | 0.000            | 0.006 | 0.000 | 0.000 | 0.000 |
| GP DX COPD                                            | 0.002         | 0.000 | 0.001 | 0.000 | 0.003 | 0.002            | 0.000 | 0.001 | 0.000 | 0.003 |



|    |                                       |       |       |       |       |       |
|----|---------------------------------------|-------|-------|-------|-------|-------|
| 1  | GP - 1 long term condition            | 0.000 | 0.229 | 0.310 | 0.000 | 0.000 |
| 2  | GP - 2 or more long term conditions   | 0.001 | 0.000 | 0.100 | 0.098 | 0.000 |
| 3  | GP - Glomerular filtration rate       |       |       |       |       |       |
| 4  | group 3 last 0-365 days               | 0.097 | 0.002 | 0.463 |       | 0.162 |
| 5  | GP - 10+ unique drugs prescribed      | 0.000 | 0.000 | 0.000 | 0.000 | 0.000 |
| 6  | GP - 5-9 unique drugs prescribed      | 0.000 | 0.000 | 0.000 | 0.000 | 0.000 |
| 7  | GP - 0-4 unique drugs prescribed      | 0.000 | 0.000 | 0.000 | 0.000 | 0.000 |
| 8  | GP - Psychoactive substance           |       |       |       |       |       |
| 9  | misuse disorder                       | 0.000 | 0.000 | 0.000 | 0.000 | 0.000 |
| 10 | GP - 7+ distinct disorders            | 0.311 | 0.290 | 0.523 | 0.002 | 0.263 |
| 11 | GP visits prior 0-3 months            | 0.873 | 0.002 | 0.000 | 0.000 | 0.000 |
| 12 | GP visits prior 4-6 months            | 0.000 | 0.182 | 0.000 | 0.008 | 0.000 |
| 13 | GP visits prior 7-12 months           | 0.075 | 0.136 | 0.000 | 0.987 | 0.006 |
| 14 | GP visits 2yrs prior                  | 0.934 | 0.013 | 0.000 | 0.000 | 0.263 |
| 15 | GP - Increasing rate of GP visits     |       |       |       |       |       |
| 16 | during last 12 months                 | 0.000 | 0.001 | 0.000 | 0.000 | 0.010 |
| 17 | GP - Number of high risk BNFs         | 0.009 | 0.691 | 0.004 | 0.216 | 0.002 |
| 18 | GP - Any high risk                    | 0.000 | 0.000 | 0.000 | 0.000 | 0.000 |
| 19 | GP - Count of BNF chapters            | 0.000 | 0.000 | 0.000 | 0.000 | 0.000 |
| 20 | GP - DX Dementia                      | 0.000 | 0.000 | 0.000 | 0.000 | 0.000 |
| 21 | GP - Exception reported from          |       |       |       |       |       |
| 22 | quality indicators                    | 0.020 | 0.003 | 0.001 | 0.020 | 0.062 |
| 23 | GP - Health visitor or district nurse |       |       |       |       |       |
| 24 | visit                                 | 0.000 | 0.000 | 0.000 | 0.000 | 0.000 |
| 25 | GP - Record of IHD/angina             | 0.355 | 0.361 | 0.006 | 0.202 | 0.288 |
| 26 | GP - Nebuliser used                   | 0.359 | 0.000 | 0.001 | 0.019 | 0.001 |
| 27 | GP - Salbutamol prescribed            | 0.550 | 0.523 | 0.001 | 0.989 | 0.795 |
| 28 | GP - Warfarin prescribed              | 0.643 | 0.423 | 0.440 | 0.106 | 0.001 |
| 29 | GP - High blood pressure              | 0.269 | 0.984 | 0.549 | 0.725 | 0.325 |
| 30 | GP - Smoker                           | 0.000 | 0.000 | 0.000 | 0.000 | 0.000 |
| 31 | GP - BMI 30+                          | 0.074 | 0.956 | 0.000 | 0.074 | 0.000 |
| 32 | GP - HbA1c > 10                       | 0.000 | 0.000 | 0.000 | 0.000 | 0.000 |
| 33 | GD - QOF ARTF                         | 0.130 | 0.240 | 0.024 | 0.586 | 0.136 |
| 34 | GP - QOF CKD                          | 0.003 | 0.924 | 0.203 | 0.063 | 0.000 |
| 35 | GP - QOF Depression                   | 0.240 | 0.000 | 0.000 | 0.024 | 0.016 |
| 36 | GP - Number of QOF DX                 |       |       |       |       |       |
| 37 | categories 3+                         | 0.974 | 0.717 | 0.123 | 0.342 | 0.948 |
| 38 | GP - Number of phone contacts last    |       |       |       |       |       |
| 39 | 0-3 months                            | 0.927 | 0.000 | 0.600 | 0.788 | 0.899 |
| 40 | Constant                              | 0.000 | 0.000 | 0.000 | 0.000 | 0.000 |

**STROBE Statement— checklist of items that should be included in reports of observational studies**

Please fill out the page numbers on this form and upload the file as a supplemental file when you submit your revision

Manuscript Number \_\_\_\_\_

Indicate page number ↓  
 (Or n/a if not applicable)

|                          | Item No | Recommendation                                                                                                                                                                                                                                                                                                                                                                                                                                                         |  |
|--------------------------|---------|------------------------------------------------------------------------------------------------------------------------------------------------------------------------------------------------------------------------------------------------------------------------------------------------------------------------------------------------------------------------------------------------------------------------------------------------------------------------|--|
| Title and abstract       | 1       | (a) Indicate the study's design with a commonly used term in the title or the abstract                                                                                                                                                                                                                                                                                                                                                                                 |  |
|                          |         | (b) Provide in the abstract an informative and balanced summary of what was done and what was found                                                                                                                                                                                                                                                                                                                                                                    |  |
| <b>Introduction</b>      |         |                                                                                                                                                                                                                                                                                                                                                                                                                                                                        |  |
| Background/rationale     | 2       | Explain the scientific background and rationale for the investigation being reported                                                                                                                                                                                                                                                                                                                                                                                   |  |
| Objectives               | 3       | State specific objectives, including any prespecified hypotheses                                                                                                                                                                                                                                                                                                                                                                                                       |  |
| <b>Methods</b>           |         |                                                                                                                                                                                                                                                                                                                                                                                                                                                                        |  |
| Study design             | 4       | Present key elements of study design early in the paper                                                                                                                                                                                                                                                                                                                                                                                                                |  |
| Setting                  | 5       | Describe the setting, locations, and relevant dates, including periods of recruitment, exposure, follow-up, and data collection                                                                                                                                                                                                                                                                                                                                        |  |
| Participants             | 6       | (a) <i>Cohort study</i> —Give the eligibility criteria, and the sources and methods of selection of participants. Describe methods of follow-up<br><i>Case-control study</i> —Give the eligibility criteria, and the sources and methods of case ascertainment and control selection. Give the rationale for the choice of cases and controls<br><i>Cross-sectional study</i> —Give the eligibility criteria, and the sources and methods of selection of participants |  |
|                          |         | (b) <i>Cohort study</i> —For matched studies, give matching criteria and number of exposed and unexposed<br><i>Case-control study</i> —For matched studies, give matching criteria and the number of controls per case                                                                                                                                                                                                                                                 |  |
| Variables                | 7       | Clearly define all outcomes, exposures, predictors, potential confounders, and effect modifiers. Give diagnostic criteria, if applicable                                                                                                                                                                                                                                                                                                                               |  |
| Data sources/measurement | 8*      | For each variable of interest, give sources of data and details of methods of assessment (measurement). Describe comparability of assessment methods if there is more than one group                                                                                                                                                                                                                                                                                   |  |
| Bias                     | 9       | Describe any efforts to address potential sources of bias                                                                                                                                                                                                                                                                                                                                                                                                              |  |
| Study size               | 10      | Explain how the study size was arrived at                                                                                                                                                                                                                                                                                                                                                                                                                              |  |
| Quantitative variables   | 11      | Explain how quantitative variables were handled in the analyses. If applicable, describe which groupings were chosen and why                                                                                                                                                                                                                                                                                                                                           |  |
| Statistical methods      | 12      | (a) Describe all statistical methods, including those used to control for confounding                                                                                                                                                                                                                                                                                                                                                                                  |  |
|                          |         | (b) Describe any methods used to examine subgroups and interactions                                                                                                                                                                                                                                                                                                                                                                                                    |  |
|                          |         | (c) Explain how missing data were addressed                                                                                                                                                                                                                                                                                                                                                                                                                            |  |
|                          |         | (d) <i>Cohort study</i> —If applicable, explain how loss to follow-up was addressed<br><i>Case-control study</i> —If applicable, explain how matching of cases and controls was addressed<br><i>Cross-sectional study</i> —If applicable, describe analytical methods taking account of sampling strategy                                                                                                                                                              |  |
|                          |         | (e) Describe any sensitivity analyses                                                                                                                                                                                                                                                                                                                                                                                                                                  |  |
| <b>Results</b>           |         |                                                                                                                                                                                                                                                                                                                                                                                                                                                                        |  |
| Participants             | 13*     | (a) Report numbers of individuals at each stage of study—eg numbers potentially eligible, examined for eligibility, confirmed eligible, included in the study, completing follow-up, and analysed                                                                                                                                                                                                                                                                      |  |
|                          |         | (b) Give reasons for non-participation at each stage                                                                                                                                                                                                                                                                                                                                                                                                                   |  |
|                          |         | (c) Consider use of a flow diagram                                                                                                                                                                                                                                                                                                                                                                                                                                     |  |
| Descriptive data         | 14*     | (a) Give characteristics of study participants (eg demographic, clinical, social) and information on exposures and potential confounders                                                                                                                                                                                                                                                                                                                               |  |
|                          |         | (b) Indicate number of participants with missing data for each variable of interest                                                                                                                                                                                                                                                                                                                                                                                    |  |
|                          |         | (c) <i>Cohort study</i> —Summarise follow-up time (eg, average and total amount)                                                                                                                                                                                                                                                                                                                                                                                       |  |
| Outcome data             | 15*     | <i>Cohort study</i> —Report numbers of outcome events or summary measures over time                                                                                                                                                                                                                                                                                                                                                                                    |  |
|                          |         | <i>Case-control study</i> —Report numbers in each exposure category, or summary measures of exposure                                                                                                                                                                                                                                                                                                                                                                   |  |
|                          |         | <i>Cross-sectional study</i> —Report numbers of outcome events or summary measures                                                                                                                                                                                                                                                                                                                                                                                     |  |
| Main results             | 16      | (a) Give unadjusted estimates and, if applicable, confounder-adjusted estimates and their precision (eg, 95%                                                                                                                                                                                                                                                                                                                                                           |  |

|                          |    |                                                                                                                                                                            |  |
|--------------------------|----|----------------------------------------------------------------------------------------------------------------------------------------------------------------------------|--|
|                          |    | confidence interval). Make clear which confounders were adjusted for and why they were included                                                                            |  |
|                          |    | (b) Report category boundaries when continuous variables were categorized                                                                                                  |  |
|                          |    | (c) If relevant, consider translating estimates of relative risk into absolute risk for a meaningful time period                                                           |  |
| Other analyses           | 17 | Report other analyses done—eg analyses of subgroups and interactions, and sensitivity analyses                                                                             |  |
| <b>Discussion</b>        |    |                                                                                                                                                                            |  |
| Key results              | 18 | Summarise key results with reference to study objectives                                                                                                                   |  |
| Limitations              | 19 | Discuss limitations of the study, taking into account sources of potential bias or imprecision. Discuss both direction and magnitude of any potential bias                 |  |
| Interpretation           | 20 | Give a cautious overall interpretation of results considering objectives, limitations, multiplicity of analyses, results from similar studies, and other relevant evidence |  |
| Generalisability         | 21 | Discuss the generalisability (external validity) of the study results                                                                                                      |  |
| <b>Other information</b> |    |                                                                                                                                                                            |  |
| Funding                  | 22 | Give the source of funding and the role of the funders for the present study and, if applicable, for the original study on which the present article is based              |  |

\*Give information separately for cases and controls in case-control studies and, if applicable, for exposed and unexposed groups in cohort and cross-sectional studies.

**Note:** An Explanation and Elaboration article discusses each checklist item and gives methodological background and published examples of transparent reporting. The STROBE checklist is best used in conjunction with this article (freely available on the Web sites of PLoS Medicine at <http://www.plosmedicine.org/>, Annals of Internal Medicine at <http://www.annals.org/>, and Epidemiology at <http://www.epidem.com/>). Information on the STROBE Initiative is available at [www.strobe-statement.org](http://www.strobe-statement.org).

1  
2  
3  
4  
5  
6  
7  
8  
9  
10  
11  
12  
13  
14  
15  
16  
17  
18  
19  
20  
21  
22  
23  
24  
25  
26  
27  
28  
29  
30  
31  
32  
33  
34  
35  
36  
37  
38  
39  
40  
41  
42  
43  
44  
45  
46  
47  
48  
49  
50  
51  
52  
53  
54  
55  
56  
57  
58  
59  
60



**Choosing a model to predict hospital admission. An observational study of new variants of predictive models for case finding.**

|                                 |                                                                                                                                                                                                                     |
|---------------------------------|---------------------------------------------------------------------------------------------------------------------------------------------------------------------------------------------------------------------|
| Journal:                        | <i>BMJ Open</i>                                                                                                                                                                                                     |
| Manuscript ID:                  | bmjopen-2013-003352.R1                                                                                                                                                                                              |
| Article Type:                   | Research                                                                                                                                                                                                            |
| Date Submitted by the Author:   | 01-Aug-2013                                                                                                                                                                                                         |
| Complete List of Authors:       | Billings, John; New York University, Georghiou, Theo; Nuffield Trust, Research Blunt, Ian; Nuffield Trust, Research Bardsley, Martin; Nuffield Trust, Research                                                      |
| <b>Primary Subject Heading</b>: | Health services research                                                                                                                                                                                            |
| Secondary Subject Heading:      | Health informatics, Health policy                                                                                                                                                                                   |
| Keywords:                       | Quality in health care < HEALTH SERVICES ADMINISTRATION & MANAGEMENT, Health economics < HEALTH SERVICES ADMINISTRATION & MANAGEMENT, Organisation of health services < HEALTH SERVICES ADMINISTRATION & MANAGEMENT |
|                                 |                                                                                                                                                                                                                     |

SCHOLARONE™  
Manuscripts

1  
2  
3 **Choosing a model to predict hospital admission. An observational study of new variants of predictive**  
4 **models for case finding.**  
5  
6  
7  
8  
9  
10  
11  
12

13 John Billings, Associate Professor (1)  
14 Theo Georghiou, Senior Research Analyst (2)  
15 Ian Blunt, Senior Research Analyst (2)  
16 Martin Bardsley, Director of Research (2)  
17  
18  
19  
20

21 <sup>1</sup> Robert F. Wagner Graduate School of Public Service, New York University, 295 Lafayette Street, Room  
22 3010, New York, NY 10012-9604, USA  
23

24 <sup>2</sup> Nuffield Trust, 59 New Cavendish Street, London W1G 7LP, UK  
25  
26

27 **Corresponding Author** [theo.georghiou@nuffieldtrust.org.uk](mailto:theo.georghiou@nuffieldtrust.org.uk)  
28  
29  
30  
31  
32  
33  
34

35 **Key words:**  
36

37 Predictive Risk, Urgent care, Hospital admission  
38  
39  
40  
41  
42

43 Word count: 4,090  
44  
45  
46  
47  
48  
49  
50  
51  
52  
53  
54  
55  
56  
57  
58  
59  
60

**ABSTRACT**

**Objectives:** To test the performance of new variants of models to identify people at risk of an emergency hospital admission. We compared (1) the impact of using alternative data sources (hospital inpatient, A&E, outpatient, and GP electronic medical records) (2) the effects of local calibration on the performance of the models and (3) the choice of population denominators.

**Design:** Multivariate logistic regressions using person level data adding each data set sequentially to test value of additional variables and denominators.

**Setting:** Five Primary Care Trusts within England.

**Participants:** 1,836,099 people aged 18-95 registered with GPs on 31 July 2009.

**Main outcome measures:** Models to predict hospital admission and readmission were compared in terms of positive predictive value and sensitivity for various risk strata and with receiver operating curve C statistic.

**Results:** The addition of each data set showed moderate improvement in number of patients identified with little or no loss of positive predictive value. However, even with inclusion of GP electronic medical record information, the algorithms identified only a small number of patients with no emergency hospital admissions in the prior two years. The model pooled across all sites performed almost as well as models calibrated to local data from just one site. Using population denominators from GP registers led to better case finding.

**Conclusions:** These models provide a basis for wider application in the NHS. Each of the models examined produce reasonably robust performance and offers some predictive value. The addition of more complex data add some value, but we were unable to conclude that pooled models performed less well than those in individual sites. Choices about model should be linked to the intervention design. Characteristics of patients identified by the algorithms provide useful information in the design/costing of intervention strategies to improve care coordination/outcomes for these patients.

### Article focus

- The use of statistical models to predict risk of hospital admissions are increasingly used to prioritise patients for preventive care. Models exist in several different forms and use a variety of input data sets.
- This paper compared the performance of a variety of models built using different datasets.

### Key messages

- The addition of more detailed data sets led to moderate improvement in number of patients identified with little or no loss of positive predictive value.
- The use of GP registry data for the denominator proved to be of significant importance. By including all patients in an area, not just those with prior hospital use, improved rates of case finding were observed.
- Models calibrated to local data sets did not show a consistent improvement over models built on pooled data.

### Strengths and limitations of this study

- The analysis is based on populations from only five areas in England, however this is the largest UK population (1.8M people) used in the development of a publicly available risk tool.
- The success of a predictive model depends on many factors beyond the statistical performance of the model.

## INTRODUCTION

There remains continuing interest in identifying patients at risk of future hospital admissions. Policies providing penalties[1] or non-payment[2] for hospital readmissions that put providers at risk for a share of total health expenditures have been developed for in the U.S. and in England. These create even stronger incentives to identify high risk patients to target care coordination and management strategies that may potentially reduce future inpatient expenditures.

Most predictive modelling approaches have used administrative data from claims in the U.S. or hospital data from Hospital Episode Statistics (HES) or Secondary Uses Services (SUS) in England. These data provide the information on prior utilisation and diagnostic history to develop predictive models for patients at risk of future hospitalization.[3] Payor claims data in the U.S. provide rich information on care provided in hospitals, home care services and nursing home use, as well as detailed pharmacy prescription history.[4] In England, the most commonly used models (such as in the now outdated Patient at Risk of Readmission PARR algorithm)[5,6] are based on hospital admissions data (including day case use, and regular attendances) with some use of accident and emergency (A&E) and outpatient attendance data as well.[7]

While some predictive modeling efforts in the U.K. have included information from GP electronic medical records (EMRs),[8,9] using such data presents a number of challenges. These include obtaining permissions for access to EMRs for large populations, linking the records to hospital data, and use of Read codes[10] to develop GP variables. Data from EMRs include additional elements not available in the hospital data sets such as test results (e.g. blood pressure, HbA1c levels), diagnostic history for patients without recent inpatient admissions, prescription history, GP contact patterns (GP visits and telephone contacts), and other personal health markers (e.g. body mass index, smoking status). These additional data elements have the potential to add power to predictive modeling efforts, especially for patients with no or lower levels of recent inpatient use.

Despite the challenges, a number of initiatives around the UK are demonstrating population wide access to EMR data. A common application is in the use of models that assist local clinical commissioning groups (CCGs) in identifying high risk patients.



1  
2  
3  
4  
5  
6  
7  
8  
9  
10  
11  
12  
13  
14  
15  
16  
17  
18  
19  
20  
21  
22  
23  
24  
25  
26  
27  
28  
29  
30  
31  
32  
33  
34  
35  
36  
37  
38  
39  
40  
41  
42  
43  
44  
45  
46  
47  
48  
49  
50  
51  
52  
53  
54  
55  
56  
57  
58  
59  
60

Though the choice of data sets for a predictive model makes a big difference to the investment required to run these models – at least initially – no studies have looked at the marginal value of different data sets. In this analysis we examine the added value of including data on A&E and outpatient visits (which are readily available) to predictive modeling efforts using hospital inpatient data alone. We also assess the marginal effect of adding GP EMR information to help identify patients at risk of future hospital admissions. Most existing models in use were developed using logistic regression techniques and we used this standard approach throughout this paper. We recognize that different modelling methods may yield different results but in this analysis we were concerned with the impact of changes in the underlying data sets. Such models will always be limited by the scope and quality of data available, the ways data are grouped and classified and the ways that users can assess up to date information. Despite these problems these models have become commonly used tools. In addition to the depth of data used there is also a question about how generalisable models are across different sites. In many settings models are recalibrated on local data sets. Yet there is little systematic analysis of the value that this step adds and whether models built on data from one site outperform those built on a larger sample of pooled data. We therefore explore whether there is a need for development of individual site predictive models, or whether models developed from multiple sites can be applied effectively at a new individual site.

## METHODS

We conducted analyses separately for five Primary Care Trust areas in England (Newham, Cornwall, Kent, Croydon, Redbridge; total adult population ranging from 209,661 to 693,089). Results are reported for the individual sites and as combined/pooled results (total population 1,836,099). Hospital data was extracted from the Secondary Users Services (SUS)[11] system which contained records of all hospital events (inpatient admissions, outpatient appointments and A&E visits) for the PCTs' registered populations between 1 August 2007 and 30 September 2010. The PCTs also extracted data from GP systems in two forms. Firstly as a register of the local adult population from 1 August 2007 and 31 July 2009, and secondly in the form of datasets recording details of GP consultations over the same time period.

Personally identifiable information was stripped out before any data were passed to the research team. Individuals' NHS numbers (the personal identifiers) were concatenated with a passcode chosen by each of the five PCT areas (and unknown to the research team) and these were pseudonymised at source using secure hash algorithm SHA-256 [12]. This allowed for linkage between the hospital and the general practice data from each area, whilst preserving individuals' anonymity.

A series of variables were created from each data set that were believed to be potentially predictive of an unplanned (emergency) hospital admission in the last 12 months of the study period. These variables captured resource use, utilization patterns, diagnostic history, test results, and prescription history in the two years prior to the predictive period. They were created for all individuals aged 18+ registered with a GP in one of the five areas on 31 July 2009. To account for expected time required to obtain and process the hospital and GP EMR data, we included a two-month lag in our analyses, with data from 1 August 2007 to 31 July 2009 used to predict emergency admissions during the period 1 October 2009 to 30 September 2010.

Patient age and gender were obtained from the GP register. Patient area of residence was not available, and so GP practice attributed index of multiple deprivation (2007) was used as an area deprivation measure. The number of months the patient was registered with the PCT in the pre-period was calculated and included in the regression. Hospital inpatient data were used to capture utilization in the 0-90, 91-181, 180-365, and 366-730 days prior to the lag period. The number of emergency and elective admissions for these periods were included and dichotomous variables for any day case or regular attendance use were created.

1  
2  
3 A broad range of diagnostic variables were developed using primary and secondary diagnosis fields and  
4 a Charlson Comorbidity Index[13] was calculated for each patient and included in the model.  
5  
6

7  
8 A&E data were used to determine A&E visit rates for various intervals in the pre-period, both total visits  
9 and unplanned follow-up visits. A&E diagnostic information was not reliably reported across the five  
10 sites and was not included, although X-ray use was included. Outpatient data provided variables on  
11 outpatient visit rates for various intervals, as well as missed appointment rates and the number of  
12 different specialty types consulted. Diagnostic information in outpatient data was missing in more than  
13 95% of cases and was not included.  
14  
15  
16  
17

18  
19 GP EMR data were used to create proxy visit rates (these may include both actual GP visits, in addition  
20 to other events documented in a person's records) for various intervals and to capture any increase in  
21 visit rates at the end of the pre-period that may reflect increased morbidity in a patient. EMR Read  
22 codes (CTV3 version) were used to obtain test results (blood pressure, blood serum levels, HbA1c levels,  
23 etc.), body mass index, smoking history, prescription history (number and type), and a range of  
24 diagnostic variables during the pre-period.  
25  
26  
27  
28

29  
30 Variables from each data set (inpatient (including day case and regular attenders), A&E, outpatient, and  
31 GP EMRs) were added and modeled sequentially using standard logistic regression in SPSS v20.  
32

33  
34 Emergency admission in the next 12 months was used as the dependent variable, producing a risk score  
35 ranging from 0-100. Separate models were developed for each PCT area, and analysis was limited to  
36 patients aged 18-95 who were on the GP register in the area. Over-fitting was tested using a split  
37 sample approach, with only minor differences observed in positive predictive values (PPV), sensitivity,  
38 and specificity.  
39  
40  
41  
42

43  
44 Findings provided here include both individual site results and results combined across the five sites.

45 We also created five additional predictive models (referred to below as the 'four-site regression  
46 models'), each one combining data from four sites and applying coefficients to the fifth remaining site.  
47 With this we could compare results with individual site predictive models to help assess the value of  
48 local model development.  
49  
50  
51  
52

53  
54 The full list of more than 300 potential variables was ultimately reduced to 88 by exclusion of variables  
55 with low volumes and low significance levels across the sites. The 88 variables ultimately included in the  
56 model (and regression coefficients), may be found in Appendix B and D, and a full listing of the variables  
57  
58  
59  
60

1  
2  
3 considered for inclusion and detailed specification of each variable are available at  
4 <http://www.nuffieldtrust.org.uk/>.  
5  
6

7  
8 Cost variables were examined, with secondary care activity costed according to the method used in  
9 development of the person based formula for allocating commissioning funds to general practices in  
10 England.[14] Ultimately, these were not included in the predictive models because of concerns about  
11 difficulties in constructing these variables by possible future users, however costs are included in  
12 descriptive findings to help in design of intervention strategies.  
13  
14  
15

16  
17 Predictive modeling performance is typically documented reporting PPV and sensitivity at the risk score  
18 threshold of 50. However, because interventions may be targeted at patients with higher or lower risk  
19 scores and interventions strategies may be calibrated differently depending on risk level and  
20 characteristics of patients at various risk score levels, we report PPV sensitivity at 20 risk score cutoff  
21 points (vigintiles) and provide detailed patient characteristics at risk score thresholds of 50 and 30 to  
22 facilitate intervention design.  
23  
24  
25  
26  
27

## 28 29 **RESULTS**

### 30 31 **Pooled Individual Site Results**

32  
33 There were 1,836,099 people aged 18 and over who were registered with a GP practice on 31 July 2009.  
34 Table 1 shows the combined results of individual site regressions including the number of patients  
35 correctly identified, PPV, and sensitivity for four models:  
36  
37

- 38 (i) IP based on hospital inpatient data only (including day cases and regular attendances)
- 39 (ii) IPAE using inpatient and A&E data
- 40 (iii) IPAEOP using inpatient A&E and outpatient data
- 41 (iv) IPAEOPGP using inpatient, A&E, outpatient data and GP EMR.  
42  
43  
44

45 At the traditional risk score threshold level of 50 all four models perform respectably in terms of PPV  
46 (ranging from .523 to .538), but sensitivity remains quite low across all models (.049 to .060). Lowering  
47 the threshold to 30 increases sensitivity somewhat with a concomitant reduction in PPV (ranging from  
48 .417 to .422). The ROC area under the curve (C statistic) improved with the addition of each data set,  
49 increasing from .731 with the inpatient-only model to .780 with the full model.  
50  
51  
52  
53  
54  
55  
56  
57  
58  
59  
60

1  
2  
3  
4  
5  
6  
7  
8  
9  
10  
11  
12  
13  
14  
15  
16  
17  
18  
19  
20  
21  
22  
23  
24  
25  
26  
27  
28  
29  
30  
31  
32  
33  
34  
35  
36  
37  
38  
39  
40  
41  
42  
43  
44  
45  
46  
47  
48  
49

**Table 1** Model performance, four models: IP, IPAE, IPAEOP, IPAEOPGP. Five site individual runs combined.

| Risk Score Threshold   | IP Data       |       |             | IP+AE Data    |       |             | IP+AE+OP Data |       |             | IP+AE+OP+GP Data |       |             |
|------------------------|---------------|-------|-------------|---------------|-------|-------------|---------------|-------|-------------|------------------|-------|-------------|
|                        | True Positive | PPV   | Sensitivity | True Positive | PPV   | Sensitivity | True Positive | PPV   | Sensitivity | True Positive    | PPV   | Sensitivity |
| 1                      | 94,692        | 0.052 | 1.000       | 94,692        | 0.052 | 1.000       | 94,692        | 0.052 | 1.000       | 94,692           | 0.052 | 1.000       |
| 5                      | 54,450        | 0.126 | 0.575       | 56,117        | 0.128 | 0.593       | 56,438        | 0.131 | 0.596       | 61,498           | 0.133 | 0.649       |
| 10                     | 33,053        | 0.219 | 0.349       | 34,102        | 0.221 | 0.360       | 35,033        | 0.223 | 0.370       | 39,986           | 0.220 | 0.422       |
| 15                     | 22,898        | 0.285 | 0.242       | 23,166        | 0.293 | 0.245       | 24,261        | 0.290 | 0.256       | 28,697           | 0.283 | 0.303       |
| 20                     | 16,181        | 0.346 | 0.171       | 16,915        | 0.347 | 0.179       | 17,719        | 0.344 | 0.187       | 21,601           | 0.333 | 0.228       |
| 25                     | 12,670        | 0.385 | 0.134       | 13,182        | 0.386 | 0.139       | 13,754        | 0.383 | 0.145       | 16,672           | 0.378 | 0.176       |
| 30                     | 10,061        | 0.421 | 0.106       | 10,555        | 0.422 | 0.111       | 11,010        | 0.419 | 0.116       | 13,196           | 0.417 | 0.139       |
| 35                     | 8,130         | 0.449 | 0.086       | 8,600         | 0.450 | 0.091       | 8,986         | 0.448 | 0.095       | 10,516           | 0.450 | 0.111       |
| 40                     | 6,700         | 0.477 | 0.071       | 7,139         | 0.478 | 0.075       | 7,421         | 0.476 | 0.078       | 8,494            | 0.479 | 0.090       |
| 45                     | 5,535         | 0.501 | 0.058       | 5,976         | 0.504 | 0.063       | 6,167         | 0.499 | 0.065       | 6,921            | 0.510 | 0.073       |
| 50                     | 4,627         | 0.529 | 0.049       | 5,027         | 0.531 | 0.053       | 5,172         | 0.523 | 0.055       | 5,669            | 0.538 | 0.060       |
| 55                     | 3,862         | 0.551 | 0.041       | 4,222         | 0.551 | 0.045       | 4,359         | 0.543 | 0.046       | 4,581            | 0.562 | 0.048       |
| 60                     | 3,239         | 0.574 | 0.034       | 3,555         | 0.569 | 0.038       | 3,658         | 0.567 | 0.039       | 3,735            | 0.587 | 0.039       |
| 65                     | 2,711         | 0.593 | 0.029       | 3,012         | 0.590 | 0.032       | 3,041         | 0.587 | 0.032       | 3,034            | 0.618 | 0.032       |
| 70                     | 2,245         | 0.617 | 0.024       | 2,481         | 0.612 | 0.026       | 2,519         | 0.610 | 0.027       | 2,453            | 0.645 | 0.026       |
| 75                     | 1,816         | 0.634 | 0.019       | 2,049         | 0.639 | 0.022       | 2,064         | 0.631 | 0.022       | 1,921            | 0.666 | 0.020       |
| 80                     | 1,418         | 0.666 | 0.015       | 1,662         | 0.656 | 0.018       | 1,646         | 0.654 | 0.017       | 1,478            | 0.696 | 0.016       |
| 85                     | 1,064         | 0.679 | 0.011       | 1,293         | 0.674 | 0.014       | 1,276         | 0.679 | 0.013       | 1,114            | 0.711 | 0.012       |
| 90                     | 769           | 0.710 | 0.008       | 932           | 0.688 | 0.010       | 935           | 0.702 | 0.010       | 754              | 0.738 | 0.008       |
| 95                     | 478           | 0.748 | 0.005       | 592           | 0.725 | 0.006       | 586           | 0.728 | 0.006       | 437              | 0.771 | 0.005       |
| Top 1%                 | 8,214         | 0.447 | 0.087       | 8,353         | 0.455 | 0.088       | 8,410         | 0.458 | 0.089       | 8,722            | 0.475 | 0.092       |
| Top 5%                 | 24,873        | 0.271 | 0.263       | 25,355        | 0.276 | 0.268       | 25,712        | 0.280 | 0.272       | 26,991           | 0.294 | 0.285       |
| <b>ROC C Statistic</b> |               | 0.731 |             | 0.745         |       | 0.752       |               | 0.780 |             |                  |       |             |

1  
2  
3 Of particular note is the finding that the addition of each data set added power, that is, correctly  
4 identified more patients with an admission in the next 12 months, with only a minor reduction in PPV.  
5 At a risk threshold of 50, the addition of A&E data resulted in increase of 400 (8.6%) correctly flagged  
6 patients, with no loss in PPV. The inclusion of outpatient data added a more modest 2.9%, but with a  
7 slight loss in PPV (.531 to .523). The addition of GP EMR data added an additional 9.6% of patients,  
8 while actually increasing the accuracy of the model (PPV increasing from .523 to .538). The added  
9 power of the A&E data set is less substantial at a risk score threshold of 30 (4.9%), but outpatient and  
10 GP EMR data sets had larger increases in correctly identified patients (4.3% and 19.9%).  
11  
12

13  
14  
15  
16  
17  
18 There were also important differences between the models in terms of the characteristics of patients  
19 identified as high risk. For example, at a risk score cutoff of 50, patients identified using inpatient data  
20 alone had high prior emergency inpatient utilization rates with 2.62 admissions in the prior year  
21 compared to 2.43 when A&E data was added; 2.34 with addition of outpatient, and 2.20 with the  
22 addition of GP EMR data - see Table 2.  
23  
24  
25  
26  
27

28 The inclusion of the additional data sets also led to a reduction in observed morbidity level of patients at  
29 the 50 threshold, with lower numbers of long term conditions, fewer patients with multiple long term  
30 conditions, lower Charlson Comorbidity Index scores, less history of alcohol abuse and mental illness,  
31 and lower emergency inpatient costs in the years prior to the predictive period. Similar, but less  
32 substantial differences were observed at the risk score threshold of 30. The addition of the A&E data set  
33 resulted in higher rates of A&E visits in the pre-period among patients identified at both risk score cutoff  
34 levels, and the addition of outpatient data resulted in higher outpatient visit and missed visit rates  
35 among identified patients.  
36  
37  
38  
39  
40  
41  
42

43 These findings suggest inclusion of the additional data sets added some predictive power and generally  
44 tended to find additional patients who were less severely ill (more severely ill patients tended to remain  
45 high risk). Thus they potentially offer an opportunity for intervention at earlier stages in the progression  
46 of a patient's condition. However, the number of patients identified with no prior emergency inpatient  
47 utilization in the prior two years was relatively small across all models. At a risk score threshold of 50,  
48 only 0.3% of patients correctly identified by the inpatient-only model had no prior emergency  
49 admissions in the previous two years, and increasing only modestly 3.2% in the full model (Table 3). At a  
50 risk threshold of 30, the rates were higher, but only reaching 12.4% for the full model.  
51  
52  
53  
54  
55  
56  
57  
58  
59  
60

**Table 2** Patient characteristics by risk score threshold four models: IP, IPAE, IPAEOP, IPAEOPGP. Five site individual runs combined.

|                               | Risk Score 50+ |              |                |                  | Risk Score 30+ |              |                |                  |
|-------------------------------|----------------|--------------|----------------|------------------|----------------|--------------|----------------|------------------|
|                               | IP<br>Data     | IPAE<br>Data | IPAEOP<br>Data | IPAEOPGP<br>Data | IP<br>Data     | IPAE<br>Data | IPAEOP<br>Data | IPAEOPGP<br>Data |
| Number of patients            | 8,743          | 9,473        | 9,892          | 10,545           | 23,912         | 25,021       | 26,304         | 31,653           |
| Patients with adm next 12 mos | 4,627          | 5,027        | 5,172          | 5,669            | 10,062         | 10,554       | 11,011         | 13,196           |
| Mean Age                      | 73.9           | 72.3         | 71.2           | 72.2             | 75.3           | 74.0         | 73.4           | 73.9             |
| Age 18-39                     | 6.2%           | 8.4%         | 8.7%           | 7.8%             | 5.1%           | 6.8%         | 7.0%           | 6.4%             |
| Age 40-54                     | 8.7%           | 9.6%         | 10.9%          | 10.6%            | 7.0%           | 7.8%         | 8.6%           | 8.5%             |
| Age 55-64                     | 6.9%           | 7.4%         | 7.8%           | 8.1%             | 6.4%           | 6.4%         | 7.0%           | 7.3%             |
| Age 65-74                     | 14.4%          | 13.9%        | 15.0%          | 13.5%            | 13.9%          | 13.8%        | 14.4%          | 13.7%            |
| Age 75-84                     | 30.5%          | 28.9%        | 28.2%          | 27.4%            | 32.1%          | 31.1%        | 30.3%          | 29.6%            |
| Age 85+                       | 33.3%          | 31.8%        | 29.3%          | 32.6%            | 35.5%          | 34.1%        | 32.7%          | 34.4%            |
| Female                        | 55.2%          | 55.2%        | 54.9%          | 54.7%            | 56.9%          | 57.1%        | 56.6%          | 56.5%            |
| Practice IMD                  | 24.6           | 24.9         | 24.8           | 24.3             | 24.2           | 24.3         | 24.3           | 23.8             |
| Ischaemic Heart Disease       | 36.2%          | 34.2%        | 33.2%          | 32.1%            | 29.8%          | 28.4%        | 27.8%          | 25.2%            |
| Angina                        | 21.7%          | 20.5%        | 19.5%          | 19.3%            | 17.3%          | 16.4%        | 15.7%          | 14.5%            |
| Hypertension                  | 64.5%          | 61.2%        | 59.9%          | 59.0%            | 59.4%          | 56.7%        | 55.1%          | 50.9%            |
| CHF                           | 19.2%          | 17.8%        | 16.9%          | 15.9%            | 14.0%          | 13.2%        | 12.5%          | 10.7%            |
| CVD                           | 21.7%          | 20.1%        | 19.3%          | 18.1%            | 16.9%          | 15.8%        | 15.2%          | 13.3%            |
| COPD                          | 23.4%          | 21.4%        | 20.6%          | 19.1%            | 17.2%          | 16.3%        | 15.7%          | 13.4%            |
| Asthma                        | 21.3%          | 20.9%        | 20.1%          | 18.1%            | 17.4%          | 16.6%        | 16.1%          | 13.8%            |
| Diabetes                      | 34.1%          | 32.4%        | 31.6%          | 28.8%            | 30.1%          | 28.8%        | 27.6%          | 23.6%            |
| Renal Failure                 | 16.5%          | 14.6%        | 14.2%          | 13.3%            | 11.2%          | 10.4%        | 10.0%          | 8.5%             |
| Any long term conditions      | 89.8%          | 87.0%        | 85.8%          | 85.0%            | 86.6%          | 83.6%        | 81.4%          | 75.2%            |
| Any cancer                    | 15.4%          | 13.8%        | 13.4%          | 12.4%            | 13.3%          | 12.7%        | 12.2%          | 10.5%            |
| Alcohol misuse                | 10.0%          | 10.0%        | 9.6%           | 9.1%             | 7.0%           | 6.7%         | 6.4%           | 5.8%             |
| Mental illness                | 32.0%          | 30.6%        | 28.9%          | 27.2%            | 23.5%          | 22.3%        | 21.3%          | 18.6%            |
| Number long term conditions   | 2.67           | 2.51         | 2.43           | 2.31             | 2.20           | 2.10         | 2.02           | 1.79             |
| Charlson Index                | 3.96           | 3.69         | 3.55           | 3.28             | 3.09           | 2.95         | 2.82           | 2.43             |
| Emerg adms 1yr prior          | 2.62           | 2.43         | 2.34           | 2.20             | 1.64           | 1.57         | 1.50           | 1.29             |
| Emerg adms 2 yr prior         | 1.78           | 1.67         | 1.61           | 1.50             | 1.15           | 1.10         | 1.05           | 0.91             |
| No emerg adm prior 2 yrs      | 0.6%           | 1.9%         | 3.3%           | 4.3%             | 4.2%           | 6.5%         | 9.2%           | 16.2%            |
| Elect adms 1yr prior          | 0.32           | 0.29         | 0.31           | 0.28             | 0.27           | 0.26         | 0.27           | 0.24             |
| Elect adms 2 yr prior         | 0.24           | 0.23         | 0.26           | 0.24             | 0.20           | 0.20         | 0.22           | 0.19             |
| Any day case 1yr prior        | 31.9%          | 30.8%        | 31.6%          | 28.7%            | 31.5%          | 30.7%        | 30.4%          | 26.9%            |
| Any day case 2yr prior        | 28.9%          | 27.6%        | 28.0%          | 25.7%            | 27.8%          | 26.9%        | 26.7%          | 23.7%            |
| Emerg adm cost 1yr prior      | £4,500         | £4,073       | £3,920         | £3,688           | £2,893         | £2,709       | £2,604         | £2,231           |
| Emerg adm cost 2yr prior      | £2,932         | £2,675       | £2,583         | £2,422           | £1,962         | £1,822       | £1,757         | £1,521           |
| AE visits 1yr prior           | 2.90           | 3.59         | 3.45           | 3.17             | 1.83           | 2.26         | 2.17           | 1.86             |
| AE visits 2yr prior           | 1.90           | 2.40         | 2.31           | 2.10             | 1.23           | 1.52         | 1.46           | 1.25             |
| OP visits 1yr prior           | 7.27           | 6.94         | 9.65           | 8.23             | 5.65           | 5.63         | 7.39           | 6.16             |
| OP visits 2yr prior           | 4.30           | 4.10         | 5.92           | 5.08             | 3.39           | 3.38         | 4.54           | 3.81             |
| OP visits missed 1yr prior    | 0.47           | 0.48         | 0.74           | 0.65             | 0.35           | 0.36         | 0.53           | 0.44             |
| OP visits missed 2yr prior    | 0.49           | 0.48         | 0.71           | 0.61             | 0.33           | 0.34         | 0.48           | 0.40             |
| GP visits 1yr prior           | 42.9           | 42.7         | 43.3           | 52.5             | 38.5           | 38.4         | 38.8           | 45.4             |
| GP visits 2yr prior           | 35.5           | 35.2         | 35.7           | 42.5             | 32.4           | 32.1         | 32.5           | 37.7             |
| Any high risk BNFs            | 73.9%          | 71.6%        | 72.2%          | 84.0%            | 69.3%          | 67.5%        | 68.1%          | 79.8%            |
| Num high risk BNFs            | 1.94           | 1.85         | 1.88           | 2.20             | 1.64           | 1.59         | 1.61           | 1.84             |
| High blood pressure           | 9.0%           | 9.0%         | 9.0%           | 9.0%             | 10.0%          | 10.0%        | 10.0%          | 9.0%             |
| Smoker                        | 18.0%          | 19.0%        | 19.0%          | 23.0%            | 16.0%          | 16.0%        | 16.0%          | 20.0%            |
| BMI 30+                       | 16.0%          | 17.0%        | 17.0%          | 17.0%            | 15.0%          | 16.0%        | 16.0%          | 18.0%            |
| HbA1c > 10                    | 5.0%           | 5.0%         | 5.0%           | 7.0%             | 5.0%           | 5.0%         | 4.0%           | 6.0%             |
| Any Em adm next 12 mos        | 52.9%          | 53.1%        | 52.3%          | 53.8%            | 42.1%          | 42.2%        | 41.9%          | 41.7%            |
| Num Em adm next 12 mos        | 1.34           | 1.33         | 1.29           | 1.31             | 0.89           | 0.89         | 0.87           | 0.84             |
| 0 Em adm next 12 mos          | 47.1%          | 46.9%        | 47.7%          | 46.2%            | 57.9%          | 57.8%        | 58.1%          | 58.3%            |
| 1 Em adm next 12 mos          | 23.0%          | 23.0%        | 23.2%          | 23.9%            | 21.7%          | 21.9%        | 21.7%          | 22.3%            |
| 2 Em adm next 12 mos          | 12.5%          | 12.5%        | 12.3%          | 13.2%            | 10.0%          | 10.0%        | 10.0%          | 9.9%             |
| 3 Em adm next 12 mos          | 7.3%           | 7.3%         | 7.0%           | 7.1%             | 4.8%           | 4.9%         | 4.8%           | 4.6%             |
| 4+ Em adm next 12 mos         | 10.2%          | 10.2%        | 9.8%           | 9.7%             | 5.5%           | 5.5%         | 5.3%           | 4.9%             |
| Emerg adm cost next 12 mos    | £2,358         | £2,266       | £2,199         | £2,270           | £1,608         | £1,575       | £1,546         | £1,507           |

1  
2  
3  
4  
5  
6  
7  
8  
9  
10  
11  
12  
13  
14  
15  
16  
17  
18  
19  
20  
21  
22  
23  
24  
25  
26  
27  
28  
29  
30  
31  
32  
33  
34  
35  
36  
37  
38  
39  
40  
41  
42  
43  
44  
45  
46  
47  
48  
49  
50  
51  
52  
53  
54  
55  
56  
57  
58  
59  
60

|                       |      |      |      |      |      |      |      |      |
|-----------------------|------|------|------|------|------|------|------|------|
| AE visits next 12 mos | 1.88 | 2.11 | 2.04 | 2.04 | 1.24 | 1.37 | 1.36 | 1.29 |
|-----------------------|------|------|------|------|------|------|------|------|

**Table 3** Proportion of patients correctly identified, who had no emergency admissions in the prior two years. Four models: IP, IPAE, IPAEOP, IPAEOPGP. Five site individual runs combined.

| Prediction threshold | IP Data | IPAE Data | IPAEOP Data | IPAEOPGP Data |
|----------------------|---------|-----------|-------------|---------------|
| Risk Score 50+       | 0.3%    | 1.2%      | 2.3%        | 3.2%          |
| Risk Score 30+       | 2.7%    | 4.4%      | 6.3%        | 12.4%         |
| Top 1%               | 1.5%    | 2.9%      | 4.2%        | 6.5%          |
| Top 5%               | 25.9%   | 26.4%     | 26.7%       | 30.8%         |

### Individual Site and 'Four-Site Regression' Model Results

Overall the performance of the models was similar at the individual site level. Only modest differences were found in PPV levels and sensitivity across the sites. For runs using non-GP data only (IPAEOP), at the risk score threshold of 50, PPVs ranged from .512 to .552 and sensitivity ranged from .047 to .071. For the model including GP EMRs, PPVs ranged from .521 to .566 and sensitivity from .053 to .073. See Appendix A. There was some variation in the magnitude of regression coefficients between sites, but in general the coefficients were comparable for models based on the non-GP data model (IPAEOP). See Appendix B. For the model including variables from GP EMRs (IPAEOPGP), the level of variation in regression coefficients (size and direction) was somewhat greater for those variables derived from GP data. We observed substantial differences in frequency of reporting of Read codes across sites which no doubt contributed to this variation. The level of significance of individual variables also varied across sites (Appendix C), but most variables were consistently strongly significant across all sites, especially variables involving prior emergency inpatient admissions. Again, higher levels of variation in levels of significance were observed for the GP variables derived from Read codes.

We compared the results for these individual site models to a pooled model combining data from four of the sites and applied coefficients to the remaining individual site. We found generally only small differences in predictive accuracy (PPV) between these two approaches (Table 4), however the individual site models identified a greater number of true positives. For example, in Cornwall at a risk



score cutoff of 50, the individual site model using hospital data identified correctly 1,041 patients while the pooled model identified only 754. In Newham however, the four-site model was more powerful, correctly identifying 858 patients compared to 734 for the individual site approach. In both cases (and in general across all sites), the model identifying larger numbers of true positives had a somewhat lower PPV, suggesting improved case finding volume came at the expense of predictive accuracy.

**Table 4** Individual site and four-site regression models. Case finding and predictive accuracy.

|                  | IPOP AE                    |       |                      |       | IPOP AEGP                  |       |                      |       |
|------------------|----------------------------|-------|----------------------|-------|----------------------------|-------|----------------------|-------|
|                  | Individual Site Regression |       | Four Site Regression |       | Individual Site Regression |       | Four Site Regression |       |
|                  | True Positives             | PPV   | True Positives       | PPV   | True Positives             | PPV   | True Positives       | PPV   |
| <b>Newham</b>    |                            |       |                      |       |                            |       |                      |       |
| Risk Score 50+   | 734                        | 0.552 | 858                  | 0.517 | 768                        | 0.566 | 835                  | 0.523 |
| Risk Score 30+   | 1,409                      | 0.450 | 1,564                | 0.414 | 1,570                      | 0.439 | 1,798                | 0.409 |
| <b>Cornwall</b>  |                            |       |                      |       |                            |       |                      |       |
| Risk Score 50+   | 1,041                      | 0.520 | 754                  | 0.548 | 1,176                      | 0.545 | 952                  | 0.556 |
| Risk Score 30+   | 2,439                      | 0.406 | 1,970                | 0.426 | 3,032                      | 0.410 | 2,746                | 0.411 |
| <b>Kent</b>      |                            |       |                      |       |                            |       |                      |       |
| Risk Score 50+   | 1,565                      | 0.513 | 1,387                | 0.519 | 1,736                      | 0.521 | 1,873                | 0.493 |
| Risk Score 30+   | 3,372                      | 0.401 | 3,067                | 0.403 | 4,079                      | 0.397 | 4,432                | 0.369 |
| <b>Croydon</b>   |                            |       |                      |       |                            |       |                      |       |
| Risk Score 50+   | 1,089                      | 0.528 | 1,192                | 0.523 | 1,182                      | 0.550 | 1,230                | 0.537 |
| Risk Score 30+   | 2,134                      | 0.444 | 2,258                | 0.424 | 2,610                      | 0.442 | 2,502                | 0.437 |
| <b>Redbridge</b> |                            |       |                      |       |                            |       |                      |       |
| Risk Score 50+   | 743                        | 0.512 | 863                  | 0.495 | 807                        | 0.522 | 607                  | 0.519 |
| Risk Score 30+   | 1,656                      | 0.420 | 1,693                | 0.415 | 1,905                      | 0.423 | 1,390                | 0.436 |

### Testing alternative population denominators

Models built using inpatient data only (IP) were also built for just the subset of patients who had some inpatient care in the prior two years (to reflect typical predictive modeling efforts that may have been conducted without access to GP registry information), as well as for the group who had had an emergency admission in the prior year (to replicate analyses conducted by PARR users).

1  
2  
3  
4  
5  
6  
7  
8  
9  
10  
11  
12  
13  
14  
15  
16  
17  
18  
19  
20  
21  
22  
23  
24  
25  
26  
27  
28  
29  
30  
31  
32  
33  
34  
35  
36  
37  
38  
39  
40  
41  
42  
43  
44  
45  
46  
47  
48  
49  
50  
51  
52  
53  
54  
55  
56  
57  
58  
59  
60

Combining the results from the five sites at a risk score threshold of 50, models using the full GP register correctly identified 4,627 patients compared with 3,572 patients in runs restricted to patients with prior inpatient care and 3,060 to runs limited to patients with an emergency admission in the prior year. This substantial increase in case finding was obtained with only moderate loss in PPV (.529 GP list, .559 prior inpatient and .589 emergency admissions in last year). Similar results were also found for all hospital data models (IPOPAE, though with any hospital use in prior two years, rather than just any inpatient use).

Using the full GP registry population did not result in finding substantial numbers of patients with no emergency admissions in the prior two years, but the increased numbers of patients identified included more patients with less prior use and lower levels of morbidity. For a profile of patients identified using these alternative denominators see <http://www.nuffieldtrust.org.uk/>.

## DISCUSSION

This analysis has looked at the performance of new variants of predictive models for case finding. These models are intended to update and improve upon the established combined predictive model-like [15] and PARR models [5] widely used in the NHS.

Each of the models examined produced reasonably robust performance, by some measures better or at least comparable to similar prior models [9]. At a risk threshold of 50, patients identified by the models had PPVs ranging from .523 to .538. While the percent of all patients with future admissions identified was relatively low (sensitivity .049 to .060), lowering the risk threshold allows the identification of more patients with relatively small loss in PPV (e.g. at a risk threshold of 30, the full model identified 14% of future admissions with a PPV of .417). Users of predictive modeling algorithms have obvious trade-offs between maximizing the number of patients identified and predictive accuracy. Lower risk score thresholds will find more patients, but these patients are increasingly less likely to have future admissions.

The implications for intervention design are important. Patients at lower risk thresholds have less prior inpatient use and lower morbidity, so an intervention here might be calibrated to be less intensive. But because the models are less accurate at lower risk scores, the amount that can be spent on an intervention is also reduced if you wish to achieve financial break-even (ie where the cost of intervention is off-set by cost savings from reduction in future admissions). As documented in Table 2,

1  
2  
3 at a risk score threshold of 50, the rate of future admission for patients identified by the full model  
4 (IPAEOPGP data) was 1.31 admissions per year with an associated cost of £2,270. If there were a 10%  
5 reduction in future admissions, £227 could be spent on an intervention to improve care coordination  
6 and still achieve break-even. However, at a lower risk threshold of 30, the lower rates of future  
7 admissions and costs means that lower intervention expenditures are required to achieve break-even  
8 (£151 with a 10% reduction in future admissions). A detailed business case analysis with mean  
9 emergency inpatient costs in the next 12 months within each risk vigintile level is available via  
10 <http://www.nuffieldtrust.org.uk/>.  
11  
12  
13  
14  
15  
16  
17

18 These data also provide other information that may be useful in the development of intervention  
19 strategies. As shown in Table 2, patients identified by the models have extremely high rates of chronic  
20 disease (85-90% with long term conditions at risk threshold of 50), often with multiple long term  
21 conditions and high Charlson Comorbidity Index levels, indicating serious medical needs. However,  
22 these patients already have high use of outpatient care and very high GP visit rates. This suggests simple  
23 access to ambulatory care is not the issue, but prevention needs to look at care coordination and  
24 management of complex problems and at the ability of patients and their families to manage chronic  
25 illness. High risk patients identified by the models also have relatively high rates of mental illness (27-  
26 32% at risk threshold of 50) and moderate levels of alcohol abuse, factors that are likely to complicate  
27 any intervention strategy.  
28  
29  
30  
31  
32  
33  
34  
35  
36  
37  
38

39 It is also important to note the limitations of these data in helping frame the design of any intervention  
40 strategy. Other studies have documented that high risk patients often have important characteristics  
41 related to care needs and patient capacity not captured by administrative data and EMRs. For example,  
42 interviews with high risk patients and their families have documented high levels of social isolation for  
43 many, as well as precarious housing status.[16] These non-medical factors are likely to have significant  
44 impact on health status and utilization patterns. Moreover, not much is known about how/whether  
45 care coordination and management has actually failed for these patients. Are these high risk patients  
46 just very sick patients whose hospitalizations are largely not preventable/avoidable [17], or has the care  
47 delivery system failed in some important dimensions that can be corrected with improved care  
48 coordination and management? These data cannot answer this very critical question, and it is clear that  
49 the field would benefit from further study that examined the circumstances of patients identified as  
50  
51  
52  
53  
54  
55  
56  
57  
58  
59  
60

1  
2  
3 high risk by predictive modeling algorithms to sort out more clearly the factors contributing to high rates  
4 of emergency admission.  
5  
6

7  
8 This study does document the value of incorporating data sets beyond inpatient records. The addition  
9 of A&E and outpatient records resulted in identification of more high risk patients with little or no loss of  
10 predictive accuracy. These data sets are readily available and have standardized reporting formats that  
11 facilitate analysis. While the absence of useful diagnostic information in these data sets is a limiting  
12 factor, the improvement in case finding and usefulness in descriptive profiling of high risk patients to  
13 help in intervention design (e.g. high rates of A&E use rates, high rates of missed outpatient  
14 appointments) suggests their inclusion is clearly merited.  
15  
16  
17  
18  
19

20  
21 Use of GP EMRs presents significant challenges. While the lack of access to these data is unlikely to  
22 remain a problem, the variation in completeness and quality of data is problematic. The use of the  
23 unwieldy Read codes system makes analysis difficult, and we observed significant differences across  
24 sites in reporting patterns. Some of these differences may be caused by under reporting of diagnostic  
25 variables, others by differences in coding approaches. However, the potential improvement in case  
26 finding, especially among patients with lower rates of utilization in the pre-period, suggests these  
27 barriers are worth confronting. Our development of new variables beyond those included in prior  
28 predictive modeling efforts [8] contributed substantially to enhanced case finding, and further work on  
29 variable development is likely to lead to further improvements. Again, these data are also useful in  
30 providing descriptive information on high risk patients to help in intervention design (e.g. documenting  
31 potential targets of opportunity such as uncontrolled hypertension or diabetes).  
32  
33  
34  
35  
36  
37  
38  
39

40  
41 This study does not provide definitive findings on the value of developing individual site models  
42 compared to simply applying coefficients from multi-site or national model coefficients to local data.  
43 Our four-site regression models generally had comparable PPVs to individual site models, but for the  
44 majority of sites the four-site regression approach correctly identified somewhat fewer number patients  
45 with future admissions. Though it is tempting to speculate on whether differences in the health needs  
46 of the population or coding differences affect model performance, we did not observe any clear  
47 patterns between the areas. Our analysis is somewhat limited by the small number of sites involved  
48 which might cause somewhat greater variability in regression coefficients (regression coefficients for  
49 each of the five four-site models are available at <http://www.nuffieldtrust.org.uk/>). Development of a  
50  
51  
52  
53  
54  
55  
56  
57  
58  
59  
60

1  
2  
3 national model using SUS data only is planned to further assess the need/value of locally developed  
4 models.  
5  
6

7  
8 Finally, it is worthy of note that use of the GP registry data for the denominator also proved to be of  
9 significant importance. Many prior predictive modeling efforts have been limited to patients with  
10 utilization history in whatever data sets were included. By including all patients in an area, not just  
11 those with prior use, the impact on predictive modeling of prior use was apparently enhanced. As a  
12 result, patients with more moderate levels of prior use and morbidity were found to be of higher risk  
13 than patients with no prior use at all, and were often assigned higher risk scores than when the analysis  
14 included just patients who had prior use. Accordingly, the use of the GP registry as the denominator can  
15 improve rates of case finding and may permit identification of patients at earlier stages.  
16  
17  
18  
19  
20  
21  
22  
23  
24  
25  
26  
27  
28  
29  
30  
31  
32  
33  
34  
35  
36  
37  
38  
39  
40  
41  
42  
43  
44  
45  
46  
47  
48  
49  
50  
51  
52  
53  
54  
55  
56  
57  
58  
59  
60

## Acknowledgments

The authors wish to thank all individuals in the PCTs who contributed data used for this study during the Whole Systems Demonstrator, Virtual Wards and Social care end of life studies.

## Contributors

The preparation of data sets and input variables and costs were undertaken by TG and by IB; JB did the central modelling. MB advised on the analysis and results and managed the work of the research team at the Nuffield Trust. All authors contributed to the writing of the paper. JB is the guarantor.

## Funding and disclaimer

The research received no specific grant but was funded by the Nuffield Trust. The resulting models will be used as part of the WSD trial funded by the Department of Health.

## Competing interests

All authors have completed the Unified Competing Interest form at [www.icmje.org/coi\\_disclosure.pdf](http://www.icmje.org/coi_disclosure.pdf) and declare that no authors have any relationships with any companies that might have an interest in the submitted work in the previous 3 years; none of their spouses, partners or children have any financial relationships that may be relevant to the submitted work; and no authors have any non-financial interests that may be relevant to the submitted work.

## Ethical approval

This study only involved the analysis of pseudonymous secondary data. Since there were no identifiable human subjects, ethics approval was not required for this research and informed consent was not sought.

## Provenance and peer review

Not commissioned; externally peer reviewed.

## Data sharing statement

Details of the derived models variables and definitions are available from the authors at the Nuffield trust at [research@nuffieldtrust.org.uk](mailto:research@nuffieldtrust.org.uk).

## References

1 Section 3025 of the Affordable Care Act added section 1886(q) to the Social Security Act establishing the Hospital Readmissions Reduction Program, which requires the Center for Medicare and Medicaid Services to reduce Medicare payments to hospitals with excess rates of readmissions for selected conditions within 30 days of discharge.

2 Department of Health. Payment by Results Guidance for 2012-13. 2012. Gateway reference 17250 London: Department of Health

3 Kansagara D, Englander H, Salanitro A, Kagen D, Theobald C, Freeman M, Kripalani S Risk prediction models for hospital readmission: A systematic review. *JAMA* 2011;306(15):1688-1698

4 Billings J, Mijanovich T. Improving the Management of Care for High Cost Medicaid Patients. *Health Affairs*. 2007;26(6):1643-1655.

5 Billings J, Dixon J, Wennberg D, et al. Case Finding for Patients at Risk of Re-Hospitalisation: Development of an Algorithm to Identify High Risk Patients. *BMJ* 2006;333(7563):327-32,

6 Case Finding Algorithms for Patients at Risk of Re-hospitalisation: PARR1 and PARR 2. Kings Fund, February, 2006 ([http://www.kingsfund.org.uk/sites/files/kf/field/field\\_document/PARR-case-finding-algorithms-feb06.pdf](http://www.kingsfund.org.uk/sites/files/kf/field/field_document/PARR-case-finding-algorithms-feb06.pdf) - last accessed 04/06/2013).

7 Lewis G, Curry N and Bardsley M Choosing a predictive risk model: a guide for commissioners in England

8 Combined Predictive Model: Final Report. Kings Fund, Dec 2006. ([http://www.kingsfund.org.uk/sites/files/kf/field/field\\_document/PARR-combined-predictive-model-final-report-dec06.pdf](http://www.kingsfund.org.uk/sites/files/kf/field/field_document/PARR-combined-predictive-model-final-report-dec06.pdf) last accessed 04/06/2013),

9 Wales Predictive Model: Final Report and Technical Documentation, 2008 (<http://www.nliah.com/portal/microsites/Uploads/Resources/k5cma8PPy.pdf> last accessed 04/06/2013).

10 <http://systems.hscic.gov.uk/data/uktc/readcodes> - last accessed 14/05/2013

11 <http://www.connectingforhealth.nhs.uk/systemsandservices/sus> - last accessed 14/1/2013.

12 National Institute of Standards and Technology. Secure Hash Standard (180-3). October 2008.

([http://csrc.nist.gov/publications/fips/fips180-3/fips180-3\\_final.pdf](http://csrc.nist.gov/publications/fips/fips180-3/fips180-3_final.pdf) last accessed 30 July 2013)

13 Charlson ME, Popei P, Ales KL, et al. A new method of classifying prognostic comorbidity in longitudinal studies: development and validation. *Journal of Chronic Disease*. 1987;40:373-383.

14 Dixon J, Smith P, Gravelle H, Martin S, Bardsley M, Rice H, Georghiou T, Dusheiko M, Billings J, De Lorenzo M. I. A person based formula for allocating commissioning funds to general practices in England: development of a statistical model *BMJ* 2011;343:d6608 doi: 10.1136/bmj.d6608 Published 22 November 2011.

15 Chenore T, Pereira Gray DJ, Forrer J, Wright C., Evans PH, Emergency hospital admissions for the elderly: insights from the Devon Predictive Model *J Public Health* (2013)

1  
2  
3 16 Raven M, Billings J, Goldfrank L, Manheimer E, Gourevitch M. Medicaid Patients at High Risk for Frequent  
4 Hospital Admission: Real-time Identification and Remedial Risks. Journal of Urban Health. 2009;86(2):230-241.  
5

6  
7 17 Joynt KE, Gawande AA, Orav EJ, JHA AK. Contribution of Preventable Acute Care Spending to Total Spending  
8 for High-Cost Medicare Patients. JAMA. 2013;309(24):2572-2578.  
9  
10  
11  
12  
13  
14  
15  
16  
17  
18  
19  
20  
21  
22  
23  
24  
25  
26  
27  
28  
29  
30  
31  
32  
33  
34  
35  
36  
37  
38  
39  
40  
41  
42  
43  
44  
45  
46  
47  
48  
49  
50  
51  
52  
53  
54  
55  
56  
57  
58  
59  
60

For peer review only



1  
2  
3  
4  
5  
6  
7  
8  
9  
10  
11  
12  
13  
14  
15  
16  
17  
18  
19  
20  
21  
22  
23  
24  
25  
26  
27  
28  
29  
30  
31  
32  
33  
34  
35  
36  
37  
38  
39  
40  
41  
42  
43  
44  
45  
46  
47  
48  
49

**Appendix A.** PPV and sensitivity IPAEOP and IPAEOPGP models. Individual site runs.

| Risk Score Threshold | IP+AE+OP Data |             |          |             |       |             |         |             |           |             |
|----------------------|---------------|-------------|----------|-------------|-------|-------------|---------|-------------|-----------|-------------|
|                      | Newham        |             | Cornwall |             | Kent  |             | Croydon |             | Redbridge |             |
|                      | PPV           | Sensitivity | PPV      | Sensitivity | PPV   | Sensitivity | PPV     | Sensitivity | PPV       | Sensitivity |
| 1                    | 0.049         | 1.000       | 0.061    | 1.000       | 0.052 | 1.000       | 0.046   | 1.000       | 0.047     | 1.000       |
| 10                   | 0.236         | 0.361       | 0.216    | 0.391       | 0.213 | 0.339       | 0.241   | 0.378       | 0.238     | 0.425       |
| 20                   | 0.368         | 0.201       | 0.328    | 0.188       | 0.326 | 0.158       | 0.377   | 0.210       | 0.357     | 0.236       |
| 30                   | 0.450         | 0.136       | 0.406    | 0.109       | 0.401 | 0.094       | 0.444   | 0.142       | 0.420     | 0.149       |
| 40                   | 0.506         | 0.098       | 0.477    | 0.072       | 0.457 | 0.062       | 0.486   | 0.100       | 0.475     | 0.098       |
| 50                   | 0.552         | 0.071       | 0.520    | 0.047       | 0.513 | 0.043       | 0.528   | 0.073       | 0.512     | 0.067       |
| 60                   | 0.585         | 0.052       | 0.560    | 0.030       | 0.569 | 0.031       | 0.580   | 0.055       | 0.532     | 0.044       |
| 70                   | 0.632         | 0.037       | 0.622    | 0.021       | 0.618 | 0.022       | 0.610   | 0.040       | 0.555     | 0.028       |
| 80                   | 0.678         | 0.024       | 0.655    | 0.013       | 0.673 | 0.014       | 0.659   | 0.028       | 0.571     | 0.016       |
| 90                   | 0.717         | 0.013       | 0.692    | 0.007       | 0.724 | 0.008       | 0.710   | 0.016       | 0.617     | 0.008       |
| Top 1%               | 0.501         | 0.102       | 0.470    | 0.077       | 0.417 | 0.080       | 0.482   | 0.106       | 0.474     | 0.101       |
| Top 5%               | 0.287         | 0.291       | 0.292    | 0.240       | 0.259 | 0.249       | 0.290   | 0.318       | 0.296     | 0.316       |

| Risk Score Threshold | IP+AE+OP+GP Data |             |          |             |       |             |         |             |           |             |
|----------------------|------------------|-------------|----------|-------------|-------|-------------|---------|-------------|-----------|-------------|
|                      | Newham           |             | Cornwall |             | Kent  |             | Croydon |             | Redbridge |             |
|                      | PPV              | Sensitivity | PPV      | Sensitivity | PPV   | Sensitivity | PPV     | Sensitivity | PPV       | Sensitivity |
| 1                    | 0.049            | 1.000       | 0.061    | 1.000       | 0.052 | 1.000       | 0.046   | 1.000       | 0.047     | 1.000       |
| 10                   | 0.228            | 0.410       | 0.213    | 0.439       | 0.210 | 0.392       | 0.237   | 0.452       | 0.237     | 0.457       |
| 20                   | 0.360            | 0.235       | 0.323    | 0.232       | 0.314 | 0.194       | 0.358   | 0.267       | 0.348     | 0.272       |
| 30                   | 0.439            | 0.152       | 0.410    | 0.136       | 0.397 | 0.113       | 0.442   | 0.174       | 0.423     | 0.172       |
| 40                   | 0.499            | 0.103       | 0.481    | 0.084       | 0.459 | 0.072       | 0.494   | 0.114       | 0.482     | 0.113       |
| 50                   | 0.566            | 0.074       | 0.545    | 0.053       | 0.521 | 0.048       | 0.550   | 0.079       | 0.522     | 0.073       |
| 60                   | 0.606            | 0.052       | 0.602    | 0.033       | 0.580 | 0.032       | 0.589   | 0.052       | 0.563     | 0.047       |
| 70                   | 0.657            | 0.036       | 0.659    | 0.021       | 0.644 | 0.021       | 0.643   | 0.035       | 0.616     | 0.030       |
| 80                   | 0.723            | 0.021       | 0.714    | 0.013       | 0.694 | 0.013       | 0.694   | 0.021       | 0.651     | 0.018       |
| 90                   | 0.766            | 0.012       | 0.745    | 0.006       | 0.752 | 0.007       | 0.735   | 0.011       | 0.655     | 0.007       |
| Top 1%               | 0.504            | 0.102       | 0.490    | 0.081       | 0.438 | 0.084       | 0.502   | 0.110       | 0.487     | 0.104       |
| Top 5%               | 0.296            | 0.300       | 0.309    | 0.254       | 0.272 | 0.262       | 0.307   | 0.337       | 0.312     | 0.333       |

## Appendix B Regression coefficients. IPAEOP and IPAEOPGP models. Individual site runs.

|                                                       | IP+AE+OP Data |        |        |        |        | IP+AE+OP+GP Data |        |        |        |        |
|-------------------------------------------------------|---------------|--------|--------|--------|--------|------------------|--------|--------|--------|--------|
|                                                       | NH            | CW     | KT     | CR     | RB     | NH               | CW     | KT     | CR     | RB     |
| Age                                                   | 0.015         | 0.003  | 0.009  | 0.010  | 0.019  | 0.001            | -0.004 | 0.002  | 0.001  | 0.009  |
| Age 65-74                                             | 0.280         | 0.409  | 0.295  | 0.380  | 0.261  | 0.236            | 0.276  | 0.203  | 0.244  | 0.245  |
| Age 75-84                                             | 0.738         | 0.905  | 0.731  | 0.847  | 0.734  | 0.721            | 0.672  | 0.605  | 0.708  | 0.749  |
| Age 85+                                               | 1.076         | 1.483  | 1.226  | 1.178  | 1.109  | 1.150            | 1.206  | 1.086  | 1.187  | 1.213  |
| Female                                                | 0.239         | 0.002  | 0.044  | 0.178  | 0.058  | 0.114            | -0.095 | -0.075 | -0.014 | -0.030 |
| Practice IMD                                          | 0.013         | 0.003  | 0.016  | 0.018  | 0.012  | 0.008            | 0.004  | 0.017  | 0.010  | 0.015  |
| Months registered 1 yr prior                          | 0.014         | -0.011 | -0.005 | -0.018 | -0.013 | 0.011            | -0.011 | -0.003 | -0.010 | -0.006 |
| Months registered 2 yrs prior                         | -0.022        | -0.019 | -0.016 | -0.007 | -0.023 | -0.021           | -0.024 | -0.019 | -0.011 | -0.021 |
| EM Adms prior 0-90 days                               | 0.382         | 0.471  | 0.321  | 0.310  | 0.282  | 0.367            | 0.420  | 0.283  | 0.269  | 0.259  |
| EL Adms prior 0-90 days                               | 0.045         | 0.216  | 0.155  | 0.153  | 0.148  | 0.033            | 0.159  | 0.074  | 0.097  | 0.069  |
| Any attender prior 0-90 days                          | 0.115         | 0.027  | 0.001  | 0.041  | 0.073  | 0.135            | 0.026  | 0.010  | 0.042  | 0.064  |
| Any day case prior 0-90 days                          | 0.094         | 0.234  | 0.110  | 0.111  | 0.251  | 0.037            | 0.173  | 0.039  | -0.019 | 0.130  |
| EM Adms prior 91-180 days                             | 0.215         | 0.310  | 0.351  | 0.282  | 0.185  | 0.217            | 0.262  | 0.297  | 0.243  | 0.160  |
| EL Adms prior 91-180 days                             | 0.321         | 0.150  | 0.062  | 0.204  | 0.081  | 0.283            | 0.128  | 0.027  | 0.118  | 0.024  |
| EM Adms prior 181-365 days                            | 0.113         | 0.345  | 0.350  | 0.248  | 0.146  | 0.124            | 0.289  | 0.292  | 0.227  | 0.129  |
| EL Adms prior 181-365 days                            | 0.097         | 0.120  | 0.104  | 0.118  | 0.170  | 0.072            | 0.079  | 0.060  | 0.035  | 0.108  |
| Em Adms 2 yrs prior                                   | 0.102         | 0.269  | 0.307  | 0.181  | 0.143  | 0.116            | 0.216  | 0.250  | 0.178  | 0.149  |
| Any day case 2 yrs prior                              | 0.096         | 0.157  | 0.186  | 0.151  | 0.179  | 0.058            | 0.092  | 0.112  | 0.005  | 0.103  |
| DX MI                                                 | -0.108        | 0.097  | -0.105 | -0.004 | 0.376  | -0.197           | -0.003 | -0.163 | -0.111 | 0.228  |
| DX CHF                                                | -0.348        | -0.070 | -0.246 | -0.069 | -0.337 | -0.370           | -0.178 | -0.269 | -0.110 | -0.216 |
| DX CVD                                                | 0.296         | 0.227  | 0.033  | 0.037  | -0.040 | 0.269            | 0.166  | -0.001 | -0.099 | -0.061 |
| CD CTD                                                | 0.030         | -0.024 | 0.101  | -0.380 | -0.029 | 0.071            | -0.192 | -0.010 | -0.427 | -0.039 |
| DX PVD                                                | -0.245        | 0.124  | 0.099  | -0.100 | 0.021  | -0.253           | 0.048  | 0.026  | -0.096 | 0.003  |
| DX Asthma                                             | 0.082         | 0.143  | 0.184  | 0.099  | 0.192  | -0.114           | -0.107 | -0.023 | -0.081 | 0.028  |
| DX COPD                                               | 0.204         | 0.251  | 0.277  | 0.193  | 0.123  | -0.169           | -0.139 | -0.036 | -0.330 | -0.269 |
| DX Diabetes                                           | 0.240         | 0.303  | 0.285  | 0.253  | 0.276  | -0.046           | -0.052 | -0.016 | -0.124 | 0.011  |
| DX Diabetes with complications                        | 0.059         | -0.221 | 0.062  | -0.014 | 0.334  | 0.062            | -0.176 | 0.095  | 0.004  | 0.262  |
| DX Renal Disease                                      | 0.408         | 0.022  | 0.085  | 0.128  | 0.199  | 0.356            | 0.005  | 0.073  | 0.063  | 0.120  |
| DX Cancer                                             | -0.165        | -0.019 | -0.062 | -0.308 | 0.041  | 0.041            | 0.098  | -0.010 | -0.207 | 0.034  |
| DX Mental                                             | 0.498         | 0.316  | 0.363  | 0.484  | 0.077  | 0.340            | 0.131  | 0.111  | 0.266  | -0.061 |
| DX Alcohol                                            | 0.569         | 0.684  | 0.578  | 0.673  | 0.974  | 0.281            | 0.530  | 0.357  | 0.409  | 0.754  |
| DX Dementia                                           | -0.548        | -0.589 | -0.551 | -0.402 | -0.596 | -0.530           | -0.486 | -0.440 | -0.669 | -0.641 |
| DX Cognitive Impairment                               | -0.117        | 0.016  | 0.025  | 0.110  | 0.187  | -0.075           | 0.046  | 0.031  | 0.088  | 0.152  |
| DX ACS Condition                                      | 0.364         | 0.270  | 0.239  | 0.267  | 0.306  | 0.269            | 0.161  | 0.134  | 0.114  | 0.224  |
| Charlson Index                                        | 0.055         | 0.063  | 0.060  | 0.101  | 0.025  | 0.048            | 0.062  | 0.037  | 0.086  | 0.029  |
| AE visits prior 0-90 days                             | 0.236         | 0.267  | 0.355  | 0.309  | 0.359  | 0.179            | 0.230  | 0.265  | 0.199  | 0.260  |
| AE unplanned follow-up visits prior 0-90 days         | -0.094        | -0.583 | -0.533 | -0.874 | -0.383 | -0.107           | -0.566 | -0.452 | -0.703 | -0.315 |
| AE X-ray prior 0-90 days                              | 0.348         | 0.437  | 0.058  | 0.104  | 0.367  | 0.303            | 0.382  | 0.027  | 0.040  | 0.317  |
| AE visits prior 91-180 days                           | 0.265         | 0.262  | 0.220  | 0.225  | 0.277  | 0.197            | 0.225  | 0.165  | 0.142  | 0.210  |
| AE unplanned follow-up visits prior 91-180 days       | -0.023        | -0.560 | -0.229 | -0.296 | -0.298 | -0.026           | -0.543 | -0.177 | -0.225 | -0.286 |
| AE X-ray prior 91-180 days                            | 0.227         | 0.117  | 0.120  | 0.346  | -0.064 | 0.210            | 0.015  | 0.101  | 0.237  | 0.010  |
| AE visits prior 181-365 days                          | 0.264         | 0.205  | 0.135  | 0.171  | 0.181  | 0.216            | 0.174  | 0.090  | 0.115  | 0.138  |
| AE unplanned follow-up visits prior 181-365 days      | -0.251        | -0.490 | -0.184 | -0.261 | -0.203 | -0.214           | -0.449 | -0.131 | -0.175 | -0.221 |
| AE X-ray prior 181-365 days                           | 0.262         | -0.040 | 0.281  | 0.324  | 0.110  | 0.225            | 0.085  | 0.251  | 0.244  | 0.072  |
| AE visits 2 yrs prior                                 | 0.211         | 0.159  | 0.154  | 0.140  | 0.160  | 0.170            | 0.138  | 0.114  | 0.077  | 0.121  |
| AE unplanned follow-up visits 2 yrs prior             | -0.307        | -0.352 | -0.239 | -0.433 | -0.339 | -0.228           | -0.317 | -0.178 | -0.262 | -0.288 |
| AE X-ray 2yrs prior                                   | 0.083         | 0.231  | 0.100  | 0.128  | 0.179  | 0.063            | 0.390  | 0.082  | 0.069  | 0.152  |
| Outpatient specialty visits prior 0-90 days           | 0.046         | 0.055  | 0.091  | 0.061  | 0.059  | 0.025            | 0.033  | 0.047  | 0.030  | 0.027  |
| Outpatient specialty visits missed prior 0-90 days    | 0.155         | 0.182  | 0.250  |        | 0.146  | 0.108            | 0.118  | 0.171  |        | 0.097  |
| Outpatient specialty visits prior 91-180 days         | 0.030         | 0.013  | 0.023  | 0.034  | 0.029  | 0.007            | 0.003  | -0.004 | 0.015  | 0.011  |
| Outpatient specialty visits missed prior 91-180 days  | 0.113         | 0.239  | 0.168  |        | 0.193  | 0.087            | 0.184  | 0.113  |        | 0.159  |
| Outpatient specialty visits prior 181-365 days        | 0.016         | 0.010  | -0.005 | 0.019  | 0.031  | -0.003           | 0.001  | -0.024 | 0.003  | 0.018  |
| Outpatient specialty visits missed prior 181-365 days | 0.128         | 0.164  | 0.075  |        | 0.140  | 0.086            | 0.095  | 0.036  |        | 0.122  |
| Outpatient specialty visits 2 yrs prior               | 0.019         | 0.030  | 0.014  | 0.028  | 0.019  | 0.008            | 0.014  | -0.009 | 0.011  | 0.021  |

|    |                                                         |        |        |        |        |        |        |        |        |        |        |
|----|---------------------------------------------------------|--------|--------|--------|--------|--------|--------|--------|--------|--------|--------|
| 1  | Outpatient specialty visits missed 2 yrs prior          | 0.142  | 0.162  | 0.140  | 0.190  | 0.082  | 0.097  | 0.090  | 0.085  | 0.129  | 0.057  |
| 2  | GP DX COPD                                              |        |        |        |        |        | 0.218  | 0.174  | 0.112  | 0.287  | 0.295  |
| 3  | GP - 1 long term condition                              |        |        |        |        |        | 0.131  | 0.025  | 0.017  | 0.106  | 0.192  |
| 4  | GP - 2 or more long term conditions                     |        |        |        |        |        | 0.166  | 0.109  | 0.038  | 0.070  | 0.182  |
| 5  | GP - Glomerular filtration rate group 3 last 0-365 days |        |        |        |        |        | -0.075 | 0.092  | -0.017 |        | 0.050  |
| 7  | GP - 10+ unique drugs prescribed                        |        |        |        |        |        | 0.342  | 0.570  | 0.166  | 2.741  | 1.949  |
| 8  | GP - 5-9 unique drugs prescribed                        |        |        |        |        |        | 0.424  | 0.444  | 0.164  | 2.804  | 1.953  |
| 9  | GP - 0-4 unique drugs prescribed                        |        |        |        |        |        | 0.328  | 0.254  | 0.114  | 2.559  | 1.809  |
| 10 | GP - Psychoactive substance misuse disorder             |        |        |        |        |        | 0.388  | 0.323  | 0.583  | 0.431  | 0.810  |
| 11 | GP - 7+ distinct disorders                              |        |        |        |        |        | -0.049 | 0.057  | 0.017  | -0.163 | -0.062 |
| 12 | GP - GP visits prior 0-3 months                         |        |        |        |        |        | -0.001 | 0.008  | 0.022  | 0.021  | 0.042  |
| 13 | GP - GP visits prior 4-6 months                         |        |        |        |        |        | 0.015  | 0.004  | 0.012  | 0.009  | 0.019  |
| 14 | GP - GP visits prior 7-12 months                        |        |        |        |        |        | 0.005  | 0.003  | 0.007  | 0.000  | 0.008  |
| 15 | GP - GP visits 2yrs prior                               |        |        |        |        |        | 0.000  | 0.002  | 0.004  | 0.006  | 0.002  |
| 16 | GP - Increasing rate of GP visits during last 12 months |        |        |        |        |        | 0.184  | 0.087  | 0.126  | 0.207  | 0.094  |
| 17 | GP - Number of high risk BNFs                           |        |        |        |        |        | 0.063  | 0.006  | -0.036 | -0.026 | -0.075 |
| 18 | GP - Any high risk                                      |        |        |        |        |        | 0.219  | 0.202  | 0.241  | 0.324  | 0.249  |
| 19 | GP - Count of BNF chapters                              |        |        |        |        |        | 0.066  | 0.053  | 0.059  | 0.066  | -0.024 |
| 20 | GP - DX Dementia                                        |        |        |        |        |        | 0.421  | 0.266  | 0.296  | 0.471  | 0.437  |
| 21 | GP - Exception reported from quality indicators         |        |        |        |        |        | 0.157  | 0.108  | 0.111  | 0.118  | 0.132  |
| 22 | GP - Health visitor or district nurse visit             |        |        |        |        |        | 0.278  | 0.244  | 0.199  | 0.168  | 0.184  |
| 23 | GP - Record of IHD/angina                               |        |        |        |        |        | 0.069  | -0.048 | 0.110  | -0.062 | 0.081  |
| 24 | GP - Nebuliser used                                     |        |        |        |        |        | 0.113  | 0.315  | 0.207  | 0.191  | 0.448  |
| 25 | GP - Salbutamol prescribed                              |        |        |        |        |        | 0.021  | 0.017  | 0.074  | 0.000  | -0.011 |
| 26 | GP - Warfarin prescribed                                |        |        |        |        |        | -0.041 | 0.031  | -0.026 | -0.100 | -0.244 |
| 27 | GP - High blood pressure                                |        |        |        |        |        | -0.040 | -0.001 | -0.013 | -0.048 | -0.087 |
| 28 | GP - Smoker                                             |        |        |        |        |        | 0.298  | 0.231  | 0.248  | 0.240  | 0.220  |
| 29 | GP - BMI 30+                                            |        |        |        |        |        | 0.050  | 0.002  | 0.085  | 0.046  | 0.199  |
| 30 | GP - HbA1c > 10                                         |        |        |        |        |        | 0.236  | 0.270  | 0.210  | 0.362  | 0.354  |
| 31 | GD - QOF ARTF                                           |        |        |        |        |        | 0.176  | 0.064  | 0.095  | -0.047 | 0.143  |
| 32 | GP - QOF CKD                                            |        |        |        |        |        | 0.206  | -0.003 | -0.037 | 0.091  | 0.210  |
| 33 | GP - QOF Depression                                     |        |        |        |        |        | 0.069  | 0.248  | 0.183  | 0.133  | 0.186  |
| 34 | GP - Number of QOF DX categories 3+                     |        |        |        |        |        | 0.003  | -0.023 | -0.072 | -0.135 | -0.009 |
| 35 | GP - Number of phone contacts last 0-3 months           |        |        |        |        |        | -0.004 | 0.046  | 0.004  | -0.005 | -0.004 |
| 36 | Constant                                                | -4.665 | -3.262 | -3.987 | -4.363 | -4.368 | -4.381 | -3.275 | -4.069 | -6.497 | -5.939 |

## Appendix C Regression significance levels. IPAEOP and IPAEOPGP models. Individual site runs.

|                                                       | IP+AE+OP Data |       |       |       |       | IP+AE+OP+GP Data |       |       |       |       |
|-------------------------------------------------------|---------------|-------|-------|-------|-------|------------------|-------|-------|-------|-------|
|                                                       | NH            | CW    | KT    | CR    | RB    | NH               | CW    | KT    | CR    | RB    |
| Age                                                   | 0.000         | 0.000 | 0.000 | 0.000 | 0.000 | 0.344            | 0.000 | 0.001 | 0.158 | 0.000 |
| Age 65-74                                             | 0.000         | 0.000 | 0.000 | 0.000 | 0.000 | 0.000            | 0.000 | 0.000 | 0.000 | 0.000 |
| Age 75-84                                             | 0.000         | 0.000 | 0.000 | 0.000 | 0.000 | 0.000            | 0.000 | 0.000 | 0.000 | 0.000 |
| Age 85+                                               | 0.000         | 0.000 | 0.000 | 0.000 | 0.000 | 0.000            | 0.000 | 0.000 | 0.000 | 0.000 |
| Female                                                | 0.007         | 0.897 | 0.000 | 0.001 | 0.125 | 0.000            | 0.000 | 0.000 | 0.466 | 0.165 |
| Practice IMD                                          | 0.008         | 0.036 | 0.000 | 0.000 | 0.000 | 0.015            | 0.010 | 0.000 | 0.000 | 0.000 |
| Months registered 1 yr prior                          | 0.002         | 0.006 | 0.085 | 0.247 | 0.047 | 0.009            | 0.011 | 0.387 | 0.026 | 0.255 |
| Months registered 2 yrs prior                         | 0.001         | 0.014 | 0.006 | 0.232 | 0.276 | 0.009            | 0.003 | 0.001 | 0.211 | 0.025 |
| EM Adms prior 0-90 days                               | 0.000         | 0.000 | 0.000 | 0.000 | 0.000 | 0.000            | 0.000 | 0.000 | 0.000 | 0.000 |
| EL Adms prior 0-90 days                               | 0.664         | 0.000 | 0.000 | 0.029 | 0.081 | 0.714            | 0.000 | 0.070 | 0.102 | 0.373 |
| Any attender prior 0-90 days                          | 0.002         | 0.000 | 0.955 | 0.006 | 0.004 | 0.001            | 0.000 | 0.489 | 0.005 | 0.008 |
| Any day case prior 0-90 days                          | 0.769         | 0.000 | 0.001 | 0.682 | 0.001 | 0.561            | 0.000 | 0.233 | 0.699 | 0.015 |
| EM Adms prior 91-180 days                             | 0.000         | 0.000 | 0.000 | 0.000 | 0.000 | 0.000            | 0.000 | 0.000 | 0.000 | 0.002 |
| EL Adms prior 91-180 days                             | 0.000         | 0.000 | 0.068 | 0.022 | 0.528 | 0.000            | 0.001 | 0.437 | 0.016 | 0.680 |
| EM Adms prior 181-365 days                            | 0.000         | 0.000 | 0.000 | 0.000 | 0.000 | 0.001            | 0.000 | 0.000 | 0.000 | 0.000 |
| EL Adms prior 181-365 days                            | 0.548         | 0.000 | 0.000 | 0.757 | 0.019 | 0.167            | 0.009 | 0.030 | 0.372 | 0.014 |
| Em Adms 2 yrs prior                                   | 0.000         | 0.000 | 0.000 | 0.000 | 0.000 | 0.000            | 0.000 | 0.000 | 0.000 | 0.000 |
| Any day case 2 yrs prior                              | 0.877         | 0.000 | 0.000 | 0.536 | 0.035 | 0.177            | 0.000 | 0.000 | 0.864 | 0.005 |
| DX MI                                                 | 0.366         | 0.134 | 0.049 | 0.611 | 0.000 | 0.076            | 0.966 | 0.002 | 0.216 | 0.017 |
| DX CHF                                                | 0.024         | 0.253 | 0.000 | 0.448 | 0.008 | 0.001            | 0.005 | 0.000 | 0.194 | 0.026 |
| DX CVD                                                | 0.015         | 0.000 | 0.446 | 0.610 | 0.571 | 0.013            | 0.002 | 0.977 | 0.179 | 0.504 |
| CD CTD                                                | 0.263         | 0.756 | 0.150 | 0.010 | 0.759 | 0.645            | 0.013 | 0.891 | 0.000 | 0.766 |
| DX PVD                                                | 0.230         | 0.061 | 0.097 | 0.567 | 0.665 | 0.079            | 0.462 | 0.661 | 0.270 | 0.982 |
| DX Asthma                                             | 0.351         | 0.002 | 0.000 | 0.241 | 0.015 | 0.135            | 0.024 | 0.580 | 0.184 | 0.698 |
| DX COPD                                               | 0.005         | 0.000 | 0.000 | 0.009 | 0.098 | 0.098            | 0.021 | 0.483 | 0.002 | 0.041 |
| DX Diabetes                                           | 0.000         | 0.000 | 0.000 | 0.000 | 0.000 | 0.444            | 0.227 | 0.649 | 0.016 | 0.845 |
| DX Diabetes with complications                        | 0.478         | 0.025 | 0.540 | 0.363 | 0.013 | 0.674            | 0.073 | 0.347 | 0.973 | 0.083 |
| DX Renal Disease                                      | 0.000         | 0.731 | 0.142 | 0.068 | 0.025 | 0.001            | 0.942 | 0.208 | 0.405 | 0.210 |
| DX Cancer                                             | 0.753         | 0.751 | 0.271 | 0.001 | 0.421 | 0.727            | 0.104 | 0.862 | 0.009 | 0.721 |
| DX Mental                                             | 0.000         | 0.000 | 0.000 | 0.000 | 0.370 | 0.000            | 0.005 | 0.008 | 0.000 | 0.447 |
| DX Alcohol                                            | 0.000         | 0.000 | 0.000 | 0.000 | 0.000 | 0.029            | 0.000 | 0.000 | 0.000 | 0.000 |
| DX Dementia                                           | 0.005         | 0.000 | 0.000 | 0.000 | 0.000 | 0.004            | 0.000 | 0.000 | 0.000 | 0.000 |
| DX Cognitive Impairment                               | 0.430         | 0.804 | 0.620 | 0.191 | 0.026 | 0.456            | 0.474 | 0.534 | 0.199 | 0.080 |
| DX ACS Condition                                      | 0.000         | 0.000 | 0.000 | 0.000 | 0.000 | 0.000            | 0.000 | 0.000 | 0.001 | 0.000 |
| Charlson Index                                        | 0.012         | 0.000 | 0.000 | 0.000 | 0.212 | 0.042            | 0.000 | 0.006 | 0.000 | 0.160 |
| AE visits prior 0-90 days                             | 0.000         | 0.000 | 0.000 | 0.000 | 0.000 | 0.000            | 0.000 | 0.000 | 0.000 | 0.000 |
| AE unplanned follow-up visits prior 0-90 days         | 0.895         | 0.001 | 0.000 | 0.000 | 0.133 | 0.654            | 0.001 | 0.000 | 0.000 | 0.121 |
| AE X-ray prior 0-90 days                              | 0.002         | 0.000 | 0.301 | 0.374 | 0.052 | 0.004            | 0.002 | 0.636 | 0.662 | 0.035 |
| AE visits prior 91-180 days                           | 0.000         | 0.000 | 0.000 | 0.000 | 0.000 | 0.000            | 0.000 | 0.000 | 0.000 | 0.000 |
| AE unplanned follow-up visits prior 91-180 days       | 0.836         | 0.000 | 0.000 | 0.149 | 0.130 | 0.899            | 0.000 | 0.005 | 0.214 | 0.055 |
| AE X-ray prior 91-180 days                            | 0.070         | 0.582 | 0.045 | 0.002 | 0.672 | 0.062            | 0.946 | 0.090 | 0.009 | 0.985 |
| AE visits prior 181-365 days                          | 0.000         | 0.000 | 0.000 | 0.000 | 0.000 | 0.000            | 0.000 | 0.000 | 0.000 | 0.000 |
| AE unplanned follow-up visits prior 181-365 days      | 0.182         | 0.000 | 0.001 | 0.122 | 0.124 | 0.098            | 0.001 | 0.013 | 0.127 | 0.041 |
| AE X-ray prior 181-365 days                           | 0.000         | 0.936 | 0.000 | 0.000 | 0.461 | 0.001            | 0.866 | 0.000 | 0.000 | 0.485 |
| AE visits 2 yrs prior                                 | 0.000         | 0.000 | 0.000 | 0.000 | 0.000 | 0.000            | 0.000 | 0.000 | 0.000 | 0.000 |
| AE unplanned follow-up visits 2 yrs prior             | 0.021         | 0.008 | 0.000 | 0.003 | 0.009 | 0.020            | 0.016 | 0.000 | 0.008 | 0.005 |
| AE X-ray 2yrs prior                                   | 0.183         | 0.555 | 0.019 | 0.022 | 0.005 | 0.210            | 0.320 | 0.048 | 0.161 | 0.006 |
| Outpatient specialty visits prior 0-90 days           | 0.000         | 0.000 | 0.000 | 0.000 | 0.000 | 0.000            | 0.000 | 0.000 | 0.000 | 0.000 |
| Outpatient specialty visits missed prior 0-90 days    | 0.000         | 0.000 | 0.000 |       | 0.002 | 0.000            | 0.000 | 0.000 |       | 0.008 |
| Outpatient specialty visits prior 91-180 days         | 0.196         | 0.043 | 0.003 | 0.002 | 0.016 | 0.516            | 0.630 | 0.648 | 0.054 | 0.184 |
| Outpatient specialty visits missed prior 91-180 days  | 0.027         | 0.000 | 0.000 |       | 0.000 | 0.039            | 0.000 | 0.002 |       | 0.000 |
| Outpatient specialty visits prior 181-365 days        | 0.763         | 0.009 | 0.400 | 0.094 | 0.000 | 0.595            | 0.844 | 0.000 | 0.491 | 0.002 |
| Outpatient specialty visits missed prior 181-365 days | 0.000         | 0.000 | 0.009 |       | 0.000 | 0.001            | 0.002 | 0.206 |       | 0.000 |
| Outpatient specialty visits 2 yrs prior               | 0.000         | 0.000 | 0.000 | 0.000 | 0.000 | 0.068            | 0.000 | 0.046 | 0.001 | 0.000 |

|    |                                       |       |       |       |       |       |       |       |       |       |       |       |
|----|---------------------------------------|-------|-------|-------|-------|-------|-------|-------|-------|-------|-------|-------|
| 1  | Outpatient specialty visits missed 2  |       |       |       |       |       |       |       |       |       |       |       |
| 2  | yrs prior                             | 0.000 | 0.000 | 0.000 | 0.000 | 0.001 | 0.000 | 0.006 | 0.000 | 0.000 | 0.000 | 0.000 |
| 3  | GP DX COPD                            |       |       |       |       |       | 0.002 | 0.000 | 0.001 | 0.000 | 0.000 | 0.003 |
| 4  | GP - 1 long term condition            |       |       |       |       |       | 0.000 | 0.229 | 0.310 | 0.000 | 0.000 | 0.000 |
| 5  | GP - 2 or more long term              |       |       |       |       |       |       |       |       |       |       |       |
| 6  | conditions                            |       |       |       |       |       | 0.001 | 0.000 | 0.100 | 0.098 | 0.000 |       |
| 7  | GP - Glomerular filtration rate       |       |       |       |       |       |       |       |       |       |       |       |
| 8  | group 3 last 0-365 days               |       |       |       |       |       | 0.097 | 0.002 | 0.463 |       |       | 0.162 |
| 9  | GP - 10+ unique drugs prescribed      |       |       |       |       |       | 0.000 | 0.000 | 0.000 | 0.000 | 0.000 | 0.000 |
| 10 | GP - 5-9 unique drugs prescribed      |       |       |       |       |       | 0.000 | 0.000 | 0.000 | 0.000 | 0.000 | 0.000 |
| 11 | GP - 0-4 unique drugs prescribed      |       |       |       |       |       | 0.000 | 0.000 | 0.000 | 0.000 | 0.000 | 0.000 |
| 12 | GP - Psychoactive substance misuse    |       |       |       |       |       |       |       |       |       |       |       |
| 13 | disorder                              |       |       |       |       |       | 0.000 | 0.000 | 0.000 | 0.000 | 0.000 | 0.000 |
| 14 | GP - 7+ distinct disorders            |       |       |       |       |       | 0.311 | 0.290 | 0.523 | 0.002 | 0.263 |       |
| 15 | GP visits prior 0-3 months            |       |       |       |       |       | 0.873 | 0.002 | 0.000 | 0.000 | 0.000 | 0.000 |
| 16 | GP visits prior 4-6 months            |       |       |       |       |       | 0.000 | 0.182 | 0.000 | 0.008 | 0.000 |       |
| 17 | GP visits prior 7-12 months           |       |       |       |       |       | 0.075 | 0.136 | 0.000 | 0.987 | 0.006 |       |
| 18 | GP visits 2yrs prior                  |       |       |       |       |       | 0.934 | 0.013 | 0.000 | 0.000 | 0.263 |       |
| 19 | GP - Increasing rate of GP visits     |       |       |       |       |       |       |       |       |       |       |       |
| 20 | during last 12 months                 |       |       |       |       |       | 0.000 | 0.001 | 0.000 | 0.000 | 0.010 |       |
| 21 | GP - Number of high risk BNFs         |       |       |       |       |       | 0.009 | 0.691 | 0.004 | 0.216 | 0.002 |       |
| 22 | GP - Any high risk                    |       |       |       |       |       | 0.000 | 0.000 | 0.000 | 0.000 | 0.000 |       |
| 23 | GP - Count of BNF chapters            |       |       |       |       |       | 0.000 | 0.000 | 0.000 | 0.000 | 0.000 |       |
| 24 | GP - DX Dementia                      |       |       |       |       |       | 0.000 | 0.000 | 0.000 | 0.000 | 0.000 |       |
| 25 | GP - Exception reported from          |       |       |       |       |       |       |       |       |       |       |       |
| 26 | quality indicators                    |       |       |       |       |       | 0.020 | 0.003 | 0.001 | 0.020 | 0.062 |       |
| 27 | GP - Health visitor or district nurse |       |       |       |       |       |       |       |       |       |       |       |
| 28 | visit                                 |       |       |       |       |       | 0.000 | 0.000 | 0.000 | 0.000 | 0.000 |       |
| 29 | GP - Record of IHD/angina             |       |       |       |       |       | 0.355 | 0.361 | 0.006 | 0.202 | 0.288 |       |
| 30 | GP - Nebuliser used                   |       |       |       |       |       | 0.359 | 0.000 | 0.001 | 0.019 | 0.001 |       |
| 31 | GP - Salbutamol prescribed            |       |       |       |       |       | 0.550 | 0.523 | 0.001 | 0.989 | 0.795 |       |
| 32 | GP - Warfarin prescribed              |       |       |       |       |       | 0.643 | 0.423 | 0.440 | 0.106 | 0.001 |       |
| 33 | GP - High blood pressure              |       |       |       |       |       | 0.269 | 0.984 | 0.549 | 0.725 | 0.325 |       |
| 34 | GP - Smoker                           |       |       |       |       |       | 0.000 | 0.000 | 0.000 | 0.000 | 0.000 |       |
| 35 | GP - BMI 30+                          |       |       |       |       |       | 0.074 | 0.956 | 0.000 | 0.074 | 0.000 |       |
| 36 | GP - HbA1c > 10                       |       |       |       |       |       | 0.000 | 0.000 | 0.000 | 0.000 | 0.000 |       |
| 37 | GD - QOF ARTF                         |       |       |       |       |       | 0.130 | 0.240 | 0.024 | 0.586 | 0.136 |       |
| 38 | GP - QOF CKD                          |       |       |       |       |       | 0.003 | 0.924 | 0.203 | 0.063 | 0.000 |       |
| 39 | GP - QOF Depression                   |       |       |       |       |       | 0.240 | 0.000 | 0.000 | 0.024 | 0.016 |       |
| 40 | GP - Number of QOF DX categories      |       |       |       |       |       |       |       |       |       |       |       |
| 41 | 3+                                    |       |       |       |       |       | 0.974 | 0.717 | 0.123 | 0.342 | 0.948 |       |
| 42 | GP - Number of phone contacts last    |       |       |       |       |       |       |       |       |       |       |       |
| 43 | 0-3 months                            |       |       |       |       |       | 0.927 | 0.000 | 0.600 | 0.788 | 0.899 |       |
| 44 | Constant                              | 0.000 | 0.000 | 0.000 | 0.000 | 0.000 | 0.000 | 0.000 | 0.000 | 0.000 | 0.000 |       |

## Appendix D Further information of model variables

| Variable                                         | Variable description                                                             | Time period/Date                   |
|--------------------------------------------------|----------------------------------------------------------------------------------|------------------------------------|
| <b>GP register variables</b>                     |                                                                                  |                                    |
| Age                                              | Age                                                                              | End calendar year (5 months after) |
| Age 65-74                                        | Age 65-74                                                                        | End calendar year (5 months after) |
| Age 75-84                                        | Age 75-84                                                                        | End calendar year (5 months after) |
| Age 85+                                          | Age 85+                                                                          | End calendar year (5 months after) |
| Female                                           | Sex = female                                                                     | N/A                                |
| Practice IMD                                     | Index of multiple deprivation - GP practice area                                 | N/A                                |
| Months registered 1 yr prior                     | Months registered with GP prior 1-12 months                                      | Prior 1 - 12 months (inclusive)    |
| Months registered 2 yrs prior                    | Months registered with GP prior 13-24 months                                     | Prior 13 - 24 months (inclusive)   |
| <b>SUS inpatient variables</b>                   |                                                                                  |                                    |
| EM Adms prior 0-90 days                          | Number of emergency admissions - prior 1-90 days                                 | Prior 1 to 90 days (inclusive)     |
| EL Adms prior 0-90 days                          | Number of elective admissions - prior 1-90 days                                  | Prior 1 to 90 days (inclusive)     |
| Any attender prior 0-90 days                     | Any regular attendance - prior 1-90 days                                         | Prior 1 to 90 days (inclusive)     |
| EM Adms prior 91-180 days                        | Number of emergency admissions - prior 91-180 days                               | Prior 91 to 180 days (inclusive)   |
| EL Adms prior 91-180 days                        | Number of emergency admissions - prior 181-365 days                              | Prior 181 to 365 days (inclusive)  |
| Any day case prior 0-90 days                     | Any day case prior 1-90 days                                                     | Prior 1 to 90 days (inclusive)     |
| Any day case prior 91-180 days                   | Any day case prior 91-180 days                                                   | Prior 91 to 180 days (inclusive)   |
| Any day case prior 181-365 days                  | Any day case prior 181-365 days                                                  | Prior 181 to 365 days (inclusive)  |
| Any day case 2 yrs prior                         | Any day case prior 366-730 days                                                  | Prior 366 to 730 days (inclusive)  |
| Em Adms 2 yrs prior                              | Number of emergency admissions - prior 366-730 days                              | Prior 366 to 730 days (inclusive)  |
| DX Diabetes                                      | Any prim or sec diagnosis - Diabetes, prior 2 years                              | Prior 1 to 730 days (inclusive)    |
| DX MI                                            | Any prim or sec diagnosis - Myocardial infarction, prior 2 years                 | Prior 1 to 730 days (inclusive)    |
| DX CHF                                           | Any prim or sec diagnosis - Congestive heart failure, prior 2 years              | Prior 1 to 730 days (inclusive)    |
| DX PVD                                           | Any prim or sec diagnosis - Peripheral vascular disease, prior 2 years           | Prior 1 to 730 days (inclusive)    |
| DX CVD                                           | Any prim or sec diagnosis - Cerebral vascular disease, prior 2 years             | Prior 1 to 730 days (inclusive)    |
| DX Dementia                                      | Any prim or sec diagnosis - Dementia, prior 2 years                              | Prior 1 to 730 days (inclusive)    |
| CD CTD                                           | Any prim or sec diagnosis - Connective tissue disease, prior 2 years             | Prior 1 to 730 days (inclusive)    |
| DX Cancer                                        | Any prim or sec diagnosis - Malignant cancer, prior 2 years                      | Prior 1 to 730 days (inclusive)    |
| DX Diabetes with complications                   | Any prim or sec diagnosis - Diabetes with complications, prior 2 years           | Prior 1 to 730 days (inclusive)    |
| DX Renal Disease                                 | Any prim or sec diagnosis - Renal disease, prior 2 years                         | Prior 1 to 730 days (inclusive)    |
| Charlson Index                                   | Charlson Comorbidity Index, prior 2 years                                        | Prior 1 to 730 days (inclusive)    |
| DX Alcohol                                       | Any prim or sec diagnosis - Alcohol abuse, prior 2 years                         | Prior 1 to 730 days (inclusive)    |
| DX COPD                                          | Any prim or sec diagnosis - Chronic obstructive pulmonary disease, prior 2 years | Prior 1 to 730 days (inclusive)    |
| DX Mental                                        | Any prim or sec diagnosis - Mental illness, prior 2 years                        | Prior 1 to 730 days (inclusive)    |
| DX Asthma                                        | Any prim or sec diagnosis - Asthma, prior 2 years                                | Prior 1 to 730 days (inclusive)    |
| DX Cognitive Impairment                          | Any prim or sec diagnosis - Miscellaneous cognitive dysfunctions, prior 2 years  | Prior 1 to 730 days (inclusive)    |
| DX ACS Condition                                 | Any prim or sec diagnosis - ACS: Any ambulatory care sensitive condition         | Prior 1 to 730 days (inclusive)    |
| <b>SUS AE variables</b>                          |                                                                                  |                                    |
| AE visits prior 0-90 days                        | Number of A&E visits (any) prior 1-90 days                                       | Prior 1 to 90 days (inclusive)     |
| AE unplanned follow-up visits prior 0-90 days    | Number of A&E visits - unplanned follow-up prior 1-90 days                       | Prior 1 to 90 days (inclusive)     |
| AE X-ray prior 0-90 days                         | Number of A&E visits with X-ray prior 1-90 days                                  | Prior 1 to 90 days (inclusive)     |
| AE visits prior 91-180 days                      | Number of A&E visits (any) prior 91-180 days                                     | Prior 91 to 180 days (inclusive)   |
| AE unplanned follow-up visits prior 91-180 days  | Number of A&E visits - unplanned follow-up prior 91-180 days                     | Prior 91 to 180 days (inclusive)   |
| AE X-ray prior 91-180 days                       | Number of A&E visits with X-ray prior 91-180 days                                | Prior 91 to 180 days (inclusive)   |
| AE visits prior 181-365 days                     | Number of A&E visits (any) prior 181-365 days                                    | Prior 91 to 180 days (inclusive)   |
| AE unplanned follow-up visits prior 181-365 days | Number of A&E visits - unplanned follow-up prior 181-365 days                    | Prior 181 to 365 days (inclusive)  |
| AE X-ray prior 181-365 days                      | Number of A&E visits with X-ray prior 181-365 days                               | Prior 181 to 365 days (inclusive)  |
| AE visits 2 yrs prior                            | Number of A&E visits (any) prior 366-730 days                                    | Prior 366 to 730 days (inclusive)  |
| AE unplanned follow-up visits 2 yrs              | Number of A&E visits - unplanned follow-up prior                                 | Prior 366 to 730 days (inclusive)  |

|    |                                                         |                                                                         |                                   |
|----|---------------------------------------------------------|-------------------------------------------------------------------------|-----------------------------------|
| 1  | prior<br>AE X-ray 2yrs prior                            | 366-730 days<br>Number of A&E visits with X-ray prior 366-730 days      | Prior 366 to 730 days (inclusive) |
| 2  | <b>SUS outpatient variables</b>                         |                                                                         |                                   |
| 3  | Outpatient specialty visits prior 0-90 days             | Number of outpatient visits (all) prior 1-90 days                       | Prior 1 to 90 days (inclusive)    |
| 4  | Outpatient specialty visits missed prior 0-90 days      | Number of outpatient visits missed prior 1-90 days                      | Prior 1 to 90 days (inclusive)    |
| 5  | Outpatient specialty visits prior 91-180 days           | Number of outpatient visits (all) prior 91-180 days                     | Prior 91 to 180 days (inclusive)  |
| 6  | Outpatient specialty visits missed prior 91-180 days    | Number of outpatient visits missed prior 91-180 days                    | Prior 91 to 180 days (inclusive)  |
| 7  | Outpatient specialty visits prior 181-365 days          | Number of outpatient visits (all) prior 181-365 days                    | Prior 181 to 365 days (inclusive) |
| 8  | Outpatient specialty visits missed prior 181-365 days   | Number of outpatient visits missed prior 181-365 days                   | Prior 181 to 365 days (inclusive) |
| 9  | Outpatient specialty visits 2 yrs prior                 | Number of outpatient visits (all) prior 365-730 days                    | Prior 366 to 730 days (inclusive) |
| 10 | Outpatient specialty visits missed 2 yrs prior          | Number of outpatient visits missed prior 365-730 days                   | Prior 366 to 730 days (inclusive) |
| 11 | <b>GP consultations data</b>                            |                                                                         |                                   |
| 12 | GP DX COPD                                              | Diagnosis of COPD, prior 2 years                                        | Prior 1 to 730 days (inclusive)   |
| 13 | GP - 1 long term condition                              | Chronic conditions - 1 in prior 2 years                                 | Prior 1 to 730 days (inclusive)   |
| 14 | GP - 2 or more long term conditions                     | Chronic conditions - 2 or more in prior 2 years                         | Prior 1 to 730 days (inclusive)   |
| 15 | GP - Glomerular filtration rate group 3 last 0-365 days | Glomerular Filtration Rate Group 3 in last year                         | Prior 1 to 365 days (inclusive)   |
| 16 | GP - 10+ unique drugs prescribed                        | 1-4 unique drugs - last 1 to 90 days                                    | Prior 1 to 90 days (inclusive)    |
| 17 | GP - 5-9 unique drugs prescribed                        | 5-9 unique drugs - last 1 to 90 days                                    | Prior 1 to 90 days (inclusive)    |
| 18 | GP - 0-4 unique drugs prescribed                        | 10+ unique drugs - last 1 to 90 days                                    | Prior 1 to 90 days (inclusive)    |
| 19 | GP - Psychoactive substance misuse disorder             | Psychoactive substance misuse disorder, prior 2 years                   | Prior 1 to 730 days (inclusive)   |
| 20 | GP - 7+ distinct disorders                              | 7+ distinct disease disorders recorded in prior 90 days                 | Prior 1 to 90 days (inclusive)    |
| 21 | GP - GP visits prior 0-3 months                         | Count of different BNF chapters of prescribed medicines, prior 2 years  | Prior 1 to 730 days (inclusive)   |
| 22 | GP - GP visits prior 4-6 months                         | Number of GP visits prior 1-3 months                                    | Prior 1 to 3 months (inclusive)   |
| 23 | GP - GP visits prior 7-12 months                        | Number of GP visits prior 13-24 months                                  | Prior 13 to 24 months (inclusive) |
| 24 | GP - GP visits 2yrs prior                               | Number of GP visits prior 4-6 months                                    | Prior 4 to 6 months (inclusive)   |
| 25 | GP - Increasing rate of GP visits during last 12 months | Number of GP visits prior 7-12 months                                   | Prior 7 to 12 months (inclusive)  |
| 26 | GP - Number of high risk BNFs                           | Substantial increase in GP visits last year                             |                                   |
| 27 | GP - Any high risk                                      | Number of BNF codes associated with emergency admissions, prior 2 years | Prior 1 to 730 days (inclusive)   |
| 28 | GP - Count of BNF chapters                              | Any BNF codes associated with emergency admissions, prior 2 years       | Prior 1 to 730 days (inclusive)   |
| 29 | GP - DX Dementia                                        | Diagnosis of Dementia, prior 2 years                                    | Prior 1 to 730 days (inclusive)   |
| 30 | GP - Exception reported from quality indicators         | QOF register exceptions, prior 2 years                                  | Prior 1 to 730 days (inclusive)   |
| 31 | GP - Health visitor or district nurse visit             | Any home/district visit, prior 2 years                                  | Prior 1 to 730 days (inclusive)   |
| 32 | GP - Record of IHD/angina                               | Diagnosis of IHD/angina, prior 2 years                                  | Prior 1 to 730 days (inclusive)   |
| 33 | GP - Nebuliser used                                     | Nebuliser prescribed, prior 2 years                                     | Prior 1 to 730 days (inclusive)   |
| 34 | GP - Salbutamol prescribed                              | Salbutamol prescribed, prior 2 years                                    | Prior 1 to 730 days (inclusive)   |
| 35 | GP - Warfarin prescribed                                | Warfarin prescribed, prior 2 years                                      | Prior 1 to 730 days (inclusive)   |
| 36 | GP - High blood pressure                                | High blood pressure Read code, prior 2 years                            | Prior 1 to 730 days (inclusive)   |
| 37 | GP - Smoker                                             | Smoking status, prior 2 years                                           | Prior 1 to 730 days (inclusive)   |
| 38 | GP - BMI 30+                                            | BMI greater than equal to 30, prior 2 years                             | Prior 1 to 730 days (inclusive)   |
| 39 | GP - HbA1c > 10                                         | HbA1c greater than 10, prior 2 years                                    | Prior 1 to 730 days (inclusive)   |
| 40 | GD - QOF ARTF                                           | QOF register: Atrial fibrillation                                       | Prior 1 to 730 days (inclusive)   |
| 41 | GP - QOF CKD                                            | QOF register: Stage 3 to 5 chronic kidney disease                       | Prior 1 to 730 days (inclusive)   |
| 42 | GP - QOF Depression                                     | QOF register: Depression                                                | Prior 1 to 730 days (inclusive)   |
| 43 | GP - Number of QOF DX categories 3+                     | QOF register: number of different registers, 3 or more                  | Prior 1 to 730 days (inclusive)   |
| 44 | GP - Number of phone contacts last 0-3 months           | Number of GP telephone consults prior 1-3 months                        | Prior 1 to 3 months (inclusive)   |

1  
2  
3  
4  
5  
6  
7  
8  
9 **Choosing a model to predict hospital admission. An observational study of new variants of predictive**  
10 **models for case finding.**  
11  
12  
13  
14  
15  
16

17 John Billings, Associate Professor (1)  
18 | Theo Georghiou, Senior Research Analyst (2)  
19 Ian Blunt, Senior Research Analyst (2)  
20 Martin Bardsley, Director of Research (2)  
21  
22

23 <sup>1</sup>Robert F. Wagner Graduate School of Public Service, New York University, 295 Lafayette Street, Room  
24 3010, New York, NY 10012-9604, USA

25 <sup>2</sup>Nuffield Trust, 59 New Cavendish Street, London W1G 7LP, UK  
26  
27

28 **Corresponding Author** theo.georghiou@nuffieldtrust.org.uk  
29  
30  
31  
32  
33

34 **Key words:**

35  
36 Predictive Risk, Urgent care, Hospital admission  
37  
38  
39  
40

41 Word count: 4,090  
42  
43  
44  
45  
46  
47  
48  
49  
50  
51  
52  
53  
54



**ABSTRACT**

**Objectives:** To test the performance of new variants of models to identify people at risk of an emergency hospital admission. We compared (1) the impact of using alternative data sources (hospital inpatient, A&E, outpatient, and GP electronic medical records) (2) the effects of local calibration on the performance of the models and (3) the choice of population denominators.

**Design:** Multivariate logistic regressions using person level data adding each data set sequentially to test value of additional variables and denominators.

**Setting:** Five Primary Care Trusts within England.

**Participants:** 1,836,099 people aged 18-95 registered with GPs on 31 July 2009.

**Main outcome measures:** Models to predict hospital admission and readmission were compared in terms of positive predictive value and sensitivity for various risk strata and with receiver operating curve C statistic.

**Results:** The addition of each data set showed moderate improvement in number of patients identified with little or no loss of positive predictive value. However, even with inclusion of GP electronic medical record information, the algorithms identified only a small number of patients with no emergency hospital admissions in the prior two years. The model pooled across all sites performed almost as well as models calibrated to local data from just one site. Using population denominators from GP registers led to better case finding.

**Conclusions:** These models provide a basis for wider application in the NHS. Each of the models examined produce reasonably robust performance and offers some predictive value. The addition of more complex data add some value, but we were unable to conclude that pooled models performed less well than those in individual sites. Choices about model should be linked to the intervention design. Characteristics of patients identified by the algorithms provide useful information in the design/costing of intervention strategies to improve care coordination/outcomes for these patients.

**Article focus**

- The use of statistical models to predict risk of hospital admissions are increasingly used to prioritise patients for preventive care. Models exist in several different forms and use a variety of input data sets.
- This paper compared the performance of a variety of models built using different datasets.

**Key messages**

- The addition of more detailed data sets led to moderate improvement in number of patients identified with little or no loss of positive predictive value.
- The use of GP registry data for the denominator proved to be of significant importance. By including all patients in an area, not just those with prior hospital use, improved rates of case finding were observed.
- Models calibrated to local data sets did not show a consistent improvement over models built on pooled data.

**Strengths and limitations of this study**

- The analysis is based on populations from only five areas in England, however this is the largest UK population (1.8M people) used in the development of a publicly available risk tool.
- The success of a predictive model depends on many factors beyond the statistical performance of the model.

1  
2  
3  
4  
5  
6  
7  
8  
9  
10  
11  
12  
13  
14  
15  
16  
17  
18  
19  
20  
21  
22  
23  
24  
25  
26  
27  
28  
29  
30  
31  
32  
33  
34  
35  
36  
37  
38  
39  
40  
41  
42  
43  
44  
45  
46  
47  
48  
49  
50  
51  
52  
53  
54  
55  
56  
57  
58  
59  
60

## INTRODUCTION

There remains continuing interest in identifying patients at risk of future hospital admissions. Policies providing penalties[1] or non-payment[2] for hospital readmissions that put providers at risk for a share of total health expenditures have been developed for in the U.S. and in England. These create even stronger incentives to identify high risk patients to target care coordination and management strategies that may potentially reduce future inpatient expenditures.

Most predictive modelling approaches have used administrative data from claims in the U.S. or hospital data from Hospital Episode Statistics (HES) or Secondary Uses Services (SUS) in England. These data provide the information on prior utilisation and diagnostic history to develop predictive models for patients at risk of future hospitalization.[3] Payor claims data in the U.S. provide rich information on care provided in hospitals, home care services and nursing home use, as well as detailed pharmacy prescription history.[4] In England, the most commonly used models (such as in the now outdated Patient at Risk of Readmission PARR algorithm)[5,6] are based on hospital admissions data (including day case use, and regular attendances) with some use of accident and emergency (A&E) and outpatient attendance data as well.[7]

While some predictive modeling efforts in the U.K. have included information from GP electronic medical records (EMRs),[8,9] using such data presents a number of challenges. These include obtaining permissions for access to EMRs for large populations, linking the records to hospital data, and use of Read codes[10] to develop GP variables. Data from EMRs include additional elements not available in the hospital data sets such as test results (e.g. blood pressure, HbA1c levels), diagnostic history for patients without recent inpatient admissions, prescription history, GP contact patterns (GP visits and telephone contacts), and other personal health markers (e.g. body mass index, smoking status). These additional data elements have the potential to add power to predictive modeling efforts, especially for patients with no or lower levels of recent inpatient use.

Despite the challenges, a number of initiatives around the UK are demonstrating population wide access to EMR data. A common application is in the use of models that assist local clinical commissioning groups (CCGs) in identifying high risk patients.

1  
2  
3  
4  
5  
6  
7  
8  
9  
10  
11  
12  
13  
14  
15  
16  
17  
18  
19  
20  
21  
22  
23  
24  
25  
26  
27  
28  
29  
30  
31  
32  
33  
34  
35  
36  
37  
38  
39  
40  
41  
42  
43  
44  
45  
46  
47  
48  
49  
50  
51  
52  
53  
54  
55  
56  
57  
58  
59  
60

Though the choice of data sets for a predictive model makes a big difference to the investment required to run these models – at least initially – no studies have looked at the marginal value of different data sets. In this analysis we examine the added value of including data on A&E and outpatient visits (which are readily available) to predictive modeling efforts using hospital inpatient data alone. We also assess the marginal effect of adding GP EMR information to help identify patients at risk of future hospital admissions. Most existing models in use were developed using logistic regression techniques and we used this standard approach throughout this paper. We recognize that different modelling methods may yield different results but in this analysis we were concerned with the impact of changes in the underlying data sets. Such models will always be limited by the scope and quality of data available, the ways data are grouped and classified and the ways that users can assess up to date information. Despite these problems these models have become commonly used tools.

In addition to the depth of data used there is also a question about how generalisable models are across different sites. In many settings models are recalibrated on local data sets. Yet there is little systematic analysis of the value that this step adds and whether models built on data from one site outperform those built on a larger sample of pooled data. We therefore explore whether there is a need for development of individual site predictive models, or whether models developed from multiple sites can be applied effectively at a new individual site.

## METHODS

We conducted analyses separately for five Primary Care Trust areas in England (Newham, Cornwall, Kent, Croydon, Redbridge; total adult population ranging from 209,661 to 693,089). Results are reported for the individual sites and as combined/pooled results (total population 1,836,099). Hospital data was extracted from the Secondary Users Services (SUS)[11] system which contained records of all hospital events (inpatient admissions, outpatient appointments and A&E visits) for the PCTs' registered populations between 1 August 2007 and 30 September 2010. The PCTs also extracted data from GP systems in two forms. Firstly as a register of the local adult population from 1 August 2007 and 31 July 2009, and secondly in the form of datasets recording details of GP consultations over the same time period.

Personally identifiable information was stripped out before any data were passed to the research team.

Individuals' NHS numbers (the personal identifiers) were concatenated with a passcode chosen by each of the five PCT areas (and unknown to the research team) and these were pseudonymised at source using secure hash algorithm SHA-256 [12]. This ~~to~~ allowed for linkage between the hospital and the general practice data from each area, whilst preserving individuals' anonymity.

A series of variables were created from each data set that were believed to be potentially predictive of an unplanned (emergency) hospital admission in the last 12 months of the study period. These variables captured resource use, utilization patterns, diagnostic history, test results, and prescription history in the two years prior to the predictive period. They were created for all individuals aged 18+ registered with a GP in one of the five areas on 31 July 2009. To account for expected time required to obtain and process the hospital and GP EMR data, we included a two-month lag in our analyses, with data from 1 August 2007 to 31 July 2009 used to predict emergency admissions during the period 1 October 2009 to 30 September 2010.

Patient age and gender were obtained from the GP register. Patient area of residence was not available, and so GP practice attributed index of multiple deprivation (2007) was used as an area deprivation measure. The number of months the patient was registered with the PCT in the pre-period was calculated and included in the regression. Hospital inpatient data were used to capture utilization in the 0-90, 91-181, 180-365, and 366-730 days prior to the lag period. The number of emergency and elective admissions for these periods were included and dichotomous variables for any day case or regular attendance use were created.

1  
2  
3  
4  
5  
6  
7  
8  
9 A broad range of diagnostic variables were developed using primary and secondary diagnosis fields and  
10 a Charlson Comorbidity Index<sup>[4213]</sup> was calculated for each patient and included in the model.  
11

12 A&E data were used to determine A&E visit rates for various intervals in the pre-period, both total visits  
13 and unplanned follow-up visits. A&E diagnostic information was not reliably reported across the five  
14 sites and was not included, although X-ray use was included. Outpatient data provided variables on  
15 outpatient visit rates for various intervals, as well as missed appointment rates and the number of  
16 different specialty types consulted. Diagnostic information in outpatient data was missing in more than  
17 95% of cases and was not included.  
18  
19

20  
21 GP EMR data were used to create proxy visit rates (these may include both actual GP visits, in addition  
22 to other events documented in a person's records) for various intervals and to capture any increase in  
23 visit rates at the end of the pre-period that may reflect increased morbidity in a patient. EMR Read  
24 codes (CTV3 version) were used to obtain test results (blood pressure, blood serum levels, HbA1c levels,  
25 etc.), body mass index, smoking history, prescription history (number and type), and a range of  
26 diagnostic variables during the pre-period.  
27  
28  
29

30  
31 Variables from each data set (inpatient (including day case and regular attenders), A&E, outpatient, and  
32 GP EMRs) were added and modeled sequentially using standard logistic regression in SPSS v20.

33 Emergency admission in the next 12 months was used as the dependent variable, producing a risk score  
34 ranging from 0-100. Separate models were developed for each PCT area, and analysis was limited to  
35 patients aged 18-95 who were on the GP register in the area. Over-fitting was tested using a split  
36 sample approach, with only minor differences observed in positive predictive values (PPV), sensitivity,  
37 and specificity.  
38  
39

40  
41 Findings provided here include both individual site results and results combined across the five sites.

42 We also created five additional predictive models (referred to below as the 'four-site regression  
43 models'), each one combining data from four sites and applying coefficients to the fifth remaining site.

44 With this we could compare results with individual site predictive models to help assess the value of  
45 local model development.  
46  
47

48  
49 The full list of more than 300 potential variables was ultimately reduced to 88 by exclusion of variables  
50 with low volumes and low significance levels across the sites. The 88 variables ultimately included in the  
51 model (and regression coefficients), may be found in Appendix B [and D](#), and a full listing of the variables  
52

1  
2  
3  
4  
5  
6  
7  
8  
9  
10  
11  
12  
13  
14  
15  
16  
17  
18  
19  
20  
21  
22  
23  
24  
25  
26  
27  
28  
29  
30  
31  
32  
33  
34  
35  
36  
37  
38  
39  
40  
41  
42  
43  
44  
45  
46  
47  
48  
49  
50  
51  
52  
53  
54  
55  
56  
57  
58  
59  
60

considered for inclusion and detailed specification of each variable are available at

<http://www.nuffieldtrust.org.uk/>.

Cost variables were examined, with secondary care activity costed according to the method used in development of the person based formula for allocating commissioning funds to general practices in England.<sup>[13,14]</sup> Ultimately, these were not included in the predictive models because of concerns about difficulties in constructing these variables by possible future users, however costs are included in descriptive findings to help in design of intervention strategies.

Predictive modeling performance is typically documented reporting PPV and sensitivity at the risk score threshold of 50. However, because interventions may be targeted at patients with higher or lower risk scores and interventions strategies may be calibrated differently depending on risk level and characteristics of patients at various risk score levels, we report PPV sensitivity at 20 risk score cutoff points (vigintiles) and provide detailed patient characteristics at risk score thresholds of 50 and 30 to facilitate intervention design.

## RESULTS

### Pooled Individual Site Results

There were 1,836,099 people aged 18 and over who were registered with a GP practice on 31 July 2009.

Table 1 shows the combined results of individual site regressions including the number of patients correctly identified, PPV, and sensitivity for four models:

- (i) IP based on hospital inpatient data only (including day cases and regular attendances)
- (ii) IPAE using inpatient and A&E data
- (iii) IPAEOP using inpatient A&E and outpatient data
- (iv) IPAEOPGP using inpatient, A&E, outpatient data and GP EMR.

At the traditional risk score threshold level of 50 all four models perform respectably in terms of PPV (ranging from .523 to .538), but sensitivity remains quite low across all models (.049 to .060). Lowering the threshold to 30 increases sensitivity somewhat with a concomitant reduction in PPV (ranging from .417 to .422). The ROC area under the curve (C statistic) improved with the addition of each data set, increasing from .731 with the inpatient-only model to .780 with the full model.

**Table 1** Model performance, four models: IP, IPAE, IPAEOP, IPAEOPGP. Five site individual runs combined.

| Risk Score Threshold   | IP Data       |       |             | IP+AE Data    |       |             | IP+AE+OP Data |       |             | IP+AE+OP+GP Data |       |             |
|------------------------|---------------|-------|-------------|---------------|-------|-------------|---------------|-------|-------------|------------------|-------|-------------|
|                        | True Positive | PPV   | Sensitivity | True Positive | PPV   | Sensitivity | True Positive | PPV   | Sensitivity | True Positive    | PPV   | Sensitivity |
| 1                      | 94,692        | 0.052 | 1.000       | 94,692        | 0.052 | 1.000       | 94,692        | 0.052 | 1.000       | 94,692           | 0.052 | 1.000       |
| 5                      | 54,450        | 0.126 | 0.575       | 56,117        | 0.128 | 0.593       | 56,438        | 0.131 | 0.596       | 61,498           | 0.133 | 0.649       |
| 10                     | 33,053        | 0.219 | 0.349       | 34,102        | 0.221 | 0.360       | 35,033        | 0.223 | 0.370       | 39,986           | 0.220 | 0.422       |
| 15                     | 22,898        | 0.285 | 0.242       | 23,166        | 0.293 | 0.245       | 24,261        | 0.290 | 0.256       | 28,697           | 0.283 | 0.303       |
| 20                     | 16,181        | 0.346 | 0.171       | 16,915        | 0.347 | 0.179       | 17,719        | 0.344 | 0.187       | 21,601           | 0.333 | 0.228       |
| 25                     | 12,670        | 0.385 | 0.134       | 13,182        | 0.386 | 0.139       | 13,754        | 0.383 | 0.145       | 16,672           | 0.378 | 0.176       |
| 30                     | 10,061        | 0.421 | 0.106       | 10,555        | 0.422 | 0.111       | 11,010        | 0.419 | 0.116       | 13,196           | 0.417 | 0.139       |
| 35                     | 8,130         | 0.449 | 0.086       | 8,600         | 0.450 | 0.091       | 8,986         | 0.448 | 0.095       | 10,516           | 0.450 | 0.111       |
| 40                     | 6,700         | 0.477 | 0.071       | 7,139         | 0.478 | 0.075       | 7,421         | 0.476 | 0.078       | 8,494            | 0.479 | 0.090       |
| 45                     | 5,535         | 0.501 | 0.058       | 5,976         | 0.504 | 0.063       | 6,167         | 0.499 | 0.065       | 6,921            | 0.510 | 0.073       |
| 50                     | 4,627         | 0.529 | 0.049       | 5,027         | 0.531 | 0.053       | 5,172         | 0.523 | 0.055       | 5,669            | 0.538 | 0.060       |
| 55                     | 3,862         | 0.551 | 0.041       | 4,222         | 0.551 | 0.045       | 4,359         | 0.543 | 0.046       | 4,581            | 0.562 | 0.048       |
| 60                     | 3,239         | 0.574 | 0.034       | 3,555         | 0.569 | 0.038       | 3,658         | 0.567 | 0.039       | 3,735            | 0.587 | 0.039       |
| 65                     | 2,711         | 0.593 | 0.029       | 3,012         | 0.590 | 0.032       | 3,041         | 0.587 | 0.032       | 3,034            | 0.618 | 0.032       |
| 70                     | 2,245         | 0.617 | 0.024       | 2,481         | 0.612 | 0.026       | 2,519         | 0.610 | 0.027       | 2,453            | 0.645 | 0.026       |
| 75                     | 1,816         | 0.634 | 0.019       | 2,049         | 0.639 | 0.022       | 2,064         | 0.631 | 0.022       | 1,921            | 0.666 | 0.020       |
| 80                     | 1,418         | 0.666 | 0.015       | 1,662         | 0.656 | 0.018       | 1,646         | 0.654 | 0.017       | 1,478            | 0.696 | 0.016       |
| 85                     | 1,064         | 0.679 | 0.011       | 1,293         | 0.674 | 0.014       | 1,276         | 0.679 | 0.013       | 1,114            | 0.711 | 0.012       |
| 90                     | 769           | 0.710 | 0.008       | 932           | 0.688 | 0.010       | 935           | 0.702 | 0.010       | 754              | 0.738 | 0.008       |
| 95                     | 478           | 0.748 | 0.005       | 592           | 0.725 | 0.006       | 586           | 0.728 | 0.006       | 437              | 0.771 | 0.005       |
| Top 1%                 | 8,214         | 0.447 | 0.087       | 8,353         | 0.455 | 0.088       | 8,410         | 0.458 | 0.089       | 8,722            | 0.475 | 0.092       |
| Top 5%                 | 24,873        | 0.271 | 0.263       | 25,355        | 0.276 | 0.268       | 25,712        | 0.280 | 0.272       | 26,991           | 0.294 | 0.285       |
| <b>ROC C Statistic</b> |               | 0.731 |             | 0.745         |       | 0.752       |               | 0.780 |             |                  |       |             |



1  
2  
3  
4  
5  
6  
7  
8  
9  
10  
11  
12  
13  
14  
15  
16  
17  
18  
19  
20  
21  
22  
23  
24  
25  
26  
27  
28  
29  
30  
31  
32  
33  
34  
35  
36  
37  
38  
39  
40  
41  
42  
43  
44  
45  
46  
47  
48  
49  
50  
51  
52  
53  
54  
55  
56  
57  
58  
59  
60

Of particular note is the finding that the addition of each data set added power, that is, correctly identified more patients with an admission in the next 12 months, with only a minor reduction in PPV. At a risk threshold of 50, the addition of A&E data resulted in increase of 400 (8.6%) correctly flagged patients, with no loss in PPV. The inclusion of outpatient data added a more modest 2.9%, but with a slight loss in PPV (.531 to .523). The addition of GP EMR data added an additional 9.6% of patients, while actually increasing the accuracy of the model (PPV increasing from .523 to .538). The added power of the A&E data set is less substantial at a risk score threshold of 30 (4.9%), but outpatient and GP EMR data sets had larger increases in correctly identified patients (4.3% and 19.9%).

There were also important differences between the models in terms of the characteristics of patients identified as high risk. For example, at a risk score cutoff of 50, patients identified using inpatient data alone had high prior emergency inpatient utilization rates with 2.62 admissions in the prior year compared to 2.43 when A&E data was added; 2.34 with addition of outpatient, and 2.20 with the addition of GP EMR data - see Table 2.

The inclusion of the additional data sets also led to a reduction in observed morbidity level of patients at the 50 threshold, with lower numbers of long term conditions, fewer patients with multiple long term conditions, lower Charlson Comorbidity Index scores, less history of alcohol abuse and mental illness, and lower emergency inpatient costs in the years prior to the predictive period. Similar, but less substantial differences were observed at the risk score threshold of 30. The addition of the A&E data set resulted in higher rates of A&E visits in the pre-period among patients identified at both risk score cutoff levels, and the addition of outpatient data resulted in higher outpatient visit and missed visit rates among identified patients.

These findings suggest inclusion of the additional data sets added some predictive power and generally tended to find additional patients who were less severely ill. (more severely ill patients tended to remain high risk). Thus they potentially offer an opportunity for intervention at earlier stages in the progression of a patient's condition. However, the number of patients identified with no prior emergency inpatient utilization in the prior two years was relatively small across all models. At a risk score threshold of 50, only 0.3% of patients correctly identified by the inpatient-only model had no prior emergency admissions in the previous two years, and increasing only modestly 3.2% in the full model (Table 3). At a risk threshold of 30, the rates were higher, but only reaching 12.4% for the full model.

**Table 2** Patient characteristics by risk score threshold four models: IP, IPAE, IPAEOP, IPAEOPGP. Five site individual runs combined.

|                               | Risk Score 50+ |              |                |                  | Risk Score 30+ |              |                |                  |
|-------------------------------|----------------|--------------|----------------|------------------|----------------|--------------|----------------|------------------|
|                               | IP<br>Data     | IPAE<br>Data | IPAEOP<br>Data | IPAEOPGP<br>Data | IP<br>Data     | IPAE<br>Data | IPAEOP<br>Data | IPAEOPGP<br>Data |
| Number of patients            | 8,743          | 9,473        | 9,892          | 10,545           | 23,912         | 25,021       | 26,304         | 31,653           |
| Patients with adm next 12 mos | 4,627          | 5,027        | 5,172          | 5,669            | 10,062         | 10,554       | 11,011         | 13,196           |
| Mean Age                      | 73.9           | 72.3         | 71.2           | 72.2             | 75.3           | 74.0         | 73.4           | 73.9             |
| Age 18-39                     | 6.2%           | 8.4%         | 8.7%           | 7.8%             | 5.1%           | 6.8%         | 7.0%           | 6.4%             |
| Age 40-54                     | 8.7%           | 9.6%         | 10.9%          | 10.6%            | 7.0%           | 7.8%         | 8.6%           | 8.5%             |
| Age 55-64                     | 6.9%           | 7.4%         | 7.8%           | 8.1%             | 6.4%           | 6.4%         | 7.0%           | 7.3%             |
| Age 65-74                     | 14.4%          | 13.9%        | 15.0%          | 13.5%            | 13.9%          | 13.8%        | 14.4%          | 13.7%            |
| Age 75-84                     | 30.5%          | 28.9%        | 28.0%          | 27.4%            | 32.1%          | 31.1%        | 30.3%          | 29.6%            |
| Age 85+                       | 33.3%          | 31.8%        | 29.3%          | 32.6%            | 35.5%          | 34.1%        | 32.7%          | 34.4%            |
| Female                        | 55.2%          | 55.2%        | 54.9%          | 54.7%            | 56.9%          | 57.1%        | 56.6%          | 56.5%            |
| Practice IMD                  | 24.6           | 24.9         | 24.8           | 24.3             | 24.2           | 24.3         | 24.3           | 23.8             |
| Ischaemic Heart Disease       | 36.2%          | 34.2%        | 33.2%          | 32.1%            | 29.8%          | 28.4%        | 27.8%          | 25.2%            |
| Angina                        | 21.7%          | 20.5%        | 19.5%          | 19.3%            | 17.3%          | 16.4%        | 15.7%          | 14.5%            |
| Hypertension                  | 64.5%          | 61.2%        | 59.9%          | 59.0%            | 59.4%          | 56.7%        | 55.1%          | 50.9%            |
| CHF                           | 19.2%          | 17.8%        | 16.9%          | 15.9%            | 14.0%          | 13.2%        | 12.5%          | 10.7%            |
| CVD                           | 21.7%          | 20.1%        | 19.3%          | 18.1%            | 16.9%          | 15.8%        | 15.2%          | 13.3%            |
| COPD                          | 23.4%          | 21.4%        | 20.6%          | 19.1%            | 17.2%          | 16.3%        | 15.7%          | 13.4%            |
| Asthma                        | 21.3%          | 20.9%        | 20.1%          | 18.1%            | 17.4%          | 16.6%        | 16.1%          | 13.8%            |
| Diabetes                      | 34.1%          | 32.4%        | 31.6%          | 28.8%            | 30.1%          | 28.8%        | 27.6%          | 23.6%            |
| Renal Failure                 | 16.5%          | 14.6%        | 14.2%          | 13.3%            | 11.2%          | 10.4%        | 10.0%          | 8.5%             |
| Any long term conditions      | 89.8%          | 87.0%        | 85.8%          | 85.0%            | 86.6%          | 83.6%        | 81.4%          | 75.2%            |
| Any cancer                    | 15.4%          | 13.8%        | 13.4%          | 12.4%            | 13.3%          | 12.7%        | 12.2%          | 10.5%            |
| Alcohol misuse                | 10.0%          | 10.0%        | 9.6%           | 9.1%             | 7.0%           | 6.7%         | 6.4%           | 5.8%             |
| Mental illness                | 32.0%          | 30.6%        | 28.9%          | 27.2%            | 23.5%          | 22.3%        | 21.3%          | 18.6%            |
| Number long term conditions   | 2.67           | 2.51         | 2.43           | 2.31             | 2.20           | 2.10         | 2.02           | 1.79             |
| Charlson Index                | 3.96           | 3.69         | 3.55           | 3.28             | 3.09           | 2.95         | 2.82           | 2.43             |
| Emerg adms 1yr prior          | 2.62           | 2.43         | 2.34           | 2.20             | 1.64           | 1.57         | 1.50           | 1.29             |
| Emerg adms 2 yr prior         | 1.78           | 1.67         | 1.61           | 1.50             | 1.15           | 1.10         | 1.05           | 0.91             |
| No emerg adm prior 2 yrs      | 0.6%           | 1.9%         | 3.3%           | 4.3%             | 4.2%           | 6.5%         | 9.2%           | 16.2%            |
| Elect adms 1yr prior          | 0.32           | 0.29         | 0.31           | 0.28             | 0.27           | 0.26         | 0.27           | 0.24             |
| Elect adms 2 yr prior         | 0.24           | 0.23         | 0.26           | 0.24             | 0.20           | 0.20         | 0.22           | 0.19             |
| Any day case 1yr prior        | 31.9%          | 30.8%        | 31.6%          | 28.7%            | 31.5%          | 30.7%        | 30.4%          | 26.9%            |
| Any day case 2yr prior        | 28.9%          | 27.6%        | 28.0%          | 25.7%            | 27.8%          | 26.9%        | 26.7%          | 23.7%            |
| Emerg adm cost 1yr prior      | £4,500         | £4,073       | £3,920         | £3,688           | £2,893         | £2,709       | £2,604         | £2,231           |
| Emerg adm cost 2yr prior      | £2,932         | £2,675       | £2,583         | £2,422           | £1,962         | £1,822       | £1,757         | £1,521           |
| AE visits 1yr prior           | 2.90           | 3.59         | 3.45           | 3.17             | 1.83           | 2.26         | 2.17           | 1.86             |
| AE visits 2yr prior           | 1.90           | 2.40         | 2.31           | 2.10             | 1.23           | 1.52         | 1.46           | 1.25             |
| OP visits 1yr prior           | 7.27           | 6.94         | 9.65           | 8.23             | 5.65           | 5.63         | 7.39           | 6.16             |
| OP visits 2yr prior           | 4.30           | 4.10         | 5.92           | 5.08             | 3.39           | 3.38         | 4.54           | 3.81             |
| OP visits missed 1yr prior    | 0.47           | 0.48         | 0.74           | 0.65             | 0.35           | 0.36         | 0.53           | 0.44             |
| OP visits missed 2yr prior    | 0.49           | 0.48         | 0.71           | 0.61             | 0.33           | 0.34         | 0.48           | 0.40             |
| GP visits 1yr prior           | 42.9           | 42.7         | 43.3           | 52.5             | 38.5           | 38.4         | 38.8           | 45.4             |
| GP visits 2yr prior           | 35.5           | 35.2         | 35.7           | 42.5             | 32.4           | 32.1         | 32.5           | 37.7             |
| Any high risk BNFs            | 73.9%          | 71.6%        | 72.2%          | 84.0%            | 69.3%          | 67.5%        | 68.1%          | 79.8%            |
| Num high risk BNFs            | 1.94           | 1.85         | 1.88           | 2.20             | 1.64           | 1.59         | 1.61           | 1.84             |
| High blood pressure           | 9.0%           | 9.0%         | 9.0%           | 9.0%             | 10.0%          | 10.0%        | 10.0%          | 9.0%             |
| Smoker                        | 18.0%          | 19.0%        | 19.0%          | 23.0%            | 16.0%          | 16.0%        | 16.0%          | 20.0%            |
| BMI 30+                       | 16.0%          | 17.0%        | 17.0%          | 17.0%            | 15.0%          | 16.0%        | 16.0%          | 18.0%            |
| HbA1c > 10                    | 5.0%           | 5.0%         | 5.0%           | 7.0%             | 5.0%           | 5.0%         | 4.0%           | 6.0%             |
| Any Em adm next 12 mos        | 52.9%          | 53.1%        | 52.3%          | 53.8%            | 42.1%          | 42.2%        | 41.9%          | 41.7%            |
| Num Em adm next 12 mos        | 1.34           | 1.33         | 1.29           | 1.31             | 0.89           | 0.89         | 0.87           | 0.84             |
| 0 Em adm next 12 mos          | 47.1%          | 46.9%        | 47.7%          | 46.2%            | 57.9%          | 57.8%        | 58.1%          | 58.3%            |
| 1 Em adm next 12 mos          | 23.0%          | 23.0%        | 23.2%          | 23.9%            | 21.7%          | 21.9%        | 21.7%          | 22.3%            |
| 2 Em adm next 12 mos          | 12.5%          | 12.5%        | 12.3%          | 13.2%            | 10.0%          | 10.0%        | 10.0%          | 9.9%             |
| 3 Em adm next 12 mos          | 7.3%           | 7.3%         | 7.0%           | 7.1%             | 4.8%           | 4.9%         | 4.8%           | 4.6%             |
| 4+ Em adm next 12 mos         | 10.2%          | 10.2%        | 9.8%           | 9.7%             | 5.5%           | 5.5%         | 5.3%           | 4.9%             |
| Emerg adm cost next 12 mos    | £2,358         | £2,266       | £2,199         | £2,270           | £1,608         | £1,575       | £1,546         | £1,507           |

AE visits next 12 mos 1.88 2.11 2.04 2.04 1.24 1.37 1.36 1.29

**Table 3** Proportion of patients correctly identified, who had no emergency admissions in the prior two years. Four models: IP, IPAE, IPAEOP, IPAEOPGP. Five site individual runs combined.

| Prediction threshold | IP Data | IPAE Data | IPAEOP Data | IPAEOPGP Data |
|----------------------|---------|-----------|-------------|---------------|
| Risk Score 50+       | 0.3%    | 1.2%      | 2.3%        | 3.2%          |
| Risk Score 30+       | 2.7%    | 4.4%      | 6.3%        | 12.4%         |
| Top 1%               | 1.5%    | 2.9%      | 4.2%        | 6.5%          |
| Top 5%               | 25.9%   | 26.4%     | 26.7%       | 30.8%         |

#### Individual Site and 'Four-Site Regression' Model Results

Overall the performance of the models was similar at the individual site level. Only modest differences were found in PPV levels and sensitivity across the sites. For runs using non-GP data only (IPAEOP), at the risk score threshold of 50, PPVs ranged from .512 to .552 and sensitivity ranged from .047 to .071. For the model including GP EMRs, PPVs ranged from .521 to .566 and sensitivity from .053 to .073. See Appendix A. There was some variation in the magnitude of regression coefficients between sites, but in general the coefficients were comparable for models based on the non-GP data model (IPAEOP). See Appendix B. For the model including variables from GP EMRs (IPAEOPGP), the level of variation in regression coefficients (size and direction) was somewhat greater for those variables derived from GP data. We observed substantial differences in frequency of reporting of Read codes across sites which no doubt contributed to this variation. The level of significance of individual variables also varied across sites (Appendix C), but most variables were consistently strongly significant across all sites, especially variables involving prior emergency inpatient admissions. Again, higher levels of variation in levels of significance were observed for the GP variables derived from Read codes.

We compared the results for these individual site models to a pooled model combining data from four of the sites and applied coefficients to the remaining individual site. We found generally only small differences in predictive accuracy (PPV) between these two approaches (Table 4), however the individual site models identified a greater number of true positives. For example, in Cornwall at a risk

score cutoff of 50, the individual site model using hospital data identified correctly 1,041 patients while the pooled model identified only 754. In Newham however, the four-site model was more powerful, correctly identifying 858 patients compared to 734 for the individual site approach. In both cases (and in general across all sites), the model identifying larger numbers of true positives had a somewhat lower PPV, suggesting improved case finding volume came at the expense of predictive accuracy.

**Table 4** Individual site and four-site regression models. Case finding and predictive accuracy.

|                  | IPOP AE                    |       |                      |       | IPOP AEGP                  |       |                      |       |
|------------------|----------------------------|-------|----------------------|-------|----------------------------|-------|----------------------|-------|
|                  | Individual Site Regression |       | Four Site Regression |       | Individual Site Regression |       | Four Site Regression |       |
|                  | True Positives             | PPV   | True Positives       | PPV   | True Positives             | PPV   | True Positives       | PPV   |
| <b>Newham</b>    |                            |       |                      |       |                            |       |                      |       |
| Risk Score 50+   | 734                        | 0.552 | 858                  | 0.517 | 768                        | 0.566 | 835                  | 0.523 |
| Risk Score 30+   | 1,409                      | 0.450 | 1,564                | 0.414 | 1,570                      | 0.439 | 1,798                | 0.409 |
| <b>Cornwall</b>  |                            |       |                      |       |                            |       |                      |       |
| Risk Score 50+   | 1,041                      | 0.520 | 754                  | 0.548 | 1,176                      | 0.545 | 952                  | 0.556 |
| Risk Score 30+   | 2,439                      | 0.406 | 1,970                | 0.426 | 3,032                      | 0.410 | 2,746                | 0.411 |
| <b>Kent</b>      |                            |       |                      |       |                            |       |                      |       |
| Risk Score 50+   | 1,565                      | 0.513 | 1,387                | 0.519 | 1,736                      | 0.521 | 1,873                | 0.493 |
| Risk Score 30+   | 3,372                      | 0.401 | 3,067                | 0.403 | 4,079                      | 0.397 | 4,432                | 0.369 |
| <b>Croydon</b>   |                            |       |                      |       |                            |       |                      |       |
| Risk Score 50+   | 1,089                      | 0.528 | 1,192                | 0.523 | 1,182                      | 0.550 | 1,230                | 0.537 |
| Risk Score 30+   | 2,134                      | 0.444 | 2,258                | 0.424 | 2,610                      | 0.442 | 2,502                | 0.437 |
| <b>Redbridge</b> |                            |       |                      |       |                            |       |                      |       |
| Risk Score 50+   | 743                        | 0.512 | 863                  | 0.495 | 807                        | 0.522 | 607                  | 0.519 |
| Risk Score 30+   | 1,656                      | 0.420 | 1,693                | 0.415 | 1,905                      | 0.423 | 1,390                | 0.436 |

#### Testing alternative population denominators

Models built using inpatient data only (IP) were also built for just the subset of patients who had some inpatient care in the prior two years (to reflect typical predictive modeling efforts that may have been conducted without access to GP registry information), as well as for the group who had had an emergency admission in the prior year (to replicate analyses conducted by PARR users).

1  
2  
3  
4  
5  
6  
7  
8  
9  
10  
11  
12  
13  
14  
15  
16  
17  
18  
19  
20  
21  
22  
23  
24  
25  
26  
27  
28  
29  
30  
31  
32  
33  
34  
35  
36  
37  
38  
39  
40  
41  
42  
43  
44  
45  
46  
47  
48  
49  
50  
51  
52  
53  
54  
55  
56  
57  
58  
59  
60

Combining the results from the five sites at a risk score threshold of 50, models using [the full GP register list denominator](#) correctly identified 4,627 patients compared with 3,572 patients in runs restricted to patients with prior inpatient care and 3,060 to runs limited to patients with an emergency admission in the prior year. This substantial increase in case finding was obtained with only moderate loss in PPV (.529 GP list, .559 prior inpatient and .589 emergency admissions in last year). Similar results were also found for all hospital data models (IPOPAE, though with any hospital use in prior two years, rather than just any inpatient use).

Using the full GP registry population did not result in finding substantial numbers of patients with no emergency admissions in the prior two years, but the increased numbers of patients identified included more patients with less prior use and lower levels of morbidity. For a profile of patients identified using these alternative denominators see <http://www.nuffieldtrust.org.uk/>.

## DISCUSSION

This analysis has looked at the performance of new variants of predictive models for case finding. These models are intended to update and improve upon the established combined predictive model-like [\[4,15\]](#) and PARR models [\[5\]](#) widely used in the NHS.

Each of the models examined produced reasonably robust performance, [by some measures better or at least comparable to similar prior models \[9\]](#). At a risk threshold of 50, patients identified by the models had PPVs ranging from .523 to .538. While the percent of all patients with future admissions identified was relatively low (sensitivity .049 to .060), lowering the risk threshold allows the identification of more patients with relatively small loss in PPV (e.g. at a risk threshold of 30, the full model identified 14% of future admissions with a PPV of .417). Users of predictive modeling algorithms have obvious trade-offs between maximizing the number of patients identified and predictive accuracy. Lower risk score thresholds will find more patients, but these patients are increasingly less likely to have future admissions.

The implications for intervention design are important. Patients at lower risk thresholds have less prior inpatient use and lower morbidity, so an intervention here might be calibrated to be less intensive. But because the models are less accurate at lower risk scores, the amount that can be spent on an intervention is also reduced if you wish to achieve financial break-even (ie where the cost of intervention is off-set by cost savings from reduction in future admissions). As documented in Table 2,

1  
2  
3  
4  
5  
6  
7  
8  
9 at a risk score threshold of 50, the rate of future admission for patients identified by the full model  
10 (IPAEOPGP data) was 1.31 admissions per year with an associated cost of £2,270. If there were a 10%  
11 reduction in future admissions, £227 could be spent on an intervention to improve care coordination  
12 and still achieve break-even. However, at a lower risk threshold of 30, the lower rates of future  
13 admissions and costs means that lower intervention expenditures are required to achieve break-even  
14 (£151 with a 10% reduction in future admissions). A detailed business case analysis with mean  
15 emergency inpatient costs in the next 12 months within each risk vigintile level is available via  
16 <http://www.nuffieldtrust.org.uk/>.  
17  
18  
19

20  
21 These data also provide other information that may be useful in the development of intervention  
22 strategies. As shown in Table 2, patients identified by the models have extremely high rates of chronic  
23 disease (85-90% with long term conditions at risk threshold of 50), often with multiple long term  
24 conditions and high Charlson Comorbidity Index levels, indicating serious medical needs. However,  
25 these patients already have high use of outpatient care and very high GP visit rates. This suggests simple  
26 access to ambulatory care is not the issue, but prevention needs to look at care coordination and  
27 management of complex problems and at the ability of patients and their families to manage chronic  
28 illness. High risk patients identified by the models also have relatively high rates of mental illness (27-  
29 32% at risk threshold of 50) and moderate levels of alcohol abuse, factors that are likely to complicate  
30 any intervention strategy.  
31  
32  
33  
34  
35  
36

37  
38 It is also important to note the limitations of these data in helping frame the design of any intervention  
39 strategy. Other studies have documented that high risk patients often have important characteristics  
40 related to care needs and patient capacity not captured by administrative data and EMRs. For example,  
41 interviews with high risk patients and their families have documented high levels of social isolation for  
42 many, as well as precarious housing status.<sup>[4516]</sup> These non-medical factors are likely to have  
43 significant impact on health status and utilization patterns. Moreover, not much is known about  
44 how/whether care coordination and management has actually failed for these patients. Are these high  
45 risk patients just very sick patients whose hospitalizations are largely not preventable/avoidable <sup>[17]</sup>, or  
46 has the care delivery system failed in some important dimensions that can be corrected with improved  
47 care coordination and management? These data cannot answer this very critical question, and it is clear  
48 that the field would benefit from further study that examined the circumstances of patients identified as  
49  
50  
51  
52

1  
2  
3  
4  
5  
6  
7  
8  
9 high risk by predictive modeling algorithms to sort out more clearly the factors contributing to high rates  
10 of emergency admission.

11  
12 This study does document the value of incorporating data sets beyond inpatient records. The addition  
13 of A&E and outpatient records resulted in identification of more high risk patients with little or no loss of  
14 predictive accuracy. These data sets are readily available and have standardized reporting formats that  
15 facilitate analysis. While the absence of useful diagnostic information in these data sets is a limiting  
16 factor, the improvement in case finding and usefulness in descriptive profiling of high risk patients to  
17 help in intervention design (e.g. high rates of A&E use rates, high rates of missed outpatient  
18 appointments) suggests their inclusion is clearly merited.

19  
20 Use of GP EMRs presents significant challenges. While the lack of access to these data is unlikely to  
21 remain a problem, the variation in completeness and quality of data is problematic. The use of the  
22 unwieldy Read codes system makes analysis difficult, and we observed significant differences across  
23 sites in reporting patterns. Some of these differences may be caused by under reporting of diagnostic  
24 variables, others by differences in coding approaches. However, the potential improvement in case  
25 finding, especially among patients with lower rates of utilization in the pre-period, suggests these  
26 barriers are worth confronting. Our development of new variables beyond those included in prior  
27 predictive modeling efforts [8] contributed substantially to enhanced case finding, and further work on  
28 variable development is likely to lead to further improvements. Again, these data are also useful in  
29 providing descriptive information on high risk patients to help in intervention design (e.g. documenting  
30 potential targets of opportunity such as uncontrolled hypertension or diabetes).

31  
32 This study does not provide definitive findings on the value of developing individual site models  
33 compared to simply applying coefficients from multi-site or national model coefficients to local data.  
34 Our four-site regression models generally had comparable PPVs to individual site models, but for the  
35 majority of sites- the four-site regression approach correctly identified somewhat fewer number  
36 patients with future admissions. Though it is tempting to speculate on whether differences in the health  
37 needs of the population or coding differences affect model performance, we did not observe any clear  
38 patterns between the areas. Our analysis is somewhat limited by the small number of sites involved  
39 which might cause somewhat greater variability in regression coefficients (regression coefficients for  
40 each of the five four-site models are available at <http://www.nuffieldtrust.org.uk/> ). Development of a  
41  
42  
43  
44  
45  
46  
47  
48  
49  
50  
51  
52  
53  
54  
55  
56  
57  
58  
59  
60

1  
2  
3  
4  
5  
6  
7  
8  
9 national model using SUS data only is planned to further assess the need/value of locally developed  
10 models.

11  
12 Finally, it is worthy of note that use of the GP registry data for the denominator also proved to be of  
13 significant importance. Many prior predictive modeling efforts have been limited to patients with  
14 utilization history in whatever data sets were included. By including all patients in an area, not just  
15 those with prior use, the impact on predictive modeling of prior use was apparently enhanced. As a  
16 result, patients with more moderate levels of prior use and morbidity were found to be of higher risk  
17 than patients with no prior use at all, and were often assigned higher risk scores than when the analysis  
18 included just patients who had prior use. Accordingly, the use of the GP registry as the denominator can  
19 improve rates of case finding and may permit identification of patients at earlier stages.  
20  
21  
22  
23  
24  
25  
26  
27  
28  
29  
30  
31  
32  
33  
34  
35  
36  
37  
38  
39  
40  
41  
42  
43  
44  
45  
46  
47  
48  
49  
50  
51  
52  
53  
54  
55  
56  
57  
58  
59  
60



1  
2  
3  
4  
5  
6  
7  
8  
9  
10  
11  
12  
13  
14  
15  
16  
17  
18  
19  
20  
21  
22  
23  
24  
25  
26  
27  
28  
29  
30  
31  
32  
33  
34  
35  
36  
37  
38  
39  
40  
41  
42  
43  
44  
45  
46  
47  
48  
49  
50  
51  
52  
53  
54  
55  
56  
57  
58  
59  
60

#### **Acknowledgments**

The authors wish to thank all individuals in the PCTs who contributed data used for this study during the Whole Systems Demonstrator, Virtual Wards and Social care end of life studies.

#### **Contributors**

The preparation of data sets and input variables and costs were undertaken by TG and by IB; JB did the central modelling. MB advised on the analysis and results and managed the work of the research team at the Nuffield Trust. All authors contributed to the writing of the paper. JB is the guarantor.

#### **Funding and disclaimer**

The research received no specific grant but was funded by the Nuffield Trust. The resulting models will be used as part of the WSD trial funded by the Department of Health.

#### **Competing interests**

All authors have completed the Unified Competing Interest form at [www.icmje.org/coi\\_disclosure.pdf](http://www.icmje.org/coi_disclosure.pdf) and declare that no authors have any relationships with any companies that might have an interest in the submitted work in the previous 3 years; none of their spouses, partners or children have any financial relationships that may be relevant to the submitted work; and no authors have any non-financial interests that may be relevant to the submitted work.

#### **Ethical approval**

This study only involved the analysis of pseudonymous secondary data. Since there were no identifiable human subjects, ethics approval was not required for this research and informed consent was not sought.

#### **Provenance and peer review**

Not commissioned; externally peer reviewed.

#### **Data sharing statement**

Details of the derived models variables and definitions are available from the authors at the Nuffield trust at [research@nuffieldtrust.org.uk](mailto:research@nuffieldtrust.org.uk).

## References

- 1 Section 3025 of the Affordable Care Act added section 1886(q) to the Social Security Act establishing the Hospital Readmissions Reduction Program, which requires the Center for Medicare and Medicaid Services to reduce Medicare payments to hospitals with excess rates of readmissions for selected conditions within 30 days of discharge.
- 2 Department of Health. Payment by Results Guidance for 2012-13. 2012. Gateway reference 17250 London: Department of Health
- 3 Kansagara D, Englander H, Salanitro A, Kagen D, Theobald C, Freeman M, Kripalani S Risk prediction models for hospital readmission: A systematic review. *JAMA* 2011;306(15):1688-1698
- 4 Billings J, Mijanovich T. Improving the Management of Care for High Cost Medicaid Patients. *Health Affairs*. 2007;26(6):1643-1655.
- 5 Billings J, Dixon J, Wennberg D, et al. Case Finding for Patients at Risk of Re-Hospitalisation: Development of an Algorithm to Identify High Risk Patients. *BMJ* 2006;333(7563):327-32,
- 6 Case Finding Algorithms for Patients at Risk of Re-hospitalisation: PARR1 and PARR 2. Kings Fund, February, 2006 ([http://www.kingsfund.org.uk/sites/files/kf/field/field\\_document/PARR-case-finding-algorithms-feb06.pdf](http://www.kingsfund.org.uk/sites/files/kf/field/field_document/PARR-case-finding-algorithms-feb06.pdf) - last accessed 04/06/2013).
- 7 Lewis G, Curry N and Bardsley M Choosing a predictive risk model: a guide for commissioners in England
- 8 Combined Predictive Model: Final Report. Kings Fund, Dec 2006. ([http://www.kingsfund.org.uk/sites/files/kf/field/field\\_document/PARR-combined-predictive-model-final-report-dec06.pdf](http://www.kingsfund.org.uk/sites/files/kf/field/field_document/PARR-combined-predictive-model-final-report-dec06.pdf) last accessed 04/06/2013),
- 9 Wales Predictive Model: Final Report and Technical Documentation, 2008 (<http://www.nliah.com/portal/microsites/Uploads/Resources/k5cma8PPy.pdf> last accessed 04/06/2013).
- 10 <http://systems.hscic.gov.uk/data/uktc/readcodes> - last accessed 14/05/2013
- 11 <http://www.connectingforhealth.nhs.uk/systemsandservices/sus> - last accessed 14/1/2013.
- 12 National Institute of Standards and Technology. Secure Hash Standard (180-3). October 2008. ([http://csrc.nist.gov/publications/fips/fips180-3/fips180-3\\_final.pdf](http://csrc.nist.gov/publications/fips/fips180-3/fips180-3_final.pdf) last accessed 30 July 2013)
- 13 Charlson ME, Popei P, Ales KL, et al. A new method of classifying prognostic comorbidity in longitudinal studies: development and validation. *Journal of Chronic Disease*. 1987;40:373-383.
- 14 Dixon J, Smith P, Gravelle H, Martin S, Bardsley M, Rice H, Georghiou T, Dusheiko M, Billings J, De Lorenzo M. I. A person based formula for allocating commissioning funds to general practices in England: development of a statistical model *BMJ* 2011;343:d6608 doi: 10.1136/bmj.d6608 Published 22 November 2011.
- 15 Chenore T, Pereira Gray DJ, Forrer J, Wright C., Evans PH, Emergency hospital admissions for the elderly: insights from the Devon Predictive Model *J Public Health* (2013)

1  
2  
3  
4  
5  
6  
7  
8  
9  
10  
11  
12  
13  
14  
15  
16  
17  
18  
19  
20  
21  
22  
23  
24  
25  
26  
27  
28  
29  
30  
31  
32  
33  
34  
35  
36  
37  
38  
39  
40  
41  
42  
43  
44  
45  
46  
47  
48  
49  
50  
51  
52  
53  
54  
55  
56  
57  
58  
59  
60

[15-16](#) Raven M, Billings J, Goldfrank L, Manheimer E, Gourevitch M. Medicaid Patients at High Risk for Frequent Hospital Admission: Real-time Identification and Remedial Risks. *Journal of Urban Health.* 2009;86(2):230-241.

[17](#) Joynt KE, Gawande AA, Orav EJ, JHA AK. [Contribution of Preventable Acute Care Spending to Total Spending for High-Cost Medicare Patients.](#) *JAMA.* 2013;309(24):2572-2578.

For peer review only

Appendix A. PPV and sensitivity IPAEOP and IPAEOPGP models. Individual site runs.

| Risk Score<br>Threshold | IP+AE+OP Data |             |          |             |       |             |         |             |           |             |
|-------------------------|---------------|-------------|----------|-------------|-------|-------------|---------|-------------|-----------|-------------|
|                         | Newham        |             | Cornwall |             | Kent  |             | Croydon |             | Redbridge |             |
|                         | PPV           | Sensitivity | PPV      | Sensitivity | PPV   | Sensitivity | PPV     | Sensitivity | PPV       | Sensitivity |
| 1                       | 0.049         | 1.000       | 0.061    | 1.000       | 0.052 | 1.000       | 0.046   | 1.000       | 0.047     | 1.000       |
| 10                      | 0.236         | 0.361       | 0.216    | 0.391       | 0.213 | 0.339       | 0.241   | 0.378       | 0.238     | 0.425       |
| 20                      | 0.368         | 0.201       | 0.328    | 0.188       | 0.326 | 0.158       | 0.377   | 0.210       | 0.357     | 0.236       |
| 30                      | 0.450         | 0.136       | 0.406    | 0.109       | 0.401 | 0.094       | 0.444   | 0.142       | 0.420     | 0.149       |
| 40                      | 0.506         | 0.098       | 0.477    | 0.072       | 0.457 | 0.062       | 0.486   | 0.100       | 0.475     | 0.098       |
| 50                      | 0.552         | 0.071       | 0.520    | 0.047       | 0.513 | 0.043       | 0.528   | 0.073       | 0.512     | 0.067       |
| 60                      | 0.585         | 0.052       | 0.560    | 0.030       | 0.569 | 0.031       | 0.580   | 0.055       | 0.532     | 0.044       |
| 70                      | 0.632         | 0.037       | 0.622    | 0.021       | 0.618 | 0.022       | 0.610   | 0.040       | 0.555     | 0.028       |
| 80                      | 0.678         | 0.024       | 0.655    | 0.013       | 0.673 | 0.014       | 0.659   | 0.028       | 0.571     | 0.016       |
| 90                      | 0.717         | 0.013       | 0.692    | 0.007       | 0.724 | 0.008       | 0.710   | 0.016       | 0.617     | 0.008       |
| Top 1%                  | 0.501         | 0.102       | 0.470    | 0.077       | 0.417 | 0.080       | 0.482   | 0.106       | 0.474     | 0.101       |
| Top 5%                  | 0.287         | 0.291       | 0.292    | 0.240       | 0.259 | 0.249       | 0.290   | 0.318       | 0.296     | 0.316       |

  

| Risk Score<br>Threshold | IP+AE+OP+GP Data |             |          |             |       |             |         |             |           |             |
|-------------------------|------------------|-------------|----------|-------------|-------|-------------|---------|-------------|-----------|-------------|
|                         | Newham           |             | Cornwall |             | Kent  |             | Croydon |             | Redbridge |             |
|                         | PPV              | Sensitivity | PPV      | Sensitivity | PPV   | Sensitivity | PPV     | Sensitivity | PPV       | Sensitivity |
| 1                       | 0.049            | 1.000       | 0.061    | 1.000       | 0.052 | 1.000       | 0.046   | 1.000       | 0.047     | 1.000       |
| 10                      | 0.228            | 0.410       | 0.213    | 0.439       | 0.210 | 0.392       | 0.237   | 0.452       | 0.237     | 0.457       |
| 20                      | 0.360            | 0.235       | 0.323    | 0.232       | 0.314 | 0.194       | 0.358   | 0.267       | 0.348     | 0.272       |
| 30                      | 0.439            | 0.152       | 0.410    | 0.136       | 0.397 | 0.113       | 0.442   | 0.174       | 0.423     | 0.172       |
| 40                      | 0.499            | 0.103       | 0.481    | 0.084       | 0.459 | 0.072       | 0.494   | 0.114       | 0.482     | 0.113       |
| 50                      | 0.566            | 0.074       | 0.545    | 0.053       | 0.521 | 0.048       | 0.550   | 0.079       | 0.522     | 0.073       |
| 60                      | 0.606            | 0.052       | 0.602    | 0.033       | 0.580 | 0.032       | 0.589   | 0.052       | 0.563     | 0.047       |
| 70                      | 0.657            | 0.036       | 0.659    | 0.021       | 0.644 | 0.021       | 0.643   | 0.035       | 0.616     | 0.030       |
| 80                      | 0.723            | 0.021       | 0.714    | 0.013       | 0.694 | 0.013       | 0.694   | 0.021       | 0.651     | 0.018       |
| 90                      | 0.766            | 0.012       | 0.745    | 0.006       | 0.752 | 0.007       | 0.735   | 0.011       | 0.655     | 0.007       |
| Top 1%                  | 0.504            | 0.102       | 0.490    | 0.081       | 0.438 | 0.084       | 0.502   | 0.110       | 0.487     | 0.104       |
| Top 5%                  | 0.296            | 0.300       | 0.309    | 0.254       | 0.272 | 0.262       | 0.307   | 0.337       | 0.312     | 0.333       |

1  
2  
3  
4  
5  
6  
7  
8  
9  
10  
11  
12  
13  
14  
15  
16  
17  
18  
19  
20  
21  
22  
23  
24  
25  
26  
27  
28  
29  
30  
31  
32  
33  
34  
35  
36  
37  
38  
39  
40  
41  
42  
43  
44  
45  
46  
47  
48  
49  
50  
51  
52  
53  
54  
55  
56  
57  
58  
59  
60

Appendix B Regression coefficients. IPAEOP and IPAEOPGP models. Individual site runs.

|                                                       | IP+AE+OP Data |        |        |        |        | IP+AE+OP+GP Data |        |        |        |        |
|-------------------------------------------------------|---------------|--------|--------|--------|--------|------------------|--------|--------|--------|--------|
|                                                       | NH            | CW     | KT     | CR     | RB     | NH               | CW     | KT     | CR     | RB     |
| Age                                                   | 0.015         | 0.003  | 0.009  | 0.010  | 0.019  | 0.001            | -0.004 | 0.002  | 0.001  | 0.009  |
| Age 65-74                                             | 0.280         | 0.409  | 0.295  | 0.380  | 0.261  | 0.236            | 0.276  | 0.203  | 0.244  | 0.245  |
| Age 75-84                                             | 0.738         | 0.905  | 0.731  | 0.847  | 0.734  | 0.721            | 0.672  | 0.605  | 0.708  | 0.749  |
| Age 85+                                               | 1.076         | 1.483  | 1.226  | 1.178  | 1.109  | 1.150            | 1.206  | 1.086  | 1.187  | 1.213  |
| Female                                                | 0.239         | 0.002  | 0.044  | 0.178  | 0.058  | 0.114            | -0.095 | -0.075 | -0.014 | -0.030 |
| Practice IMD                                          | 0.013         | 0.003  | 0.016  | 0.018  | 0.012  | 0.008            | 0.004  | 0.017  | 0.010  | 0.015  |
| Months registered 1 yr prior                          | 0.014         | -0.011 | -0.005 | -0.018 | -0.013 | 0.011            | -0.011 | -0.003 | -0.010 | -0.006 |
| Months registered 2 yrs prior                         | -0.022        | -0.019 | -0.016 | -0.007 | -0.023 | -0.021           | -0.024 | -0.019 | -0.011 | -0.021 |
| EM Adms prior 0-90 days                               | 0.382         | 0.471  | 0.321  | 0.310  | 0.282  | 0.367            | 0.420  | 0.283  | 0.269  | 0.259  |
| EL Adms prior 0-90 days                               | 0.045         | 0.216  | 0.155  | 0.153  | 0.148  | 0.033            | 0.159  | 0.074  | 0.097  | 0.069  |
| Any attender prior 0-90 days                          | 0.115         | 0.027  | 0.001  | 0.041  | 0.073  | 0.135            | 0.026  | 0.010  | 0.042  | 0.064  |
| Any day case prior 0-90 days                          | 0.094         | 0.234  | 0.110  | 0.111  | 0.251  | 0.037            | 0.173  | 0.039  | -0.019 | 0.130  |
| EM Adms prior 91-180 days                             | 0.215         | 0.310  | 0.351  | 0.282  | 0.185  | 0.217            | 0.262  | 0.297  | 0.243  | 0.160  |
| EL Adms prior 91-180 days                             | 0.321         | 0.150  | 0.062  | 0.204  | 0.081  | 0.283            | 0.128  | 0.027  | 0.118  | 0.024  |
| EM Adms prior 181-365 days                            | 0.113         | 0.345  | 0.350  | 0.248  | 0.146  | 0.124            | 0.289  | 0.292  | 0.227  | 0.129  |
| EL Adms prior 181-365 days                            | 0.097         | 0.120  | 0.104  | 0.118  | 0.170  | 0.072            | 0.079  | 0.060  | 0.035  | 0.108  |
| Em Adms 2 yrs prior                                   | 0.102         | 0.269  | 0.307  | 0.181  | 0.143  | 0.116            | 0.216  | 0.250  | 0.178  | 0.149  |
| Any day case 2 yrs prior                              | 0.096         | 0.157  | 0.186  | 0.151  | 0.179  | 0.058            | 0.092  | 0.112  | 0.005  | 0.103  |
| DX MI                                                 | -0.108        | 0.097  | -0.105 | -0.004 | 0.376  | -0.197           | -0.003 | -0.163 | -0.111 | 0.228  |
| DX CHF                                                | -0.348        | -0.070 | -0.246 | -0.069 | -0.337 | -0.370           | -0.178 | -0.269 | -0.110 | -0.216 |
| DX CVD                                                | 0.296         | 0.227  | 0.033  | 0.037  | -0.040 | 0.269            | 0.166  | -0.001 | -0.099 | -0.061 |
| CD CTD                                                | 0.030         | -0.024 | 0.101  | -0.380 | -0.029 | 0.071            | -0.192 | -0.010 | -0.427 | -0.039 |
| DX PVD                                                | -0.245        | 0.124  | 0.099  | -0.100 | 0.021  | -0.253           | 0.048  | 0.026  | -0.096 | 0.003  |
| DX Asthma                                             | 0.082         | 0.143  | 0.184  | 0.099  | 0.192  | -0.114           | -0.107 | -0.023 | -0.081 | 0.028  |
| DX COPD                                               | 0.204         | 0.251  | 0.277  | 0.193  | 0.123  | -0.169           | -0.139 | -0.036 | -0.330 | -0.269 |
| DX Diabetes                                           | 0.240         | 0.303  | 0.285  | 0.253  | 0.276  | -0.046           | -0.052 | -0.016 | -0.124 | 0.011  |
| DX Diabetes with complications                        | 0.059         | -0.221 | 0.062  | -0.014 | 0.334  | 0.062            | -0.176 | 0.095  | 0.004  | 0.262  |
| DX Renal Disease                                      | 0.408         | 0.022  | 0.085  | 0.128  | 0.199  | 0.356            | 0.005  | 0.073  | 0.063  | 0.120  |
| DX Cancer                                             | -0.165        | -0.019 | -0.062 | -0.308 | 0.041  | 0.041            | 0.098  | -0.010 | -0.207 | 0.034  |
| DX Mental                                             | 0.498         | 0.316  | 0.363  | 0.484  | 0.077  | 0.340            | 0.131  | 0.111  | 0.266  | -0.061 |
| DX Alcohol                                            | 0.569         | 0.684  | 0.578  | 0.673  | 0.974  | 0.281            | 0.530  | 0.357  | 0.409  | 0.754  |
| DX Dementia                                           | -0.548        | -0.589 | -0.551 | -0.402 | -0.596 | -0.530           | -0.486 | -0.440 | -0.669 | -0.641 |
| DX Cognitive Impairment                               | -0.117        | 0.016  | 0.025  | 0.110  | 0.187  | -0.075           | 0.046  | 0.031  | 0.088  | 0.152  |
| DX ACS Condition                                      | 0.364         | 0.270  | 0.239  | 0.267  | 0.306  | 0.269            | 0.161  | 0.134  | 0.114  | 0.224  |
| Charlson Index                                        | 0.055         | 0.063  | 0.060  | 0.101  | 0.025  | 0.048            | 0.062  | 0.037  | 0.086  | 0.029  |
| AE visits prior 0-90 days                             | 0.236         | 0.267  | 0.355  | 0.309  | 0.359  | 0.179            | 0.230  | 0.265  | 0.199  | 0.260  |
| AE unplanned follow-up visits prior 0-90 days         | -0.094        | -0.583 | -0.533 | -0.874 | -0.383 | -0.107           | -0.566 | -0.452 | -0.703 | -0.315 |
| AE X-ray prior 0-90 days                              | 0.348         | 0.437  | 0.058  | 0.104  | 0.367  | 0.303            | 0.382  | 0.027  | 0.040  | 0.317  |
| AE visits prior 91-180 days                           | 0.265         | 0.262  | 0.220  | 0.225  | 0.277  | 0.197            | 0.225  | 0.165  | 0.142  | 0.210  |
| AE unplanned follow-up visits prior 91-180 days       | -0.023        | -0.560 | -0.229 | -0.296 | -0.298 | -0.026           | -0.543 | -0.177 | -0.225 | -0.286 |
| AE X-ray prior 91-180 days                            | 0.227         | 0.117  | 0.120  | 0.346  | -0.064 | 0.210            | 0.015  | 0.101  | 0.237  | 0.010  |
| AE visits prior 181-365 days                          | 0.264         | 0.205  | 0.135  | 0.171  | 0.181  | 0.216            | 0.174  | 0.090  | 0.115  | 0.138  |
| AE unplanned follow-up visits prior 181-365 days      | -0.251        | -0.490 | -0.184 | -0.261 | -0.203 | -0.214           | -0.449 | -0.131 | -0.175 | -0.221 |
| AE X-ray prior 181-365 days                           | 0.262         | -0.040 | 0.281  | 0.324  | 0.110  | 0.225            | 0.085  | 0.251  | 0.244  | 0.072  |
| AE visits 2 yrs prior                                 | 0.211         | 0.159  | 0.154  | 0.140  | 0.160  | 0.170            | 0.138  | 0.114  | 0.077  | 0.121  |
| AE unplanned follow-up visits 2 yrs prior             | -0.307        | -0.352 | -0.239 | -0.433 | -0.339 | -0.228           | -0.317 | -0.178 | -0.262 | -0.288 |
| AE X-ray 2yrs prior                                   | 0.083         | 0.231  | 0.100  | 0.128  | 0.179  | 0.063            | 0.390  | 0.082  | 0.069  | 0.152  |
| Outpatient specialty visits prior 0-90 days           | 0.046         | 0.055  | 0.091  | 0.061  | 0.059  | 0.025            | 0.033  | 0.047  | 0.030  | 0.027  |
| Outpatient specialty visits missed prior 0-90 days    | 0.155         | 0.182  | 0.250  |        | 0.146  | 0.108            | 0.118  | 0.171  |        | 0.097  |
| Outpatient specialty visits missed prior 91-180 days  | 0.030         | 0.013  | 0.023  | 0.034  | 0.029  | 0.007            | 0.003  | -0.004 | 0.015  | 0.011  |
| Outpatient specialty visits missed prior 91-180 days  | 0.113         | 0.239  | 0.168  |        | 0.193  | 0.087            | 0.184  | 0.113  |        | 0.159  |
| Outpatient specialty visits missed prior 181-365 days | 0.016         | 0.010  | -0.005 | 0.019  | 0.031  | -0.003           | 0.001  | -0.024 | 0.003  | 0.018  |
| Outpatient specialty visits missed prior 181-365 days | 0.128         | 0.164  | 0.075  |        | 0.140  | 0.086            | 0.095  | 0.036  |        | 0.122  |
| Outpatient specialty visits 2 yrs prior               | 0.019         | 0.030  | 0.014  | 0.028  | 0.019  | 0.008            | 0.014  | -0.009 | 0.011  | 0.021  |

Formatted Table

1  
2  
3  
4  
5  
6  
7  
8  
9  
10  
11  
12  
13  
14  
15  
16  
17  
18  
19  
20  
21  
22  
23  
24  
25  
26  
27  
28  
29  
30  
31  
32  
33  
34  
35  
36  
37  
38  
39  
40  
41  
42  
43  
44  
45  
46  
47  
48  
49  
50  
51  
52  
53  
54  
55  
56  
57  
58  
59  
60

|                                                         |        |        |        |        |        |        |        |        |        |        |
|---------------------------------------------------------|--------|--------|--------|--------|--------|--------|--------|--------|--------|--------|
| Outpatient specialty visits missed 2 yrs prior          | 0.142  | 0.162  | 0.140  | 0.190  | 0.082  | 0.097  | 0.090  | 0.085  | 0.129  | 0.057  |
| GP DX COPD                                              |        |        |        |        |        | 0.218  | 0.174  | 0.112  | 0.287  | 0.295  |
| GP - 1 long term condition                              |        |        |        |        |        | 0.131  | 0.025  | 0.017  | 0.106  | 0.192  |
| GP - 2 or more long term conditions                     |        |        |        |        |        | 0.166  | 0.109  | 0.038  | 0.070  | 0.182  |
| GP - Glomerular filtration rate group 3 last 0-365 days |        |        |        |        |        | -0.075 | 0.092  | -0.017 |        | 0.050  |
| GP - 10+ unique drugs prescribed                        |        |        |        |        |        | 0.342  | 0.570  | 0.166  | 2.741  | 1.949  |
| GP - 5-9 unique drugs prescribed                        |        |        |        |        |        | 0.424  | 0.444  | 0.164  | 2.804  | 1.953  |
| GP - 0-4 unique drugs prescribed                        |        |        |        |        |        | 0.328  | 0.254  | 0.114  | 2.559  | 1.809  |
| GP - Psychoactive substance misuse disorder             |        |        |        |        |        | 0.388  | 0.323  | 0.583  | 0.431  | 0.810  |
| GP - 7+ distinct disorders                              |        |        |        |        |        | -0.049 | 0.057  | 0.017  | -0.163 | -0.062 |
| GP - GP visits prior 0-3 months                         |        |        |        |        |        | -0.001 | 0.008  | 0.022  | 0.021  | 0.042  |
| GP - GP visits prior 4-6 months                         |        |        |        |        |        | 0.015  | 0.004  | 0.012  | 0.009  | 0.019  |
| GP - GP visits prior 7-12 months                        |        |        |        |        |        | 0.005  | 0.003  | 0.007  | 0.000  | 0.008  |
| GP - GP visits 2yrs prior                               |        |        |        |        |        | 0.000  | 0.002  | 0.004  | 0.006  | 0.002  |
| GP - Increasing rate of GP visits during last 12 months |        |        |        |        |        | 0.184  | 0.087  | 0.126  | 0.207  | 0.094  |
| GP - Number of high risk BNFs                           |        |        |        |        |        | 0.063  | 0.006  | -0.036 | -0.026 | -0.075 |
| GP - Any high risk                                      |        |        |        |        |        | 0.219  | 0.202  | 0.241  | 0.324  | 0.249  |
| GP - Count of BNF chapters                              |        |        |        |        |        | 0.066  | 0.053  | 0.059  | 0.066  | -0.024 |
| GP - DX Dementia                                        |        |        |        |        |        | 0.421  | 0.266  | 0.296  | 0.471  | 0.437  |
| GP - Exception reported from quality indicators         |        |        |        |        |        | 0.157  | 0.108  | 0.111  | 0.118  | 0.132  |
| GP - Health visitor or district nurse visit             |        |        |        |        |        | 0.278  | 0.244  | 0.199  | 0.168  | 0.184  |
| GP - Record of IHD/angina                               |        |        |        |        |        | 0.069  | -0.048 | 0.110  | -0.062 | 0.081  |
| GP - Nebuliser used                                     |        |        |        |        |        | 0.113  | 0.315  | 0.207  | 0.191  | 0.448  |
| GP - Salbutamol prescribed                              |        |        |        |        |        | 0.021  | 0.017  | 0.074  | 0.000  | -0.011 |
| GP - Warfarin prescribed                                |        |        |        |        |        | -0.041 | 0.031  | -0.026 | -0.100 | -0.244 |
| GP - High blood pressure                                |        |        |        |        |        | -0.040 | -0.001 | -0.013 | -0.048 | -0.087 |
| GP - Smoker                                             |        |        |        |        |        | 0.298  | 0.231  | 0.248  | 0.240  | 0.220  |
| GP - BMI 30+                                            |        |        |        |        |        | 0.050  | 0.002  | 0.085  | 0.046  | 0.199  |
| GP - HbA1c > 10                                         |        |        |        |        |        | 0.236  | 0.270  | 0.210  | 0.362  | 0.354  |
| GD - QOF ARTF                                           |        |        |        |        |        | 0.176  | 0.064  | 0.095  | -0.047 | 0.143  |
| GP - QOF CKD                                            |        |        |        |        |        | 0.206  | -0.003 | -0.037 | 0.091  | 0.210  |
| GP - QOF Depression                                     |        |        |        |        |        | 0.069  | 0.248  | 0.183  | 0.133  | 0.186  |
| GP - Number of QOF DX categories 3+                     |        |        |        |        |        | 0.003  | -0.023 | -0.072 | -0.135 | -0.009 |
| GP - Number of phone contacts last 0-3 months           |        |        |        |        |        | -0.004 | 0.046  | 0.004  | -0.005 | -0.004 |
| Constant                                                | -4.665 | -3.262 | -3.987 | -4.363 | -4.368 | -4.381 | -3.275 | -4.069 | -6.497 | -5.939 |

1  
2  
3  
4  
5  
6  
7  
8  
9  
10  
11  
12  
13  
14  
15  
16  
17  
18  
19  
20  
21  
22  
23  
24  
25  
26  
27  
28  
29  
30  
31  
32  
33  
34  
35  
36  
37  
38  
39  
40  
41  
42  
43  
44  
45  
46  
47  
48  
49  
50  
51  
52  
53  
54  
55  
56  
57  
58  
59  
60

## Appendix C Regression significance levels. IPAEOP and IPAEOPGP models. Individual site runs.

|                                                       | IP+AE+OP Data |       |       |       |       | IP+AE+OP+GP Data |       |       |       |       |
|-------------------------------------------------------|---------------|-------|-------|-------|-------|------------------|-------|-------|-------|-------|
|                                                       | NH            | CW    | KT    | CR    | RB    | NH               | CW    | KT    | CR    | RB    |
| Age                                                   | 0.000         | 0.000 | 0.000 | 0.000 | 0.000 | 0.344            | 0.000 | 0.001 | 0.158 | 0.000 |
| Age 65-74                                             | 0.000         | 0.000 | 0.000 | 0.000 | 0.000 | 0.000            | 0.000 | 0.000 | 0.000 | 0.000 |
| Age 75-84                                             | 0.000         | 0.000 | 0.000 | 0.000 | 0.000 | 0.000            | 0.000 | 0.000 | 0.000 | 0.000 |
| Age 85+                                               | 0.000         | 0.000 | 0.000 | 0.000 | 0.000 | 0.000            | 0.000 | 0.000 | 0.000 | 0.000 |
| Female                                                | 0.007         | 0.897 | 0.000 | 0.001 | 0.125 | 0.000            | 0.000 | 0.000 | 0.466 | 0.165 |
| Practice IMD                                          | 0.008         | 0.036 | 0.000 | 0.000 | 0.000 | 0.015            | 0.010 | 0.000 | 0.000 | 0.000 |
| Months registered 1 yr prior                          | 0.002         | 0.006 | 0.085 | 0.247 | 0.047 | 0.009            | 0.011 | 0.387 | 0.026 | 0.255 |
| Months registered 2 yrs prior                         | 0.001         | 0.014 | 0.006 | 0.232 | 0.276 | 0.009            | 0.003 | 0.001 | 0.211 | 0.025 |
| EM Adms prior 0-90 days                               | 0.000         | 0.000 | 0.000 | 0.000 | 0.000 | 0.000            | 0.000 | 0.000 | 0.000 | 0.000 |
| EL Adms prior 0-90 days                               | 0.664         | 0.000 | 0.000 | 0.029 | 0.081 | 0.714            | 0.000 | 0.070 | 0.102 | 0.373 |
| Any attender prior 0-90 days                          | 0.002         | 0.000 | 0.955 | 0.006 | 0.004 | 0.001            | 0.000 | 0.489 | 0.005 | 0.008 |
| Any day case prior 0-90 days                          | 0.769         | 0.000 | 0.001 | 0.682 | 0.001 | 0.561            | 0.000 | 0.233 | 0.699 | 0.015 |
| EM Adms prior 91-180 days                             | 0.000         | 0.000 | 0.000 | 0.000 | 0.000 | 0.000            | 0.000 | 0.000 | 0.000 | 0.002 |
| EL Adms prior 91-180 days                             | 0.000         | 0.000 | 0.068 | 0.022 | 0.528 | 0.000            | 0.001 | 0.437 | 0.016 | 0.680 |
| EM Adms prior 181-365 days                            | 0.000         | 0.000 | 0.000 | 0.000 | 0.000 | 0.001            | 0.000 | 0.000 | 0.000 | 0.000 |
| EL Adms prior 181-365 days                            | 0.548         | 0.000 | 0.000 | 0.757 | 0.019 | 0.167            | 0.009 | 0.030 | 0.372 | 0.014 |
| Em Adms 2 yrs prior                                   | 0.000         | 0.000 | 0.000 | 0.000 | 0.000 | 0.000            | 0.000 | 0.000 | 0.000 | 0.000 |
| Any day case 2 yrs prior                              | 0.877         | 0.000 | 0.000 | 0.536 | 0.035 | 0.177            | 0.000 | 0.000 | 0.864 | 0.005 |
| DX MI                                                 | 0.366         | 0.134 | 0.049 | 0.611 | 0.000 | 0.076            | 0.966 | 0.002 | 0.216 | 0.017 |
| DX CHF                                                | 0.024         | 0.253 | 0.000 | 0.448 | 0.008 | 0.001            | 0.005 | 0.000 | 0.194 | 0.026 |
| DX CVD                                                | 0.015         | 0.000 | 0.446 | 0.610 | 0.571 | 0.013            | 0.002 | 0.977 | 0.179 | 0.504 |
| CD CTD                                                | 0.263         | 0.756 | 0.150 | 0.010 | 0.759 | 0.645            | 0.013 | 0.891 | 0.000 | 0.766 |
| DX PVD                                                | 0.230         | 0.061 | 0.097 | 0.567 | 0.665 | 0.079            | 0.462 | 0.661 | 0.270 | 0.982 |
| DX Asthma                                             | 0.351         | 0.002 | 0.000 | 0.241 | 0.015 | 0.135            | 0.024 | 0.580 | 0.184 | 0.698 |
| DX COPD                                               | 0.005         | 0.000 | 0.000 | 0.009 | 0.098 | 0.098            | 0.021 | 0.483 | 0.002 | 0.041 |
| DX Diabetes                                           | 0.000         | 0.000 | 0.000 | 0.000 | 0.000 | 0.444            | 0.227 | 0.649 | 0.016 | 0.845 |
| DX Diabetes with complications                        | 0.478         | 0.025 | 0.540 | 0.363 | 0.013 | 0.674            | 0.073 | 0.347 | 0.973 | 0.083 |
| DX Renal Disease                                      | 0.000         | 0.731 | 0.142 | 0.068 | 0.025 | 0.001            | 0.942 | 0.208 | 0.405 | 0.210 |
| DX Cancer                                             | 0.753         | 0.751 | 0.271 | 0.001 | 0.421 | 0.727            | 0.104 | 0.862 | 0.009 | 0.721 |
| DX Mental                                             | 0.000         | 0.000 | 0.000 | 0.000 | 0.370 | 0.000            | 0.005 | 0.008 | 0.000 | 0.447 |
| DX Alcohol                                            | 0.000         | 0.000 | 0.000 | 0.000 | 0.000 | 0.029            | 0.000 | 0.000 | 0.000 | 0.000 |
| DX Dementia                                           | 0.005         | 0.000 | 0.000 | 0.000 | 0.000 | 0.004            | 0.000 | 0.000 | 0.000 | 0.000 |
| DX Cognitive Impairment                               | 0.430         | 0.804 | 0.620 | 0.191 | 0.026 | 0.456            | 0.474 | 0.534 | 0.199 | 0.080 |
| DX ACS Condition                                      | 0.000         | 0.000 | 0.000 | 0.000 | 0.000 | 0.000            | 0.000 | 0.000 | 0.001 | 0.000 |
| Charlson Index                                        | 0.012         | 0.000 | 0.000 | 0.000 | 0.212 | 0.042            | 0.000 | 0.006 | 0.000 | 0.160 |
| AE visits prior 0-90 days                             | 0.000         | 0.000 | 0.000 | 0.000 | 0.000 | 0.000            | 0.000 | 0.000 | 0.000 | 0.000 |
| AE unplanned follow-up visits prior 0-90 days         | 0.895         | 0.001 | 0.000 | 0.000 | 0.133 | 0.654            | 0.001 | 0.000 | 0.000 | 0.121 |
| AE X-ray prior 0-90 days                              | 0.002         | 0.000 | 0.301 | 0.374 | 0.052 | 0.004            | 0.002 | 0.636 | 0.662 | 0.035 |
| AE visits prior 91-180 days                           | 0.000         | 0.000 | 0.000 | 0.000 | 0.000 | 0.000            | 0.000 | 0.000 | 0.000 | 0.000 |
| AE unplanned follow-up visits prior 91-180 days       | 0.836         | 0.000 | 0.000 | 0.149 | 0.130 | 0.899            | 0.000 | 0.005 | 0.214 | 0.055 |
| AE X-ray prior 91-180 days                            | 0.070         | 0.582 | 0.045 | 0.002 | 0.672 | 0.062            | 0.946 | 0.090 | 0.009 | 0.985 |
| AE visits prior 181-365 days                          | 0.000         | 0.000 | 0.000 | 0.000 | 0.000 | 0.000            | 0.000 | 0.000 | 0.000 | 0.000 |
| AE unplanned follow-up visits prior 181-365 days      | 0.182         | 0.000 | 0.001 | 0.122 | 0.124 | 0.098            | 0.001 | 0.013 | 0.127 | 0.041 |
| AE X-ray prior 181-365 days                           | 0.000         | 0.936 | 0.000 | 0.000 | 0.461 | 0.001            | 0.866 | 0.000 | 0.000 | 0.485 |
| AE visits 2 yrs prior                                 | 0.000         | 0.000 | 0.000 | 0.000 | 0.000 | 0.000            | 0.000 | 0.000 | 0.000 | 0.000 |
| AE unplanned follow-up visits 2 yrs prior             | 0.021         | 0.008 | 0.000 | 0.003 | 0.009 | 0.020            | 0.016 | 0.000 | 0.008 | 0.005 |
| AE X-ray 2yrs prior                                   | 0.183         | 0.555 | 0.019 | 0.022 | 0.005 | 0.210            | 0.320 | 0.048 | 0.161 | 0.006 |
| Outpatient specialty visits prior 0-90 days           | 0.000         | 0.000 | 0.000 | 0.000 | 0.000 | 0.000            | 0.000 | 0.000 | 0.000 | 0.000 |
| Outpatient specialty visits missed prior 0-90 days    | 0.000         | 0.000 | 0.000 |       | 0.002 | 0.000            | 0.000 | 0.000 |       | 0.008 |
| Outpatient specialty visits prior 91-180 days         | 0.196         | 0.043 | 0.003 | 0.002 | 0.016 | 0.516            | 0.630 | 0.648 | 0.054 | 0.184 |
| Outpatient specialty visits missed prior 91-180 days  | 0.027         | 0.000 | 0.000 |       | 0.000 | 0.039            | 0.000 | 0.002 |       | 0.000 |
| Outpatient specialty visits prior 181-365 days        | 0.763         | 0.009 | 0.400 | 0.094 | 0.000 | 0.595            | 0.844 | 0.000 | 0.491 | 0.002 |
| Outpatient specialty visits missed prior 181-365 days | 0.000         | 0.000 | 0.009 |       | 0.000 | 0.001            | 0.002 | 0.206 |       | 0.000 |
| Outpatient specialty visits 2 yrs prior               | 0.000         | 0.000 | 0.000 | 0.000 | 0.000 | 0.068            | 0.000 | 0.046 | 0.001 | 0.000 |

1  
2  
3  
4  
5  
6  
7  
8  
9  
10  
11  
12  
13  
14  
15  
16  
17  
18  
19  
20  
21  
22  
23  
24  
25  
26  
27  
28  
29  
30  
31  
32  
33  
34  
35  
36  
37  
38  
39  
40  
41  
42  
43  
44  
45  
46  
47  
48  
49  
50  
51  
52  
53  
54  
55  
56  
57  
58  
59  
60

|                                                         |       |       |       |       |       |       |       |       |       |       |
|---------------------------------------------------------|-------|-------|-------|-------|-------|-------|-------|-------|-------|-------|
| Outpatient specialty visits missed 2 yrs prior          | 0.000 | 0.000 | 0.000 | 0.000 | 0.001 | 0.000 | 0.006 | 0.000 | 0.000 | 0.000 |
| GP DX COPD                                              |       |       |       |       |       | 0.002 | 0.000 | 0.001 | 0.000 | 0.003 |
| GP - 1 long term condition                              |       |       |       |       |       | 0.000 | 0.229 | 0.310 | 0.000 | 0.000 |
| GP - 2 or more long term conditions                     |       |       |       |       |       | 0.001 | 0.000 | 0.100 | 0.098 | 0.000 |
| GP - Glomerular filtration rate group 3 last 0-365 days |       |       |       |       |       | 0.097 | 0.002 | 0.463 |       | 0.162 |
| GP - 10+ unique drugs prescribed                        |       |       |       |       |       | 0.000 | 0.000 | 0.000 | 0.000 | 0.000 |
| GP - 5-9 unique drugs prescribed                        |       |       |       |       |       | 0.000 | 0.000 | 0.000 | 0.000 | 0.000 |
| GP - 0-4 unique drugs prescribed                        |       |       |       |       |       | 0.000 | 0.000 | 0.000 | 0.000 | 0.000 |
| GP - Psychoactive substance misuse disorder             |       |       |       |       |       | 0.000 | 0.000 | 0.000 | 0.000 | 0.000 |
| GP - 7+ distinct disorders                              |       |       |       |       |       | 0.311 | 0.290 | 0.523 | 0.002 | 0.263 |
| GP visits prior 0-3 months                              |       |       |       |       |       | 0.873 | 0.002 | 0.000 | 0.000 | 0.000 |
| GP visits prior 4-6 months                              |       |       |       |       |       | 0.000 | 0.182 | 0.000 | 0.008 | 0.000 |
| GP visits prior 7-12 months                             |       |       |       |       |       | 0.075 | 0.136 | 0.000 | 0.987 | 0.006 |
| GP visits 2yrs prior                                    |       |       |       |       |       | 0.934 | 0.013 | 0.000 | 0.000 | 0.263 |
| GP - Increasing rate of GP visits during last 12 months |       |       |       |       |       | 0.000 | 0.001 | 0.000 | 0.000 | 0.010 |
| GP - Number of high risk BNFs                           |       |       |       |       |       | 0.009 | 0.691 | 0.004 | 0.216 | 0.002 |
| GP - Any high risk                                      |       |       |       |       |       | 0.000 | 0.000 | 0.000 | 0.000 | 0.000 |
| GP - Count of BNF chapters                              |       |       |       |       |       | 0.000 | 0.000 | 0.000 | 0.000 | 0.000 |
| GP - DX Dementia                                        |       |       |       |       |       | 0.000 | 0.000 | 0.000 | 0.000 | 0.000 |
| GP - Exception reported from quality indicators         |       |       |       |       |       | 0.020 | 0.003 | 0.001 | 0.020 | 0.062 |
| GP - Health visitor or district nurse visit             |       |       |       |       |       | 0.000 | 0.000 | 0.000 | 0.000 | 0.000 |
| GP - Record of IHD/angina                               |       |       |       |       |       | 0.355 | 0.361 | 0.006 | 0.202 | 0.288 |
| GP - Nebuliser used                                     |       |       |       |       |       | 0.359 | 0.000 | 0.001 | 0.019 | 0.001 |
| GP - Salbutamol prescribed                              |       |       |       |       |       | 0.550 | 0.523 | 0.001 | 0.989 | 0.795 |
| GP - Warfarin prescribed                                |       |       |       |       |       | 0.643 | 0.423 | 0.440 | 0.106 | 0.001 |
| GP - High blood pressure                                |       |       |       |       |       | 0.269 | 0.984 | 0.549 | 0.725 | 0.325 |
| GP - Smoker                                             |       |       |       |       |       | 0.000 | 0.000 | 0.000 | 0.000 | 0.000 |
| GP - BMI 30+                                            |       |       |       |       |       | 0.074 | 0.956 | 0.000 | 0.074 | 0.000 |
| GP - HbA1c > 10                                         |       |       |       |       |       | 0.000 | 0.000 | 0.000 | 0.000 | 0.000 |
| GD - QOF ARTF                                           |       |       |       |       |       | 0.130 | 0.240 | 0.024 | 0.586 | 0.136 |
| GP - QOF CKD                                            |       |       |       |       |       | 0.003 | 0.924 | 0.203 | 0.063 | 0.000 |
| GP - QOF Depression                                     |       |       |       |       |       | 0.240 | 0.000 | 0.000 | 0.024 | 0.016 |
| GP - Number of QOF DX categories 3+                     |       |       |       |       |       | 0.974 | 0.717 | 0.123 | 0.342 | 0.948 |
| GP - Number of phone contacts last 0-3 months           |       |       |       |       |       | 0.927 | 0.000 | 0.600 | 0.788 | 0.899 |
| Constant                                                | 0.000 | 0.000 | 0.000 | 0.000 | 0.000 | 0.000 | 0.000 | 0.000 | 0.000 | 0.000 |



## Appendix D Further information of model variables

| Variable                                         | Variable description                                                             | Time period/Date                   |
|--------------------------------------------------|----------------------------------------------------------------------------------|------------------------------------|
| <b>GP register variables</b>                     |                                                                                  |                                    |
| Age                                              | Age                                                                              | End calendar year (5 months after) |
| Age 65-74                                        | Age 65-74                                                                        | End calendar year (5 months after) |
| Age 75-84                                        | Age 75-84                                                                        | End calendar year (5 months after) |
| Age 85+                                          | Age 85+                                                                          | End calendar year (5 months after) |
| Female                                           | Sex = female                                                                     | N/A                                |
| Practice IMD                                     | Index of multiple deprivation - GP practice area                                 | N/A                                |
| Months registered 1 yr prior                     | Months registered with GP prior 1-12 months                                      | Prior 1 - 12 months (inclusive)    |
| Months registered 2 yrs prior                    | Months registered with GP prior 13-24 months                                     | Prior 13 - 24 months (inclusive)   |
| <b>SUS inpatient variables</b>                   |                                                                                  |                                    |
| EM Adms prior 0-90 days                          | Number of emergency admissions - prior 1-90 days                                 | Prior 1 to 90 days (inclusive)     |
| EL Adms prior 0-90 days                          | Number of elective admissions - prior 1-90 days                                  | Prior 1 to 90 days (inclusive)     |
| Any attender prior 0-90 days                     | Any regular attendance - prior 1-90 days                                         | Prior 1 to 90 days (inclusive)     |
| EM Adms prior 91-180 days                        | Number of emergency admissions - prior 91-180 days                               | Prior 91 to 180 days (inclusive)   |
| EL Adms prior 91-180 days                        | Number of emergency admissions - prior 181-365 days                              | Prior 181 to 365 days (inclusive)  |
| Any day case prior 0-90 days                     | Any day case prior 1-90 days                                                     | Prior 1 to 90 days (inclusive)     |
| Any day case prior 91-180 days                   | Any day case prior 91-180 days                                                   | Prior 91 to 180 days (inclusive)   |
| Any day case prior 181-365 days                  | Any day case prior 181-365 days                                                  | Prior 181 to 365 days (inclusive)  |
| Any day case 2 yrs prior                         | Any day case prior 366-730 days                                                  | Prior 366 to 730 days (inclusive)  |
| Em Adms 2 yrs prior                              | Number of emergency admissions - prior 366-730 days                              | Prior 366 to 730 days (inclusive)  |
| DX Diabetes                                      | Any prim or sec diagnosis - Diabetes, prior 2 years                              | Prior 1 to 730 days (inclusive)    |
| DX MI                                            | Any prim or sec diagnosis - Myocardial infarction, prior 2 years                 | Prior 1 to 730 days (inclusive)    |
| DX CHF                                           | Any prim or sec diagnosis - Congestive heart failure, prior 2 years              | Prior 1 to 730 days (inclusive)    |
| DX PVD                                           | Any prim or sec diagnosis - Peripheral vascular disease, prior 2 years           | Prior 1 to 730 days (inclusive)    |
| DX CVD                                           | Any prim or sec diagnosis - Cerebral vascular disease, prior 2 years             | Prior 1 to 730 days (inclusive)    |
| DX Dementia                                      | Any prim or sec diagnosis - Dementia, prior 2 years                              | Prior 1 to 730 days (inclusive)    |
| CD CTD                                           | Any prim or sec diagnosis - Connective tissue disease, prior 2 years             | Prior 1 to 730 days (inclusive)    |
| DX Cancer                                        | Any prim or sec diagnosis - Malignant cancer, prior 2 years                      | Prior 1 to 730 days (inclusive)    |
| DX Diabetes with complications                   | Any prim or sec diagnosis - Diabetes with complications, prior 2 years           | Prior 1 to 730 days (inclusive)    |
| DX Renal Disease                                 | Any prim or sec diagnosis - Renal disease, prior 2 years                         | Prior 1 to 730 days (inclusive)    |
| Charlson Index                                   | Charlson Comorbidity Index, prior 2 years                                        | Prior 1 to 730 days (inclusive)    |
| DX Alcohol                                       | Any prim or sec diagnosis - Alcohol abuse, prior 2 years                         | Prior 1 to 730 days (inclusive)    |
| DX COPD                                          | Any prim or sec diagnosis - Chronic obstructive pulmonary disease, prior 2 years | Prior 1 to 730 days (inclusive)    |
| DX Mental                                        | Any prim or sec diagnosis - Mental illness, prior 2 years                        | Prior 1 to 730 days (inclusive)    |
| DX Asthma                                        | Any prim or sec diagnosis - Asthma, prior 2 years                                | Prior 1 to 730 days (inclusive)    |
| DX Cognitive Impairment                          | Any prim or sec diagnosis - Miscellaneous cognitive dysfunctions, prior 2 years  | Prior 1 to 730 days (inclusive)    |
| DX ACS Condition                                 | Any prim or sec diagnosis - ACS: Any ambulatory care sensitive condition         | Prior 1 to 730 days (inclusive)    |
| <b>SUS AE variables</b>                          |                                                                                  |                                    |
| AE visits prior 0-90 days                        | Number of A&E visits (any) prior 1-90 days                                       | Prior 1 to 90 days (inclusive)     |
| AE unplanned follow-up visits prior 0-90 days    | Number of A&E visits - unplanned follow-up prior 1-90 days                       | Prior 1 to 90 days (inclusive)     |
| AE X-ray prior 0-90 days                         | Number of A&E visits with X-ray prior 1-90 days                                  | Prior 1 to 90 days (inclusive)     |
| AE visits prior 91-180 days                      | Number of A&E visits (any) prior 91-180 days                                     | Prior 91 to 180 days (inclusive)   |
| AE unplanned follow-up visits prior 91-180 days  | Number of A&E visits - unplanned follow-up prior 91-180 days                     | Prior 91 to 180 days (inclusive)   |
| AE X-ray prior 91-180 days                       | Number of A&E visits with X-ray prior 91-180 days                                | Prior 91 to 180 days (inclusive)   |
| AE visits prior 181-365 days                     | Number of A&E visits (any) prior 181-365 days                                    | Prior 91 to 180 days (inclusive)   |
| AE unplanned follow-up visits prior 181-365 days | Number of A&E visits - unplanned follow-up prior 181-365 days                    | Prior 181 to 365 days (inclusive)  |
| AE X-ray prior 181-365 days                      | Number of A&E visits with X-ray prior 181-365 days                               | Prior 181 to 365 days (inclusive)  |
| AE visits 2 yrs prior                            | Number of A&E visits (any) prior 366-730 days                                    | Prior 366 to 730 days (inclusive)  |
| AE unplanned follow-up visits 2 yrs              | Number of A&E visits - unplanned follow-up prior 366 to 730 days                 | Prior 366 to 730 days (inclusive)  |

|                                                         |                                                                         |                                   |
|---------------------------------------------------------|-------------------------------------------------------------------------|-----------------------------------|
| prior                                                   | 366-730 days                                                            |                                   |
| AE X-ray 2yrs prior                                     | Number of A&E visits with X-ray prior 366-730 days                      | Prior 366 to 730 days (inclusive) |
| <b>SUS outpatient variables</b>                         |                                                                         |                                   |
| Outpatient specialty visits prior 0-90 days             | Number of outpatient visits (all) prior 1-90 days                       | Prior 1 to 90 days (inclusive)    |
| Outpatient specialty visits missed prior 0-90 days      | Number of outpatient visits missed prior 1-90 days                      | Prior 1 to 90 days (inclusive)    |
| Outpatient specialty visits prior 91-180 days           | Number of outpatient visits (all) prior 91-180 days                     | Prior 91 to 180 days (inclusive)  |
| Outpatient specialty visits missed prior 91-180 days    | Number of outpatient visits missed prior 91-180 days                    | Prior 91 to 180 days (inclusive)  |
| Outpatient specialty visits prior 181-365 days          | Number of outpatient visits (all) prior 181-365 days                    | Prior 181 to 365 days (inclusive) |
| Outpatient specialty visits missed prior 181-365 days   | Number of outpatient visits missed prior 181-365 days                   | Prior 181 to 365 days (inclusive) |
| Outpatient specialty visits 2 yrs prior                 | Number of outpatient visits (all) prior 365-730 days                    | Prior 366 to 730 days (inclusive) |
| Outpatient specialty visits missed 2 yrs prior          | Number of outpatient visits missed prior 365-730 days                   | Prior 366 to 730 days (inclusive) |
| <b>GP consultations data</b>                            |                                                                         |                                   |
| GP DX COPD                                              | Diagnosis of COPD, prior 2 years                                        | Prior 1 to 730 days (inclusive)   |
| GP - 1 long term condition                              | Chronic conditions - 1 in prior 2 years                                 | Prior 1 to 730 days (inclusive)   |
| GP - 2 or more long term conditions                     | Chronic conditions - 2 or more in prior 2 years                         | Prior 1 to 730 days (inclusive)   |
| GP - Glomerular filtration rate group 3 last 0-365 days | Glomerular Filtration Rate Group 3 in last year                         | Prior 1 to 365 days (inclusive)   |
| GP - 10+ unique drugs prescribed                        | 1-4 unique drugs - last 1 to 90 days                                    | Prior 1 to 90 days (inclusive)    |
| GP - 5-9 unique drugs prescribed                        | 5-9 unique drugs - last 1 to 90 days                                    | Prior 1 to 90 days (inclusive)    |
| GP - 0-4 unique drugs prescribed                        | 10+ unique drugs - last 1 to 90 days                                    | Prior 1 to 90 days (inclusive)    |
| GP - Psychoactive substance misuse disorder             | Psychoactive substance misuse disorder, prior 2 years                   | Prior 1 to 730 days (inclusive)   |
| GP - 7+ distinct disorders                              | 7+ distinct disease disorders recorded in prior 90 days                 | Prior 1 to 90 days (inclusive)    |
| GP - GP visits prior 0-3 months                         | Count of different BNF chapters of prescribed medicines, prior 2 years  | Prior 1 to 730 days (inclusive)   |
| GP - GP visits prior 4-6 months                         | Number of GP visits prior 1-3 months                                    | Prior 1 to 3 months (inclusive)   |
| GP - GP visits prior 7-12 months                        | Number of GP visits prior 13-24 months                                  | Prior 13 to 24 months (inclusive) |
| GP - GP visits 2yrs prior                               | Number of GP visits prior 4-6 months                                    | Prior 4 to 6 months (inclusive)   |
| GP - Increasing rate of GP visits during last 12 months | Number of GP visits prior 7-12 months                                   | Prior 7 to 12 months (inclusive)  |
| GP - Number of high risk BNFs                           | Substantial increase in GP visits last year                             |                                   |
| GP - Any high risk                                      | Number of BNF codes associated with emergency admissions, prior 2 years | Prior 1 to 730 days (inclusive)   |
| GP - Count of BNF chapters                              | Any BNF codes associated with emergency admissions, prior 2 years       | Prior 1 to 730 days (inclusive)   |
| GP - DX Dementia                                        | Diagnosis of Dementia, prior 2 years                                    | Prior 1 to 730 days (inclusive)   |
| GP - Exception reported from quality indicators         | QOF register exceptions, prior 2 years                                  | Prior 1 to 730 days (inclusive)   |
| GP - Health visitor or district nurse visit             | Any home/district visit, prior 2 years                                  | Prior 1 to 730 days (inclusive)   |
| GP - Record of IHD/angina                               | Diagnosis of IHD/angina, prior 2 years                                  | Prior 1 to 730 days (inclusive)   |
| GP - Nebuliser used                                     | Nebuliser prescribed, prior 2 years                                     | Prior 1 to 730 days (inclusive)   |
| GP - Salbutamol prescribed                              | Salbutamol prescribed, prior 2 years                                    | Prior 1 to 730 days (inclusive)   |
| GP - Warfarin prescribed                                | Warfarin prescribed, prior 2 years                                      | Prior 1 to 730 days (inclusive)   |
| GP - High blood pressure                                | High blood pressure Read code, prior 2 years                            | Prior 1 to 730 days (inclusive)   |
| GP - Smoker                                             | Smoking status, prior 2 years                                           | Prior 1 to 730 days (inclusive)   |
| GP - BMI 30+                                            | BMI greater than equal to 30, prior 2 years                             | Prior 1 to 730 days (inclusive)   |
| GP - HbA1c > 10                                         | HbA1c greater than 10, prior 2 years                                    | Prior 1 to 730 days (inclusive)   |
| GD - QOF ARTF                                           | QOF register: Atrial fibrillation                                       | Prior 1 to 730 days (inclusive)   |
| GP - QOF CKD                                            | QOF register: Stage 3 to 5 chronic kidney disease                       | Prior 1 to 730 days (inclusive)   |
| GP - QOF Depression                                     | QOF register: Depression                                                | Prior 1 to 730 days (inclusive)   |
| GP - Number of QOF DX categories 3+                     | QOF register: number of different registers, 3 or more                  | Prior 1 to 730 days (inclusive)   |
| GP - Number of phone contacts last 0-3 months           | Number of GP telephone consults prior 1-3 months                        | Prior 1 to 3 months (inclusive)   |

**STROBE Statement— checklist of items that should be included in reports of observational studies**

Please fill out the page numbers on this form and upload the file as a supplemental file when you submit your revision

Manuscript Number \_\_\_\_\_

Indicate page number ↓  
 (Or n/a if not applicable)

|                              | Item No | Recommendation                                                                                                                                                                                                                                                                                                                                                                                                                                                         |  |
|------------------------------|---------|------------------------------------------------------------------------------------------------------------------------------------------------------------------------------------------------------------------------------------------------------------------------------------------------------------------------------------------------------------------------------------------------------------------------------------------------------------------------|--|
| Title and abstract           | 1       | (a) Indicate the study's design with a commonly used term in the title or the abstract                                                                                                                                                                                                                                                                                                                                                                                 |  |
|                              |         | (b) Provide in the abstract an informative and balanced summary of what was done and what was found                                                                                                                                                                                                                                                                                                                                                                    |  |
| <b>Introduction</b>          |         |                                                                                                                                                                                                                                                                                                                                                                                                                                                                        |  |
| Background/rationale         | 2       | Explain the scientific background and rationale for the investigation being reported                                                                                                                                                                                                                                                                                                                                                                                   |  |
| Objectives                   | 3       | State specific objectives, including any prespecified hypotheses                                                                                                                                                                                                                                                                                                                                                                                                       |  |
| <b>Methods</b>               |         |                                                                                                                                                                                                                                                                                                                                                                                                                                                                        |  |
| Study design                 | 4       | Present key elements of study design early in the paper                                                                                                                                                                                                                                                                                                                                                                                                                |  |
| Setting                      | 5       | Describe the setting, locations, and relevant dates, including periods of recruitment, exposure, follow-up, and data collection                                                                                                                                                                                                                                                                                                                                        |  |
| Participants                 | 6       | (a) <i>Cohort study</i> —Give the eligibility criteria, and the sources and methods of selection of participants. Describe methods of follow-up<br><i>Case-control study</i> —Give the eligibility criteria, and the sources and methods of case ascertainment and control selection. Give the rationale for the choice of cases and controls<br><i>Cross-sectional study</i> —Give the eligibility criteria, and the sources and methods of selection of participants |  |
|                              |         | (b) <i>Cohort study</i> —For matched studies, give matching criteria and number of exposed and unexposed<br><i>Case-control study</i> —For matched studies, give matching criteria and the number of controls per case                                                                                                                                                                                                                                                 |  |
| Variables                    | 7       | Clearly define all outcomes, exposures, predictors, potential confounders, and effect modifiers. Give diagnostic criteria, if applicable                                                                                                                                                                                                                                                                                                                               |  |
| Data sources/<br>measurement | 8*      | For each variable of interest, give sources of data and details of methods of assessment (measurement). Describe comparability of assessment methods if there is more than one group                                                                                                                                                                                                                                                                                   |  |
| Bias                         | 9       | Describe any efforts to address potential sources of bias                                                                                                                                                                                                                                                                                                                                                                                                              |  |
| Study size                   | 10      | Explain how the study size was arrived at                                                                                                                                                                                                                                                                                                                                                                                                                              |  |
| Quantitative variables       | 11      | Explain how quantitative variables were handled in the analyses. If applicable, describe which groupings were chosen and why                                                                                                                                                                                                                                                                                                                                           |  |
| Statistical methods          | 12      | (a) Describe all statistical methods, including those used to control for confounding                                                                                                                                                                                                                                                                                                                                                                                  |  |
|                              |         | (b) Describe any methods used to examine subgroups and interactions                                                                                                                                                                                                                                                                                                                                                                                                    |  |
|                              |         | (c) Explain how missing data were addressed                                                                                                                                                                                                                                                                                                                                                                                                                            |  |
|                              |         | (d) <i>Cohort study</i> —If applicable, explain how loss to follow-up was addressed<br><i>Case-control study</i> —If applicable, explain how matching of cases and controls was addressed<br><i>Cross-sectional study</i> —If applicable, describe analytical methods taking account of sampling strategy                                                                                                                                                              |  |
|                              |         | (e) Describe any sensitivity analyses                                                                                                                                                                                                                                                                                                                                                                                                                                  |  |
| <b>Results</b>               |         |                                                                                                                                                                                                                                                                                                                                                                                                                                                                        |  |
| Participants                 | 13*     | (a) Report numbers of individuals at each stage of study—eg numbers potentially eligible, examined for eligibility, confirmed eligible, included in the study, completing follow-up, and analysed                                                                                                                                                                                                                                                                      |  |
|                              |         | (b) Give reasons for non-participation at each stage                                                                                                                                                                                                                                                                                                                                                                                                                   |  |
|                              |         | (c) Consider use of a flow diagram                                                                                                                                                                                                                                                                                                                                                                                                                                     |  |
| Descriptive data             | 14*     | (a) Give characteristics of study participants (eg demographic, clinical, social) and information on exposures and potential confounders                                                                                                                                                                                                                                                                                                                               |  |
|                              |         | (b) Indicate number of participants with missing data for each variable of interest                                                                                                                                                                                                                                                                                                                                                                                    |  |
|                              |         | (c) <i>Cohort study</i> —Summarise follow-up time (eg, average and total amount)                                                                                                                                                                                                                                                                                                                                                                                       |  |
| Outcome data                 | 15*     | <i>Cohort study</i> —Report numbers of outcome events or summary measures over time                                                                                                                                                                                                                                                                                                                                                                                    |  |
|                              |         | <i>Case-control study</i> —Report numbers in each exposure category, or summary measures of exposure                                                                                                                                                                                                                                                                                                                                                                   |  |
|                              |         | <i>Cross-sectional study</i> —Report numbers of outcome events or summary measures                                                                                                                                                                                                                                                                                                                                                                                     |  |
| Main results                 | 16      | (a) Give unadjusted estimates and, if applicable, confounder-adjusted estimates and their precision (eg, 95%                                                                                                                                                                                                                                                                                                                                                           |  |

|                          |    |                                                                                                                                                                            |  |
|--------------------------|----|----------------------------------------------------------------------------------------------------------------------------------------------------------------------------|--|
|                          |    | confidence interval). Make clear which confounders were adjusted for and why they were included                                                                            |  |
|                          |    | (b) Report category boundaries when continuous variables were categorized                                                                                                  |  |
|                          |    | (c) If relevant, consider translating estimates of relative risk into absolute risk for a meaningful time period                                                           |  |
| Other analyses           | 17 | Report other analyses done—eg analyses of subgroups and interactions, and sensitivity analyses                                                                             |  |
| <b>Discussion</b>        |    |                                                                                                                                                                            |  |
| Key results              | 18 | Summarise key results with reference to study objectives                                                                                                                   |  |
| Limitations              | 19 | Discuss limitations of the study, taking into account sources of potential bias or imprecision. Discuss both direction and magnitude of any potential bias                 |  |
| Interpretation           | 20 | Give a cautious overall interpretation of results considering objectives, limitations, multiplicity of analyses, results from similar studies, and other relevant evidence |  |
| Generalisability         | 21 | Discuss the generalisability (external validity) of the study results                                                                                                      |  |
| <b>Other information</b> |    |                                                                                                                                                                            |  |
| Funding                  | 22 | Give the source of funding and the role of the funders for the present study and, if applicable, for the original study on which the present article is based              |  |

\*Give information separately for cases and controls in case-control studies and, if applicable, for exposed and unexposed groups in cohort and cross-sectional studies.

**Note:** An Explanation and Elaboration article discusses each checklist item and gives methodological background and published examples of transparent reporting. The STROBE checklist is best used in conjunction with this article (freely available on the Web sites of PLoS Medicine at <http://www.plosmedicine.org/>, Annals of Internal Medicine at <http://www.annals.org/>, and Epidemiology at <http://www.epidem.com/>). Information on the STROBE Initiative is available at [www.strobe-statement.org](http://www.strobe-statement.org).

1  
2  
3  
4  
5  
6  
7  
8  
9  
10  
11  
12  
13  
14  
15  
16  
17  
18  
19  
20  
21  
22  
23  
24  
25  
26  
27  
28  
29  
30  
31  
32  
33  
34  
35  
36  
37  
38  
39  
40  
41  
42  
43  
44  
45  
46  
47  
48  
49  
50  
51  
52  
53  
54  
55  
56  
57  
58  
59  
60
