# Supplementary material for: Choosing a model to predict hospital admission: an observational study of new variants of predictive models for case finding
Source: HighWire-hosted journal article supplement (doi:10.1136/bmjopen-2013-003352), 2013-08-01
Supplement: bmjopen-2013-003352supp_appendix.pdf [file bmjopen-2013-003352supp_appendix.pdf]

**Appendix A.** PPV and sensitivity IPAEOP and IPAEOPGP models. Individual site runs.

| Risk Score Threshold | IP+AE+OP Data |             |          |             |       |             |         |             |           |             |
|----------------------|---------------|-------------|----------|-------------|-------|-------------|---------|-------------|-----------|-------------|
|                      | Newham        |             | Cornwall |             | Kent  |             | Croydon |             | Redbridge |             |
|                      | PPV           | Sensitivity | PPV      | Sensitivity | PPV   | Sensitivity | PPV     | Sensitivity | PPV       | Sensitivity |
| 1                    | 0.049         | 1.000       | 0.061    | 1.000       | 0.052 | 1.000       | 0.046   | 1.000       | 0.047     | 1.000       |
| 10                   | 0.236         | 0.361       | 0.216    | 0.391       | 0.213 | 0.339       | 0.241   | 0.378       | 0.238     | 0.425       |
| 20                   | 0.368         | 0.201       | 0.328    | 0.188       | 0.326 | 0.158       | 0.377   | 0.210       | 0.357     | 0.236       |
| 30                   | 0.450         | 0.136       | 0.406    | 0.109       | 0.401 | 0.094       | 0.444   | 0.142       | 0.420     | 0.149       |
| 40                   | 0.506         | 0.098       | 0.477    | 0.072       | 0.457 | 0.062       | 0.486   | 0.100       | 0.475     | 0.098       |
| 50                   | 0.552         | 0.071       | 0.520    | 0.047       | 0.513 | 0.043       | 0.528   | 0.073       | 0.512     | 0.067       |
| 60                   | 0.585         | 0.052       | 0.560    | 0.030       | 0.569 | 0.031       | 0.580   | 0.055       | 0.532     | 0.044       |
| 70                   | 0.632         | 0.037       | 0.622    | 0.021       | 0.618 | 0.022       | 0.610   | 0.040       | 0.555     | 0.028       |
| 80                   | 0.678         | 0.024       | 0.655    | 0.013       | 0.673 | 0.014       | 0.659   | 0.028       | 0.571     | 0.016       |
| 90                   | 0.717         | 0.013       | 0.692    | 0.007       | 0.724 | 0.008       | 0.710   | 0.016       | 0.617     | 0.008       |
| Top 1%               | 0.501         | 0.102       | 0.470    | 0.077       | 0.417 | 0.080       | 0.482   | 0.106       | 0.474     | 0.101       |
| Top 5%               | 0.287         | 0.291       | 0.292    | 0.240       | 0.259 | 0.249       | 0.290   | 0.318       | 0.296     | 0.316       |

| Risk Score Threshold | IP+AE+OP+GP Data |             |          |             |       |             |         |             |           |             |
|----------------------|------------------|-------------|----------|-------------|-------|-------------|---------|-------------|-----------|-------------|
|                      | Newham           |             | Cornwall |             | Kent  |             | Croydon |             | Redbridge |             |
|                      | PPV              | Sensitivity | PPV      | Sensitivity | PPV   | Sensitivity | PPV     | Sensitivity | PPV       | Sensitivity |
| 1                    | 0.049            | 1.000       | 0.061    | 1.000       | 0.052 | 1.000       | 0.046   | 1.000       | 0.047     | 1.000       |
| 10                   | 0.228            | 0.410       | 0.213    | 0.439       | 0.210 | 0.392       | 0.237   | 0.452       | 0.237     | 0.457       |
| 20                   | 0.360            | 0.235       | 0.323    | 0.232       | 0.314 | 0.194       | 0.358   | 0.267       | 0.348     | 0.272       |
| 30                   | 0.439            | 0.152       | 0.410    | 0.136       | 0.397 | 0.113       | 0.442   | 0.174       | 0.423     | 0.172       |
| 40                   | 0.499            | 0.103       | 0.481    | 0.084       | 0.459 | 0.072       | 0.494   | 0.114       | 0.482     | 0.113       |
| 50                   | 0.566            | 0.074       | 0.545    | 0.053       | 0.521 | 0.048       | 0.550   | 0.079       | 0.522     | 0.073       |
| 60                   | 0.606            | 0.052       | 0.602    | 0.033       | 0.580 | 0.032       | 0.589   | 0.052       | 0.563     | 0.047       |
| 70                   | 0.657            | 0.036       | 0.659    | 0.021       | 0.644 | 0.021       | 0.643   | 0.035       | 0.616     | 0.030       |
| 80                   | 0.723            | 0.021       | 0.714    | 0.013       | 0.694 | 0.013       | 0.694   | 0.021       | 0.651     | 0.018       |
| 90                   | 0.766            | 0.012       | 0.745    | 0.006       | 0.752 | 0.007       | 0.735   | 0.011       | 0.655     | 0.007       |
| Top 1%               | 0.504            | 0.102       | 0.490    | 0.081       | 0.438 | 0.084       | 0.502   | 0.110       | 0.487     | 0.104       |
| Top 5%               | 0.296            | 0.300       | 0.309    | 0.254       | 0.272 | 0.262       | 0.307   | 0.337       | 0.312     | 0.333       |

## Appendix B Regression coefficients. IPAEOP and IPAEOPGP models. Individual site runs.

|                                                       | IP+AE+OP Data |        |        |        |        | IP+AE+OP+GP Data |        |        |        |        |
|-------------------------------------------------------|---------------|--------|--------|--------|--------|------------------|--------|--------|--------|--------|
|                                                       | NH            | CW     | KT     | CR     | RB     | NH               | CW     | KT     | CR     | RB     |
| Age                                                   | 0.015         | 0.003  | 0.009  | 0.010  | 0.019  | 0.001            | -0.004 | 0.002  | 0.001  | 0.009  |
| Age 65-74                                             | 0.280         | 0.409  | 0.295  | 0.380  | 0.261  | 0.236            | 0.276  | 0.203  | 0.244  | 0.245  |
| Age 75-84                                             | 0.738         | 0.905  | 0.731  | 0.847  | 0.734  | 0.721            | 0.672  | 0.605  | 0.708  | 0.749  |
| Age 85+                                               | 1.076         | 1.483  | 1.226  | 1.178  | 1.109  | 1.150            | 1.206  | 1.086  | 1.187  | 1.213  |
| Female                                                | 0.239         | 0.002  | 0.044  | 0.178  | 0.058  | 0.114            | -0.095 | -0.075 | -0.014 | -0.030 |
| Practice IMD                                          | 0.013         | 0.003  | 0.016  | 0.018  | 0.012  | 0.008            | 0.004  | 0.017  | 0.010  | 0.015  |
| Months registered 1 yr prior                          | 0.014         | -0.011 | -0.005 | -0.018 | -0.013 | 0.011            | -0.011 | -0.003 | -0.010 | -0.006 |
| Months registered 2 yrs prior                         | -0.022        | -0.019 | -0.016 | -0.007 | -0.023 | -0.021           | -0.024 | -0.019 | -0.011 | -0.021 |
| EM Adms prior 0-90 days                               | 0.382         | 0.471  | 0.321  | 0.310  | 0.282  | 0.367            | 0.420  | 0.283  | 0.269  | 0.259  |
| EL Adms prior 0-90 days                               | 0.045         | 0.216  | 0.155  | 0.153  | 0.148  | 0.033            | 0.159  | 0.074  | 0.097  | 0.069  |
| Any attender prior 0-90 days                          | 0.115         | 0.027  | 0.001  | 0.041  | 0.073  | 0.135            | 0.026  | 0.010  | 0.042  | 0.064  |
| Any day case prior 0-90 days                          | 0.094         | 0.234  | 0.110  | 0.111  | 0.251  | 0.037            | 0.173  | 0.039  | -0.019 | 0.130  |
| EM Adms prior 91-180 days                             | 0.215         | 0.310  | 0.351  | 0.282  | 0.185  | 0.217            | 0.262  | 0.297  | 0.243  | 0.160  |
| EL Adms prior 91-180 days                             | 0.321         | 0.150  | 0.062  | 0.204  | 0.081  | 0.283            | 0.128  | 0.027  | 0.118  | 0.024  |
| EM Adms prior 181-365 days                            | 0.113         | 0.345  | 0.350  | 0.248  | 0.146  | 0.124            | 0.289  | 0.292  | 0.227  | 0.129  |
| EL Adms prior 181-365 days                            | 0.097         | 0.120  | 0.104  | 0.118  | 0.170  | 0.072            | 0.079  | 0.060  | 0.035  | 0.108  |
| Em Adms 2 yrs prior                                   | 0.102         | 0.269  | 0.307  | 0.181  | 0.143  | 0.116            | 0.216  | 0.250  | 0.178  | 0.149  |
| Any day case 2 yrs prior                              | 0.096         | 0.157  | 0.186  | 0.151  | 0.179  | 0.058            | 0.092  | 0.112  | 0.005  | 0.103  |
| DX MI                                                 | -0.108        | 0.097  | -0.105 | -0.004 | 0.376  | -0.197           | -0.003 | -0.163 | -0.111 | 0.228  |
| DX CHF                                                | -0.348        | -0.070 | -0.246 | -0.069 | -0.337 | -0.370           | -0.178 | -0.269 | -0.110 | -0.216 |
| DX CVD                                                | 0.296         | 0.227  | 0.033  | 0.037  | -0.040 | 0.269            | 0.166  | -0.001 | -0.099 | -0.061 |
| CD CTD                                                | 0.030         | -0.024 | 0.101  | -0.380 | -0.029 | 0.071            | -0.192 | -0.010 | -0.427 | -0.039 |
| DX PVD                                                | -0.245        | 0.124  | 0.099  | -0.100 | 0.021  | -0.253           | 0.048  | 0.026  | -0.096 | 0.003  |
| DX Asthma                                             | 0.082         | 0.143  | 0.184  | 0.099  | 0.192  | -0.114           | -0.107 | -0.023 | -0.081 | 0.028  |
| DX COPD                                               | 0.204         | 0.251  | 0.277  | 0.193  | 0.123  | -0.169           | -0.139 | -0.036 | -0.330 | -0.269 |
| DX Diabetes                                           | 0.240         | 0.303  | 0.285  | 0.253  | 0.276  | -0.046           | -0.052 | -0.016 | -0.124 | 0.011  |
| DX Diabetes with complications                        | 0.059         | -0.221 | 0.062  | -0.014 | 0.334  | 0.062            | -0.176 | 0.095  | 0.004  | 0.262  |
| DX Renal Disease                                      | 0.408         | 0.022  | 0.085  | 0.128  | 0.199  | 0.356            | 0.005  | 0.073  | 0.063  | 0.120  |
| DX Cancer                                             | -0.165        | -0.019 | -0.062 | -0.308 | 0.041  | 0.041            | 0.098  | -0.010 | -0.207 | 0.034  |
| DX Mental                                             | 0.498         | 0.316  | 0.363  | 0.484  | 0.077  | 0.340            | 0.131  | 0.111  | 0.266  | -0.061 |
| DX Alcohol                                            | 0.569         | 0.684  | 0.578  | 0.673  | 0.974  | 0.281            | 0.530  | 0.357  | 0.409  | 0.754  |
| DX Dementia                                           | -0.548        | -0.589 | -0.551 | -0.402 | -0.596 | -0.530           | -0.486 | -0.440 | -0.669 | -0.641 |
| DX Cognitive Impairment                               | -0.117        | 0.016  | 0.025  | 0.110  | 0.187  | -0.075           | 0.046  | 0.031  | 0.088  | 0.152  |
| DX ACS Condition                                      | 0.364         | 0.270  | 0.239  | 0.267  | 0.306  | 0.269            | 0.161  | 0.134  | 0.114  | 0.224  |
| Charlson Index                                        | 0.055         | 0.063  | 0.060  | 0.101  | 0.025  | 0.048            | 0.062  | 0.037  | 0.086  | 0.029  |
| AE visits prior 0-90 days                             | 0.236         | 0.267  | 0.355  | 0.309  | 0.359  | 0.179            | 0.230  | 0.265  | 0.199  | 0.260  |
| AE unplanned follow-up visits prior 0-90 days         | -0.094        | -0.583 | -0.533 | -0.874 | -0.383 | -0.107           | -0.566 | -0.452 | -0.703 | -0.315 |
| AE X-ray prior 0-90 days                              | 0.348         | 0.437  | 0.058  | 0.104  | 0.367  | 0.303            | 0.382  | 0.027  | 0.040  | 0.317  |
| AE visits prior 91-180 days                           | 0.265         | 0.262  | 0.220  | 0.225  | 0.277  | 0.197            | 0.225  | 0.165  | 0.142  | 0.210  |
| AE unplanned follow-up visits prior 91-180 days       | -0.023        | -0.560 | -0.229 | -0.296 | -0.298 | -0.026           | -0.543 | -0.177 | -0.225 | -0.286 |
| AE X-ray prior 91-180 days                            | 0.227         | 0.117  | 0.120  | 0.346  | -0.064 | 0.210            | 0.015  | 0.101  | 0.237  | 0.010  |
| AE visits prior 181-365 days                          | 0.264         | 0.205  | 0.135  | 0.171  | 0.181  | 0.216            | 0.174  | 0.090  | 0.115  | 0.138  |
| AE unplanned follow-up visits prior 181-365 days      | -0.251        | -0.490 | -0.184 | -0.261 | -0.203 | -0.214           | -0.449 | -0.131 | -0.175 | -0.221 |
| AE X-ray prior 181-365 days                           | 0.262         | -0.040 | 0.281  | 0.324  | 0.110  | 0.225            | 0.085  | 0.251  | 0.244  | 0.072  |
| AE visits 2 yrs prior                                 | 0.211         | 0.159  | 0.154  | 0.140  | 0.160  | 0.170            | 0.138  | 0.114  | 0.077  | 0.121  |
| AE unplanned follow-up visits 2 yrs prior             | -0.307        | -0.352 | -0.239 | -0.433 | -0.339 | -0.228           | -0.317 | -0.178 | -0.262 | -0.288 |
| AE X-ray 2yrs prior                                   | 0.083         | 0.231  | 0.100  | 0.128  | 0.179  | 0.063            | 0.390  | 0.082  | 0.069  | 0.152  |
| Outpatient specialty visits prior 0-90 days           | 0.046         | 0.055  | 0.091  | 0.061  | 0.059  | 0.025            | 0.033  | 0.047  | 0.030  | 0.027  |
| Outpatient specialty visits missed prior 0-90 days    | 0.155         | 0.182  | 0.250  |        | 0.146  | 0.108            | 0.118  | 0.171  |        | 0.097  |
| Outpatient specialty visits prior 91-180 days         | 0.030         | 0.013  | 0.023  | 0.034  | 0.029  | 0.007            | 0.003  | -0.004 | 0.015  | 0.011  |
| Outpatient specialty visits missed prior 91-180 days  | 0.113         | 0.239  | 0.168  |        | 0.193  | 0.087            | 0.184  | 0.113  |        | 0.159  |
| Outpatient specialty visits prior 181-365 days        | 0.016         | 0.010  | -0.005 | 0.019  | 0.031  | -0.003           | 0.001  | -0.024 | 0.003  | 0.018  |
| Outpatient specialty visits missed prior 181-365 days | 0.128         | 0.164  | 0.075  |        | 0.140  | 0.086            | 0.095  | 0.036  |        | 0.122  |
| Outpatient specialty visits 2 yrs prior               | 0.019         | 0.030  | 0.014  | 0.028  | 0.019  | 0.008            | 0.014  | -0.009 | 0.011  | 0.021  |
| Outpatient specialty visits missed 2 yrs prior        | 0.142         | 0.162  | 0.140  | 0.190  | 0.082  | 0.097            | 0.090  | 0.085  | 0.129  | 0.057  |
| GP DX COPD                                            |               |        |        |        |        | 0.218            | 0.174  | 0.112  | 0.287  | 0.295  |

|                                                         |        |        |        |        |        |
|---------------------------------------------------------|--------|--------|--------|--------|--------|
| GP - 1 long term condition                              | 0.131  | 0.025  | 0.017  | 0.106  | 0.192  |
| GP - 2 or more long term conditions                     | 0.166  | 0.109  | 0.038  | 0.070  | 0.182  |
| GP - Glomerular filtration rate group 3 last 0-365 days | -0.075 | 0.092  | -0.017 |        | 0.050  |
| GP - 10+ unique drugs prescribed                        | 0.342  | 0.570  | 0.166  | 2.741  | 1.949  |
| GP - 5-9 unique drugs prescribed                        | 0.424  | 0.444  | 0.164  | 2.804  | 1.953  |
| GP - 0-4 unique drugs prescribed                        | 0.328  | 0.254  | 0.114  | 2.559  | 1.809  |
| GP - Psychoactive substance misuse disorder             | 0.388  | 0.323  | 0.583  | 0.431  | 0.810  |
| GP - 7+ distinct disorders                              | -0.049 | 0.057  | 0.017  | -0.163 | -0.062 |
| GP - GP visits prior 0-3 months                         | -0.001 | 0.008  | 0.022  | 0.021  | 0.042  |
| GP - GP visits prior 4-6 months                         | 0.015  | 0.004  | 0.012  | 0.009  | 0.019  |
| GP - GP visits prior 7-12 months                        | 0.005  | 0.003  | 0.007  | 0.000  | 0.008  |
| GP - GP visits 2yrs prior                               | 0.000  | 0.002  | 0.004  | 0.006  | 0.002  |
| GP - Increasing rate of GP visits during last 12 months | 0.184  | 0.087  | 0.126  | 0.207  | 0.094  |
| GP - Number of high risk BNFs                           | 0.063  | 0.006  | -0.036 | -0.026 | -0.075 |
| GP - Any high risk                                      | 0.219  | 0.202  | 0.241  | 0.324  | 0.249  |
| GP - Count of BNF chapters                              | 0.066  | 0.053  | 0.059  | 0.066  | -0.024 |
| GP - DX Dementia                                        | 0.421  | 0.266  | 0.296  | 0.471  | 0.437  |
| GP - Exception reported from quality indicators         | 0.157  | 0.108  | 0.111  | 0.118  | 0.132  |
| GP - Health visitor or district nurse visit             | 0.278  | 0.244  | 0.199  | 0.168  | 0.184  |
| GP - Record of IHD/angina                               | 0.069  | -0.048 | 0.110  | -0.062 | 0.081  |
| GP - Nebuliser used                                     | 0.113  | 0.315  | 0.207  | 0.191  | 0.448  |
| GP - Salbutamol prescribed                              | 0.021  | 0.017  | 0.074  | 0.000  | -0.011 |
| GP - Warfarin prescribed                                | -0.041 | 0.031  | -0.026 | -0.100 | -0.244 |
| GP - High blood pressure                                | -0.040 | -0.001 | -0.013 | -0.048 | -0.087 |
| GP - Smoker                                             | 0.298  | 0.231  | 0.248  | 0.240  | 0.220  |
| GP - BMI 30+                                            | 0.050  | 0.002  | 0.085  | 0.046  | 0.199  |
| GP - HbA1c > 10                                         | 0.236  | 0.270  | 0.210  | 0.362  | 0.354  |
| GD - QOF ARTF                                           | 0.176  | 0.064  | 0.095  | -0.047 | 0.143  |
| GP - QOF CKD                                            | 0.206  | -0.003 | -0.037 | 0.091  | 0.210  |
| GP - QOF Depression                                     | 0.069  | 0.248  | 0.183  | 0.133  | 0.186  |
| GP - Number of QOF DX categories 3+                     | 0.003  | -0.023 | -0.072 | -0.135 | -0.009 |
| GP - Number of phone contacts last 0-3 months           | -0.004 | 0.046  | 0.004  | -0.005 | -0.004 |
| Constant                                                | -4.665 | -3.262 | -3.987 | -4.363 | -4.368 |
|                                                         | -4.381 | -3.275 | -4.069 | -6.497 | -5.939 |

## Appendix C Regression significance levels. IPAEOP and IPAEOPGP models. Individual site runs.

|                                                       | IP+AE+OP Data |       |       |       |       | IP+AE+OP+GP Data |       |       |       |       |
|-------------------------------------------------------|---------------|-------|-------|-------|-------|------------------|-------|-------|-------|-------|
|                                                       | NH            | CW    | KT    | CR    | RB    | NH               | CW    | KT    | CR    | RB    |
| Age                                                   | 0.000         | 0.000 | 0.000 | 0.000 | 0.000 | 0.344            | 0.000 | 0.001 | 0.158 | 0.000 |
| Age 65-74                                             | 0.000         | 0.000 | 0.000 | 0.000 | 0.000 | 0.000            | 0.000 | 0.000 | 0.000 | 0.000 |
| Age 75-84                                             | 0.000         | 0.000 | 0.000 | 0.000 | 0.000 | 0.000            | 0.000 | 0.000 | 0.000 | 0.000 |
| Age 85+                                               | 0.000         | 0.000 | 0.000 | 0.000 | 0.000 | 0.000            | 0.000 | 0.000 | 0.000 | 0.000 |
| Female                                                | 0.007         | 0.897 | 0.000 | 0.001 | 0.125 | 0.000            | 0.000 | 0.000 | 0.466 | 0.165 |
| Practice IMD                                          | 0.008         | 0.036 | 0.000 | 0.000 | 0.000 | 0.015            | 0.010 | 0.000 | 0.000 | 0.000 |
| Months registered 1 yr prior                          | 0.002         | 0.006 | 0.085 | 0.247 | 0.047 | 0.009            | 0.011 | 0.387 | 0.026 | 0.255 |
| Months registered 2 yrs prior                         | 0.001         | 0.014 | 0.006 | 0.232 | 0.276 | 0.009            | 0.003 | 0.001 | 0.211 | 0.025 |
| EM Adms prior 0-90 days                               | 0.000         | 0.000 | 0.000 | 0.000 | 0.000 | 0.000            | 0.000 | 0.000 | 0.000 | 0.000 |
| EL Adms prior 0-90 days                               | 0.664         | 0.000 | 0.000 | 0.029 | 0.081 | 0.714            | 0.000 | 0.070 | 0.102 | 0.373 |
| Any attender prior 0-90 days                          | 0.002         | 0.000 | 0.955 | 0.006 | 0.004 | 0.001            | 0.000 | 0.489 | 0.005 | 0.008 |
| Any day case prior 0-90 days                          | 0.769         | 0.000 | 0.001 | 0.682 | 0.001 | 0.561            | 0.000 | 0.233 | 0.699 | 0.015 |
| EM Adms prior 91-180 days                             | 0.000         | 0.000 | 0.000 | 0.000 | 0.000 | 0.000            | 0.000 | 0.000 | 0.000 | 0.002 |
| EL Adms prior 91-180 days                             | 0.000         | 0.000 | 0.068 | 0.022 | 0.528 | 0.000            | 0.001 | 0.437 | 0.016 | 0.680 |
| EM Adms prior 181-365 days                            | 0.000         | 0.000 | 0.000 | 0.000 | 0.000 | 0.001            | 0.000 | 0.000 | 0.000 | 0.000 |
| EL Adms prior 181-365 days                            | 0.548         | 0.000 | 0.000 | 0.757 | 0.019 | 0.167            | 0.009 | 0.030 | 0.372 | 0.014 |
| Em Adms 2 yrs prior                                   | 0.000         | 0.000 | 0.000 | 0.000 | 0.000 | 0.000            | 0.000 | 0.000 | 0.000 | 0.000 |
| Any day case 2 yrs prior                              | 0.877         | 0.000 | 0.000 | 0.536 | 0.035 | 0.177            | 0.000 | 0.000 | 0.864 | 0.005 |
| DX MI                                                 | 0.366         | 0.134 | 0.049 | 0.611 | 0.000 | 0.076            | 0.966 | 0.002 | 0.216 | 0.017 |
| DX CHF                                                | 0.024         | 0.253 | 0.000 | 0.448 | 0.008 | 0.001            | 0.005 | 0.000 | 0.194 | 0.026 |
| DX CVD                                                | 0.015         | 0.000 | 0.446 | 0.610 | 0.571 | 0.013            | 0.002 | 0.977 | 0.179 | 0.504 |
| CD CTD                                                | 0.263         | 0.756 | 0.150 | 0.010 | 0.759 | 0.645            | 0.013 | 0.891 | 0.000 | 0.766 |
| DX PVD                                                | 0.230         | 0.061 | 0.097 | 0.567 | 0.665 | 0.079            | 0.462 | 0.661 | 0.270 | 0.982 |
| DX Asthma                                             | 0.351         | 0.002 | 0.000 | 0.241 | 0.015 | 0.135            | 0.024 | 0.580 | 0.184 | 0.698 |
| DX COPD                                               | 0.005         | 0.000 | 0.000 | 0.009 | 0.098 | 0.098            | 0.021 | 0.483 | 0.002 | 0.041 |
| DX Diabetes                                           | 0.000         | 0.000 | 0.000 | 0.000 | 0.000 | 0.444            | 0.227 | 0.649 | 0.016 | 0.845 |
| DX Diabetes with complications                        | 0.478         | 0.025 | 0.540 | 0.363 | 0.013 | 0.674            | 0.073 | 0.347 | 0.973 | 0.083 |
| DX Renal Disease                                      | 0.000         | 0.731 | 0.142 | 0.068 | 0.025 | 0.001            | 0.942 | 0.208 | 0.405 | 0.210 |
| DX Cancer                                             | 0.753         | 0.751 | 0.271 | 0.001 | 0.421 | 0.727            | 0.104 | 0.862 | 0.009 | 0.721 |
| DX Mental                                             | 0.000         | 0.000 | 0.000 | 0.000 | 0.370 | 0.000            | 0.005 | 0.008 | 0.000 | 0.447 |
| DX Alcohol                                            | 0.000         | 0.000 | 0.000 | 0.000 | 0.000 | 0.029            | 0.000 | 0.000 | 0.000 | 0.000 |
| DX Dementia                                           | 0.005         | 0.000 | 0.000 | 0.000 | 0.000 | 0.004            | 0.000 | 0.000 | 0.000 | 0.000 |
| DX Cognitive Impairment                               | 0.430         | 0.804 | 0.620 | 0.191 | 0.026 | 0.456            | 0.474 | 0.534 | 0.199 | 0.080 |
| DX ACS Condition                                      | 0.000         | 0.000 | 0.000 | 0.000 | 0.000 | 0.000            | 0.000 | 0.000 | 0.001 | 0.000 |
| Charlson Index                                        | 0.012         | 0.000 | 0.000 | 0.000 | 0.212 | 0.042            | 0.000 | 0.006 | 0.000 | 0.160 |
| AE visits prior 0-90 days                             | 0.000         | 0.000 | 0.000 | 0.000 | 0.000 | 0.000            | 0.000 | 0.000 | 0.000 | 0.000 |
| AE unplanned follow-up visits prior 0-90 days         | 0.895         | 0.001 | 0.000 | 0.000 | 0.133 | 0.654            | 0.001 | 0.000 | 0.000 | 0.121 |
| AE X-ray prior 0-90 days                              | 0.002         | 0.000 | 0.301 | 0.374 | 0.052 | 0.004            | 0.002 | 0.636 | 0.662 | 0.035 |
| AE visits prior 91-180 days                           | 0.000         | 0.000 | 0.000 | 0.000 | 0.000 | 0.000            | 0.000 | 0.000 | 0.000 | 0.000 |
| AE unplanned follow-up visits prior 91-180 days       | 0.836         | 0.000 | 0.000 | 0.149 | 0.130 | 0.899            | 0.000 | 0.005 | 0.214 | 0.055 |
| AE X-ray prior 91-180 days                            | 0.070         | 0.582 | 0.045 | 0.002 | 0.672 | 0.062            | 0.946 | 0.090 | 0.009 | 0.985 |
| AE visits prior 181-365 days                          | 0.000         | 0.000 | 0.000 | 0.000 | 0.000 | 0.000            | 0.000 | 0.000 | 0.000 | 0.000 |
| AE unplanned follow-up visits prior 181-365 days      | 0.182         | 0.000 | 0.001 | 0.122 | 0.124 | 0.098            | 0.001 | 0.013 | 0.127 | 0.041 |
| AE X-ray prior 181-365 days                           | 0.000         | 0.936 | 0.000 | 0.000 | 0.461 | 0.001            | 0.866 | 0.000 | 0.000 | 0.485 |
| AE visits 2 yrs prior                                 | 0.000         | 0.000 | 0.000 | 0.000 | 0.000 | 0.000            | 0.000 | 0.000 | 0.000 | 0.000 |
| AE unplanned follow-up visits 2 yrs prior             | 0.021         | 0.008 | 0.000 | 0.003 | 0.009 | 0.020            | 0.016 | 0.000 | 0.008 | 0.005 |
| AE X-ray 2yrs prior                                   | 0.183         | 0.555 | 0.019 | 0.022 | 0.005 | 0.210            | 0.320 | 0.048 | 0.161 | 0.006 |
| Outpatient specialty visits prior 0-90 days           | 0.000         | 0.000 | 0.000 | 0.000 | 0.000 | 0.000            | 0.000 | 0.000 | 0.000 | 0.000 |
| Outpatient specialty visits missed prior 0-90 days    | 0.000         | 0.000 | 0.000 |       | 0.002 | 0.000            | 0.000 | 0.000 |       | 0.008 |
| Outpatient specialty visits prior 91-180 days         | 0.196         | 0.043 | 0.003 | 0.002 | 0.016 | 0.516            | 0.630 | 0.648 | 0.054 | 0.184 |
| Outpatient specialty visits missed prior 91-180 days  | 0.027         | 0.000 | 0.000 |       | 0.000 | 0.039            | 0.000 | 0.002 |       | 0.000 |
| Outpatient specialty visits prior 181-365 days        | 0.763         | 0.009 | 0.400 | 0.094 | 0.000 | 0.595            | 0.844 | 0.000 | 0.491 | 0.002 |
| Outpatient specialty visits missed prior 181-365 days | 0.000         | 0.000 | 0.009 |       | 0.000 | 0.001            | 0.002 | 0.206 |       | 0.000 |
| Outpatient specialty visits 2 yrs prior               | 0.000         | 0.000 | 0.000 | 0.000 | 0.000 | 0.068            | 0.000 | 0.046 | 0.001 | 0.000 |
| Outpatient specialty visits missed 2 yrs prior        | 0.000         | 0.000 | 0.000 | 0.000 | 0.001 | 0.000            | 0.006 | 0.000 | 0.000 | 0.000 |
| GP DX COPD                                            |               |       |       |       |       | 0.002            | 0.000 | 0.001 | 0.000 | 0.003 |

|                                                         |       |       |       |       |       |
|---------------------------------------------------------|-------|-------|-------|-------|-------|
| GP - 1 long term condition                              | 0.000 | 0.229 | 0.310 | 0.000 | 0.000 |
| GP - 2 or more long term conditions                     | 0.001 | 0.000 | 0.100 | 0.098 | 0.000 |
| GP - Glomerular filtration rate group 3 last 0-365 days | 0.097 | 0.002 | 0.463 |       | 0.162 |
| GP - 10+ unique drugs prescribed                        | 0.000 | 0.000 | 0.000 | 0.000 | 0.000 |
| GP - 5-9 unique drugs prescribed                        | 0.000 | 0.000 | 0.000 | 0.000 | 0.000 |
| GP - 0-4 unique drugs prescribed                        | 0.000 | 0.000 | 0.000 | 0.000 | 0.000 |
| GP - Psychoactive substance misuse disorder             | 0.000 | 0.000 | 0.000 | 0.000 | 0.000 |
| GP - 7+ distinct disorders                              | 0.311 | 0.290 | 0.523 | 0.002 | 0.263 |
| GP visits prior 0-3 months                              | 0.873 | 0.002 | 0.000 | 0.000 | 0.000 |
| GP visits prior 4-6 months                              | 0.000 | 0.182 | 0.000 | 0.008 | 0.000 |
| GP visits prior 7-12 months                             | 0.075 | 0.136 | 0.000 | 0.987 | 0.006 |
| GP visits 2yrs prior                                    | 0.934 | 0.013 | 0.000 | 0.000 | 0.263 |
| GP - Increasing rate of GP visits during last 12 months | 0.000 | 0.001 | 0.000 | 0.000 | 0.010 |
| GP - Number of high risk BNFs                           | 0.009 | 0.691 | 0.004 | 0.216 | 0.002 |
| GP - Any high risk                                      | 0.000 | 0.000 | 0.000 | 0.000 | 0.000 |
| GP - Count of BNF chapters                              | 0.000 | 0.000 | 0.000 | 0.000 | 0.000 |
| GP - DX Dementia                                        | 0.000 | 0.000 | 0.000 | 0.000 | 0.000 |
| GP - Exception reported from quality indicators         | 0.020 | 0.003 | 0.001 | 0.020 | 0.062 |
| GP - Health visitor or district nurse visit             | 0.000 | 0.000 | 0.000 | 0.000 | 0.000 |
| GP - Record of IHD/angina                               | 0.355 | 0.361 | 0.006 | 0.202 | 0.288 |
| GP - Nebuliser used                                     | 0.359 | 0.000 | 0.001 | 0.019 | 0.001 |
| GP - Salbutamol prescribed                              | 0.550 | 0.523 | 0.001 | 0.989 | 0.795 |
| GP - Warfarin prescribed                                | 0.643 | 0.423 | 0.440 | 0.106 | 0.001 |
| GP - High blood pressure                                | 0.269 | 0.984 | 0.549 | 0.725 | 0.325 |
| GP - Smoker                                             | 0.000 | 0.000 | 0.000 | 0.000 | 0.000 |
| GP - BMI 30+                                            | 0.074 | 0.956 | 0.000 | 0.074 | 0.000 |
| GP - HbA1c > 10                                         | 0.000 | 0.000 | 0.000 | 0.000 | 0.000 |
| GD - QOF ARTF                                           | 0.130 | 0.240 | 0.024 | 0.586 | 0.136 |
| GP - QOF CKD                                            | 0.003 | 0.924 | 0.203 | 0.063 | 0.000 |
| GP - QOF Depression                                     | 0.240 | 0.000 | 0.000 | 0.024 | 0.016 |
| GP - Number of QOF DX categories 3+                     | 0.974 | 0.717 | 0.123 | 0.342 | 0.948 |
| GP - Number of phone contacts last 0-3 months           | 0.927 | 0.000 | 0.600 | 0.788 | 0.899 |
| Constant                                                | 0.000 | 0.000 | 0.000 | 0.000 | 0.000 |

---

## Appendix D Further information of model variables

| Variable                                         | Variable description                                                             | Time period/Date                   |
|--------------------------------------------------|----------------------------------------------------------------------------------|------------------------------------|
| <b>GP register variables</b>                     |                                                                                  |                                    |
| Age                                              | Age                                                                              | End calendar year (5 months after) |
| Age 65-74                                        | Age 65-74                                                                        | End calendar year (5 months after) |
| Age 75-84                                        | Age 75-84                                                                        | End calendar year (5 months after) |
| Age 85+                                          | Age 85+                                                                          | End calendar year (5 months after) |
| Female                                           | Sex = female                                                                     | N/A                                |
| Practice IMD                                     | Index of multiple deprivation - GP practice area                                 | N/A                                |
| Months registered 1 yr prior                     | Months registered with GP prior 1-12 months                                      | Prior 1 - 12 months (inclusive)    |
| Months registered 2 yrs prior                    | Months registered with GP prior 13-24 months                                     | Prior 13 - 24 months (inclusive)   |
| <b>SUS inpatient variables</b>                   |                                                                                  |                                    |
| EM Adms prior 0-90 days                          | Number of emergency admissions - prior 1-90 days                                 | Prior 1 to 90 days (inclusive)     |
| EL Adms prior 0-90 days                          | Number of elective admissions - prior 1-90 days                                  | Prior 1 to 90 days (inclusive)     |
| Any attender prior 0-90 days                     | Any regular attendance - prior 1-90 days                                         | Prior 1 to 90 days (inclusive)     |
| EM Adms prior 91-180 days                        | Number of emergency admissions - prior 91-180 days                               | Prior 91 to 180 days (inclusive)   |
| EL Adms prior 91-180 days                        | Number of emergency admissions - prior 181-365 days                              | Prior 181 to 365 days (inclusive)  |
| Any day case prior 0-90 days                     | Any day case prior 1-90 days                                                     | Prior 1 to 90 days (inclusive)     |
| Any day case prior 91-180 days                   | Any day case prior 91-180 days                                                   | Prior 91 to 180 days (inclusive)   |
| Any day case prior 181-365 days                  | Any day case prior 181-365 days                                                  | Prior 181 to 365 days (inclusive)  |
| Any day case 2 yrs prior                         | Any day case prior 366-730 days                                                  | Prior 366 to 730 days (inclusive)  |
| Em Adms 2 yrs prior                              | Number of emergency admissions - prior 366-730 days                              | Prior 366 to 730 days (inclusive)  |
| DX Diabetes                                      | Any prim or sec diagnosis - Diabetes, prior 2 years                              | Prior 1 to 730 days (inclusive)    |
| DX MI                                            | Any prim or sec diagnosis - Myocardial infarction, prior 2 years                 | Prior 1 to 730 days (inclusive)    |
| DX CHF                                           | Any prim or sec diagnosis - Congestive heart failure, prior 2 years              | Prior 1 to 730 days (inclusive)    |
| DX PVD                                           | Any prim or sec diagnosis - Peripheral vascular disease, prior 2 years           | Prior 1 to 730 days (inclusive)    |
| DX CVD                                           | Any prim or sec diagnosis - Cerebral vascular disease, prior 2 years             | Prior 1 to 730 days (inclusive)    |
| DX Dementia                                      | Any prim or sec diagnosis - Dementia, prior 2 years                              | Prior 1 to 730 days (inclusive)    |
| CD CTD                                           | Any prim or sec diagnosis - Connective tissue disease, prior 2 years             | Prior 1 to 730 days (inclusive)    |
| DX Cancer                                        | Any prim or sec diagnosis - Malignant cancer, prior 2 years                      | Prior 1 to 730 days (inclusive)    |
| DX Diabetes with complications                   | Any prim or sec diagnosis - Diabetes with complications, prior 2 years           | Prior 1 to 730 days (inclusive)    |
| DX Renal Disease                                 | Any prim or sec diagnosis - Renal disease, prior 2 years                         | Prior 1 to 730 days (inclusive)    |
| Charlson Index                                   | Charlson Comorbidity Index, prior 2 years                                        | Prior 1 to 730 days (inclusive)    |
| DX Alcohol                                       | Any prim or sec diagnosis - Alcohol abuse, prior 2 years                         | Prior 1 to 730 days (inclusive)    |
| DX COPD                                          | Any prim or sec diagnosis - Chronic obstructive pulmonary disease, prior 2 years | Prior 1 to 730 days (inclusive)    |
| DX Mental                                        | Any prim or sec diagnosis - Mental illness, prior 2 years                        | Prior 1 to 730 days (inclusive)    |
| DX Asthma                                        | Any prim or sec diagnosis - Asthma, prior 2 years                                | Prior 1 to 730 days (inclusive)    |
| DX Cognitive Impairment                          | Any prim or sec diagnosis - Miscellaneous cognitive dysfunctions, prior 2 years  | Prior 1 to 730 days (inclusive)    |
| DX ACS Condition                                 | Any prim or sec diagnosis - ACS: Any ambulatory care sensitive condition         | Prior 1 to 730 days (inclusive)    |
| <b>SUS AE variables</b>                          |                                                                                  |                                    |
| AE visits prior 0-90 days                        | Number of A&E visits (any) prior 1-90 days                                       | Prior 1 to 90 days (inclusive)     |
| AE unplanned follow-up visits prior 0-90 days    | Number of A&E visits - unplanned follow-up prior 1-90 days                       | Prior 1 to 90 days (inclusive)     |
| AE X-ray prior 0-90 days                         | Number of A&E visits with X-ray prior 1-90 days                                  | Prior 1 to 90 days (inclusive)     |
| AE visits prior 91-180 days                      | Number of A&E visits (any) prior 91-180 days                                     | Prior 91 to 180 days (inclusive)   |
| AE unplanned follow-up visits prior 91-180 days  | Number of A&E visits - unplanned follow-up prior 91-180 days                     | Prior 91 to 180 days (inclusive)   |
| AE X-ray prior 91-180 days                       | Number of A&E visits with X-ray prior 91-180 days                                | Prior 91 to 180 days (inclusive)   |
| AE visits prior 181-365 days                     | Number of A&E visits (any) prior 181-365 days                                    | Prior 91 to 180 days (inclusive)   |
| AE unplanned follow-up visits prior 181-365 days | Number of A&E visits - unplanned follow-up prior 181-365 days                    | Prior 181 to 365 days (inclusive)  |
| AE X-ray prior 181-365 days                      | Number of A&E visits with X-ray prior 181-365 days                               | Prior 181 to 365 days (inclusive)  |
| AE visits 2 yrs prior                            | Number of A&E visits (any) prior 366-730 days                                    | Prior 366 to 730 days (inclusive)  |
| AE unplanned follow-up visits 2 yrs prior        | Number of A&E visits - unplanned follow-up prior 366-730 days                    | Prior 366 to 730 days (inclusive)  |
| AE X-ray 2yrs prior                              | Number of A&E visits with X-ray prior 366-730 days                               | Prior 366 to 730 days (inclusive)  |

| <b>SUS outpatient variables</b>                         |                                                                         |                                   |
|---------------------------------------------------------|-------------------------------------------------------------------------|-----------------------------------|
| Outpatient specialty visits prior 0-90 days             | Number of outpatient visits (all) prior 1-90 days                       | Prior 1 to 90 days (inclusive)    |
| Outpatient specialty visits missed prior 0-90 days      | Number of outpatient visits missed prior 1-90 days                      | Prior 1 to 90 days (inclusive)    |
| Outpatient specialty visits prior 91-180 days           | Number of outpatient visits (all) prior 91-180 days                     | Prior 91 to 180 days (inclusive)  |
| Outpatient specialty visits missed prior 91-180 days    | Number of outpatient visits missed prior 91-180 days                    | Prior 91 to 180 days (inclusive)  |
| Outpatient specialty visits prior 181-365 days          | Number of outpatient visits (all) prior 181-365 days                    | Prior 181 to 365 days (inclusive) |
| Outpatient specialty visits missed prior 181-365 days   | Number of outpatient visits missed prior 181-365 days                   | Prior 181 to 365 days (inclusive) |
| Outpatient specialty visits 2 yrs prior                 | Number of outpatient visits (all) prior 365-730 days                    | Prior 366 to 730 days (inclusive) |
| Outpatient specialty visits missed 2 yrs prior          | Number of outpatient visits missed prior 365-730 days                   | Prior 366 to 730 days (inclusive) |
| <b>GP consultations data</b>                            |                                                                         |                                   |
| GP DX COPD                                              | Diagnosis of COPD, prior 2 years                                        | Prior 1 to 730 days (inclusive)   |
| GP - 1 long term condition                              | Chronic conditions - 1 in prior 2 years                                 | Prior 1 to 730 days (inclusive)   |
| GP - 2 or more long term conditions                     | Chronic conditions - 2 or more in prior 2 years                         | Prior 1 to 730 days (inclusive)   |
| GP - Glomerular filtration rate group 3 last 0-365 days | Glomerular Filtration Rate Group 3 in last year                         | Prior 1 to 365 days (inclusive)   |
| GP - 10+ unique drugs prescribed                        | 1-4 unique drugs - last 1 to 90 days                                    | Prior 1 to 90 days (inclusive)    |
| GP - 5-9 unique drugs prescribed                        | 5-9 unique drugs - last 1 to 90 days                                    | Prior 1 to 90 days (inclusive)    |
| GP - 0-4 unique drugs prescribed                        | 10+ unique drugs - last 1 to 90 days                                    | Prior 1 to 90 days (inclusive)    |
| GP - Psychoactive substance misuse disorder             | Psychoactive substance misuse disorder, prior 2 years                   | Prior 1 to 730 days (inclusive)   |
| GP - 7+ distinct disorders                              | 7+ distinct disease disorders recorded in prior 90 days                 | Prior 1 to 90 days (inclusive)    |
| GP - GP visits prior 0-3 months                         | Count of different BNF chapters of prescribed medicines, prior 2 years  | Prior 1 to 730 days (inclusive)   |
| GP - GP visits prior 4-6 months                         | Number of GP visits prior 1-3 months                                    | Prior 1 to 3 months (inclusive)   |
| GP - GP visits prior 7-12 months                        | Number of GP visits prior 13-24 months                                  | Prior 13 to 24 months (inclusive) |
| GP - GP visits 2yrs prior                               | Number of GP visits prior 4-6 months                                    | Prior 4 to 6 months (inclusive)   |
| GP - Increasing rate of GP visits during last 12 months | Number of GP visits prior 7-12 months                                   | Prior 7 to 12 months (inclusive)  |
| GP - Number of high risk BNFs                           | Substantial increase in GP visits last year                             |                                   |
| GP - Any high risk                                      | Number of BNF codes associated with emergency admissions, prior 2 years | Prior 1 to 730 days (inclusive)   |
| GP - Count of BNF chapters                              | Any BNF codes associated with emergency admissions, prior 2 years       | Prior 1 to 730 days (inclusive)   |
| GP - DX Dementia                                        | Diagnosis of Dementia, prior 2 years                                    | Prior 1 to 730 days (inclusive)   |
| GP - Exception reported from quality indicators         | QOF register exceptions, prior 2 years                                  | Prior 1 to 730 days (inclusive)   |
| GP - Health visitor or district nurse visit             | Any home/district visit, prior 2 years                                  | Prior 1 to 730 days (inclusive)   |
| GP - Record of IHD/angina                               | Diagnosis of IHD/angina, prior 2 years                                  | Prior 1 to 730 days (inclusive)   |
| GP - Nebuliser used                                     | Nebuliser prescribed, prior 2 years                                     | Prior 1 to 730 days (inclusive)   |
| GP - Salbutamol prescribed                              | Salbutamol prescribed, prior 2 years                                    | Prior 1 to 730 days (inclusive)   |
| GP - Warfarin prescribed                                | Warfarin prescribed, prior 2 years                                      | Prior 1 to 730 days (inclusive)   |
| GP - High blood pressure                                | High blood pressure Read code, prior 2 years                            | Prior 1 to 730 days (inclusive)   |
| GP - Smoker                                             | Smoking status, prior 2 years                                           | Prior 1 to 730 days (inclusive)   |
| GP - BMI 30+                                            | BMI greater than equal to 30, prior 2 years                             | Prior 1 to 730 days (inclusive)   |
| GP - HbA1c > 10                                         | HbA1c greater than 10, prior 2 years                                    | Prior 1 to 730 days (inclusive)   |
| GD - QOF ARTF                                           | QOF register: Atrial fibrillation                                       | Prior 1 to 730 days (inclusive)   |
| GP - QOF CKD                                            | QOF register: Stage 3 to 5 chronic kidney disease                       | Prior 1 to 730 days (inclusive)   |
| GP - QOF Depression                                     | QOF register: Depression                                                | Prior 1 to 730 days (inclusive)   |
| GP - Number of QOF DX categories 3+                     | QOF register: number of different registers, 3 or more                  | Prior 1 to 730 days (inclusive)   |
| GP - Number of phone contacts last 0-3 months           | Number of GP telephone consults prior 1-3 months                        | Prior 1 to 3 months (inclusive)   |
